# Supplementary material
Source: PubMed Central journal article supplement (PMC2000515)
Supplement: pnas_0703411104_5.pdf [file pnas_0703411104_5.pdf]

| TABLE 3. Modern and Museum specimens extracted at the ABC, Oxford                                                                                                                                                                                                                                                |                   |                      |        |             |            |              |                                                                          |              |          |                  |           |        |
|------------------------------------------------------------------------------------------------------------------------------------------------------------------------------------------------------------------------------------------------------------------------------------------------------------------|-------------------|----------------------|--------|-------------|------------|--------------|--------------------------------------------------------------------------|--------------|----------|------------------|-----------|--------|
| Extraction#                                                                                                                                                                                                                                                                                                      | complete sequence | external replication | Source | Source #    | Species    | Country      | Location                                                                 | element      | Status   | Breed            | Haplotype | Group  |
| GL374                                                                                                                                                                                                                                                                                                            |                   |                      | AD     |             | Sus scrofa | Romania      | Dubova, Iron Gates                                                       | tooth        | Wild     |                  |           | Red    |
| GL392                                                                                                                                                                                                                                                                                                            |                   |                      | NMNH   | AC631B      | Sus scrofa | Romania      |                                                                          | tooth        | Wild     |                  | C         | Red    |
| GL724                                                                                                                                                                                                                                                                                                            | I/C-80            |                      | GL     |             | Sus scrofa | Estonia      | Restaurant in Tallinn                                                    | hair         | Wild     |                  | ANC-Cside | Red    |
| GL748                                                                                                                                                                                                                                                                                                            | I/C               |                      | FMNH   | 44722       | Sus scrofa | Poland       | Amouk Plains                                                             | dried tissue | Wild     |                  |           | Yellow |
| GL749                                                                                                                                                                                                                                                                                                            |                   |                      | FMNH   | 46401       | Sus scrofa | Poland       | Bialystok Prov Bialowieza* National Park                                 | dried tissue | Wild     |                  | C         | Red    |
| GL750                                                                                                                                                                                                                                                                                                            | I/C               |                      | FMNH   | 47417       | Sus scrofa | Iraq         | Irbil, Baradost                                                          | dried tissue | Wild     |                  |           | Yellow |
| GL751                                                                                                                                                                                                                                                                                                            | I/C               |                      | FMNH   | 57294       | Sus scrofa | Iraq         | Baghdad, 3 mi S                                                          | dried tissue | Wild     |                  |           | Yellow |
| GL752                                                                                                                                                                                                                                                                                                            |                   |                      | FMNH   | 57946       | Sus scrofa | Iran         | Fars, Yasuj, 10.9 mi SW                                                  | dried tissue | Wild     |                  | EF        | Yellow |
| GL753                                                                                                                                                                                                                                                                                                            | I/C               |                      | FMNH   | 92910       | Sus scrofa | Iran         | Kermanshahan Kermanshah, E of                                            | dried tissue | Wild     |                  |           | Red    |
| GL754                                                                                                                                                                                                                                                                                                            |                   |                      | FMNH   | 98915       | Sus scrofa | Turkey       | Mersin (ifel) Tarsus Forest                                              | dried tissue | Wild     |                  | EF        | Yellow |
| GL766                                                                                                                                                                                                                                                                                                            | I/C-80            |                      | FMNH   | 42439       | Sus scrofa | Iraq         | Maysan, Amara, nr; Chahala                                               | dried tissue | Wild     |                  | ANC-Aside | Red    |
| GL767                                                                                                                                                                                                                                                                                                            | I/C-80            |                      | FMNH   | 43325       | Sus scrofa | Iraq         | Diyala, Khanaguin, 10 mi from; Rhamalla                                  | dried tissue | Wild     |                  | ANC-GL254 | Yellow |
| GL768                                                                                                                                                                                                                                                                                                            | I/C-80            |                      | FMNH   | 44723       | Sus scrofa | Syria        | Amouk Plains                                                             | dried tissue | Wild     |                  | ANC-Arm1T | Yellow |
| GL769                                                                                                                                                                                                                                                                                                            |                   |                      | FMNH   | 57940       | Sus scrofa | Iran         | Esfahan, Kuh Rang                                                        | dried tissue | Wild     |                  | EF        | Yellow |
| GL771                                                                                                                                                                                                                                                                                                            |                   |                      | FMNH   | 57947       | Sus scrofa | Iran         | Fars, Yasuj, 15 mi E                                                     | dried tissue | Wild     |                  | EP        | Yellow |
| GL779                                                                                                                                                                                                                                                                                                            | I/C               |                      | FMNH   | 84477       | Sus scrofa | Iraq         | As Sulaymaniyah, As Sulaymaniyah & Kirkuk, bet; Darband area, Zagros Mts | dried tissue | Wild     |                  | A         | Red    |
| GL781                                                                                                                                                                                                                                                                                                            |                   |                      | FMNH   | 92905       | Sus scrofa | Iran         | Kermanshahan, Kermanshah, Naft-i-Shah Oilfield & Pumping Station         | dried tissue | Wild     |                  | EP        | Yellow |
| GL782                                                                                                                                                                                                                                                                                                            | I/C-80            |                      | FMNH   | 92906       | Sus scrofa | Iran         | Khuzistan, Ahwaz, 30 km NW, bank of Karkeh R                             | dried tissue | Wild     |                  | ANC-GL254 | Yellow |
| GL783                                                                                                                                                                                                                                                                                                            |                   |                      | FMNH   | 92907       | Sus scrofa | Iran         | Khuzistan, Ahwaz-Andimeshk rd at Shahur R, E side of Karkeh R            | dried tissue | Wild     |                  | EO        | Yellow |
| GL784                                                                                                                                                                                                                                                                                                            | I/C-80            |                      | FMNH   | 92908       | Sus scrofa | Iran         | Khuzistan, Ahwaz-Andimeshk rd at Shahur R, E side of Karkeh R            | dried tissue | Wild     |                  | ANC-GL254 | Yellow |
| GL786                                                                                                                                                                                                                                                                                                            |                   |                      | FMNH   | 92909       | Sus scrofa | Iran         | Kermanshahan, Kermanshah, E of                                           | dried tissue | Wild     |                  | Q         | Red    |
| GL787                                                                                                                                                                                                                                                                                                            |                   |                      | FMNH   | 97881       | Sus scrofa | Iran         | Mazandaran, Sama, 5 km E                                                 | dried tissue | Wild     |                  |           | Grey   |
| GL788                                                                                                                                                                                                                                                                                                            | I/C-80            |                      | FMNH   | 97882       | Sus scrofa | Iran         | Maku, 3 mi NE                                                            | dried tissue | Wild     |                  | ANC-Arm2T | Yellow |
| GL789                                                                                                                                                                                                                                                                                                            |                   |                      | FMNH   | 97883       | Sus scrofa | Iran         | Mazandaran, Gorgan, 16 km ESE                                            | dried tissue | Wild     |                  | EK        | Grey   |
| GL790                                                                                                                                                                                                                                                                                                            |                   |                      | FMNH   | 97884       | Sus scrofa | Iran         | Mazandaran, Gorgan, 16 km ESE                                            | dried tissue | Wild     |                  |           | Yellow |
| GL791                                                                                                                                                                                                                                                                                                            | I/C-80            |                      | FMNH   | 97885       | Sus scrofa | Iran         | Mazandaran, Gorgan, 16 km ESE                                            | dried tissue | Wild     |                  | ANC-Easia | Grey   |
| GL792                                                                                                                                                                                                                                                                                                            |                   |                      | FMNH   | 97888       | Sus scrofa | Iran         | Sistan and Baluchistan, Zabol, 24 km SW                                  | dried tissue | Wild     |                  | EG        | Grey   |
| GL793                                                                                                                                                                                                                                                                                                            |                   |                      | FMNH   | 97889       | Sus scrofa | Iran         | Sistan and Baluchistan, Zabol, 32 km SW                                  | dried tissue | Wild     |                  | EG        | Grey   |
| GL794                                                                                                                                                                                                                                                                                                            |                   |                      | FMNH   | 97890       | Sus scrofa | Iran         | Sistan and Baluchistan, Zabol, 32 km SW                                  | dried tissue | Wild     |                  |           | Grey   |
| GL795                                                                                                                                                                                                                                                                                                            | I/C-80            |                      | FMNH   | 97891       | Sus scrofa | Iran         | Sistan and Baluchistan, Zabol, 24 km SW                                  | dried tissue | Wild     |                  | ANC-Easia | Grey   |
| GL799                                                                                                                                                                                                                                                                                                            |                   |                      | AD     |             | Sus scrofa | Romania      | Dubova, Iron Gates                                                       | tooth        | Wild     |                  | C         | Red    |
| GL912                                                                                                                                                                                                                                                                                                            | I/C               |                      | BMNH   | 20.2.25.7   | Sus scrofa | ?            | NW Persia                                                                | bone frag    | Wild     |                  | BQ        | Yellow |
| GL918                                                                                                                                                                                                                                                                                                            | I/C               |                      | BMNH   | 70.2134     | Sus scrofa | Russia       | Volga Delta                                                              | bone frag    | Wild     |                  |           | Red    |
| GL919                                                                                                                                                                                                                                                                                                            |                   |                      | BMNH   | 70.2138     | Sus scrofa | Russia       | Volga Delta                                                              | bone frag    | Wild     |                  | C         | Red    |
| GL935                                                                                                                                                                                                                                                                                                            | I/C               |                      | BMNH   | 87.12.22.2  | Sus scrofa | ?            | West Caucasus, north slope                                               | bone frag    | Wild     |                  |           | Red    |
| GL940                                                                                                                                                                                                                                                                                                            |                   |                      | BMNH   | 3.1.29.2    | Sus scrofa | Turkey       | Smyrna (Izmir)                                                           | bone frag    | Wild     |                  | EF        | Yellow |
| GL942                                                                                                                                                                                                                                                                                                            | I/C               |                      | BMNH   | 1958.4.10.2 | Sus scrofa | Sudan        | Nuba                                                                     | bone frag    | Domestic |                  | ER        | Yellow |
| GL943                                                                                                                                                                                                                                                                                                            | I/C               |                      | BMNH   | 1938.245    | Sus scrofa | Egypt        | Egyptian wild boar                                                       | bone frag    | Wild     |                  |           | Yellow |
| GL944                                                                                                                                                                                                                                                                                                            | I/C               |                      | BMNH   | 14.1.17.1   | Sus scrofa | Gorgia       | Kavkaz from tibilis (tibilisi)                                           | bone frag    | Wild     |                  | EJ        | Yellow |
| GL945                                                                                                                                                                                                                                                                                                            | I/C               |                      | BMNH   | 24.11.2.1   | Sus scrofa | Slovakia     |                                                                          | bone frag    | Wild     |                  | N         | Red    |
| GL946                                                                                                                                                                                                                                                                                                            | I/C               | X                    | BMNH   | 14.3.19.1   | Sus scrofa | Hungary      | Hungary                                                                  | bone frag    | Wild     |                  | C         | Red    |
| GL948                                                                                                                                                                                                                                                                                                            | I/C               |                      | BMNH   | N/A         | Sus scrofa | Greece       | Kos Island                                                               | bone frag    | Unknown  |                  | BK        | Red    |
| GL949                                                                                                                                                                                                                                                                                                            | I/C-80            |                      | BMNH   | N/A         | Sus scrofa | Greece       | Kos Island                                                               | bone frag    | Unknown  |                  | ANC-Aside | Red    |
| GL950                                                                                                                                                                                                                                                                                                            | I/C               |                      | BMNH   | 58.5.4.36   | Sus scrofa | ?            | African domestic                                                         | bone frag    | Domestic |                  |           | Red    |
| GL951                                                                                                                                                                                                                                                                                                            | I/C               | X                    | BMNH   | 1934.6.28.1 | Sus scrofa | Bulgaria     | Bulgaria                                                                 | bone frag    | Wild     |                  | ER        | Red    |
| GL952                                                                                                                                                                                                                                                                                                            | I/C               |                      | BMNH   | 1958.4.10.2 | Sus scrofa | Sudan        |                                                                          | bone frag    | Wild?    |                  |           | Yellow |
| GL959                                                                                                                                                                                                                                                                                                            |                   |                      | UA     |             | Sus scrofa | Italy        | Dorgali Area, Sardinia                                                   | hair         | Domestic | native Sardinian | EL        | Red    |
| GL960                                                                                                                                                                                                                                                                                                            |                   |                      | UA     |             | Sus scrofa | Italy        | Dorgali Area, Sardinia                                                   | hair         | Domestic | native Sardinian | EL        | Red    |
| GL961                                                                                                                                                                                                                                                                                                            |                   |                      | UA     |             | Sus scrofa | Italy        | Dorgali Area, Sardinia                                                   | hair         | Domestic | native Sardinian | EL        | Red    |
| GL1009                                                                                                                                                                                                                                                                                                           | I/C               |                      | KD     |             | Sus scrofa | Turkmenistan | nr Korakala cave I - Parkhai                                             | mandible     | Wild     |                  | EK        | Grey   |
| GL1040                                                                                                                                                                                                                                                                                                           |                   |                      | PC     |             | Sus scrofa | Cyprus       | Akamass region                                                           | hair         | Domestic | native Cypriot   | BK        | Red    |
| GL1041                                                                                                                                                                                                                                                                                                           |                   |                      | PC     |             | Sus scrofa | Cyprus       | Larnaca area                                                             | hair         | Domestic | native Cypriot   | A         | Red    |
| Extraction #: The code given to each individual.                                                                                                                                                                                                                                                                 |                   |                      |        |             |            |              |                                                                          |              |          |                  |           |        |
| Complete Sequence: A blank in this column indicates the complete sequence of 663bp of mitochondrial control region was obtained. An "I/C" indicates only a portion of the sequence was successfully obtained, but that that portion was long enough to be included in the phylogenetic analysis.                 |                   |                      |        |             |            |              |                                                                          |              |          |                  |           |        |
| An "I/C-80" indicates that for this sample, the only amplifiable fragment was derived using the short primer pair used for the ancient sequences. In this case, the haplotypes listed are those used on Table S8.                                                                                                |                   |                      |        |             |            |              |                                                                          |              |          |                  |           |        |
| External replication: An "X" in this column indicates that the sample was replicated externally in Adelaide, Australia, by Alan Cooper and Gaylor Dolman.                                                                                                                                                        |                   |                      |        |             |            |              |                                                                          |              |          |                  |           |        |
| Source: The codes for museums and individuals from which material and/or sequences were provided for work carried out in Oxford are as follows:                                                                                                                                                                  |                   |                      |        |             |            |              |                                                                          |              |          |                  |           |        |
| AD: Alexandru Dinu, UW Madison, Anthropology Department, 1180 Observatory Drive, 5240 Social Science Building, Madison, WI, 53706                                                                                                                                                                                |                   |                      |        |             |            |              |                                                                          |              |          |                  |           |        |
| BMNH: London National Museum of Natural History, Cromwell Road, London, SW7 5BD, UK (Richard Sabin)                                                                                                                                                                                                              |                   |                      |        |             |            |              |                                                                          |              |          |                  |           |        |
| FMNH: Field Museum of Natural History, Division of Mammals, 1400 S Lake Shore Drive, Chicago, Illinois 60605 (Bill Stanley)                                                                                                                                                                                      |                   |                      |        |             |            |              |                                                                          |              |          |                  |           |        |
| GL: Greger Larson, Dept. of Zoology, South Parks Road, Oxford OX1 3PS, UK                                                                                                                                                                                                                                        |                   |                      |        |             |            |              |                                                                          |              |          |                  |           |        |
| KD: Keith Dohney, Dept. of Archaeology, University of Durham, South Road, Durham DH1 3LE, UK                                                                                                                                                                                                                     |                   |                      |        |             |            |              |                                                                          |              |          |                  |           |        |
| NMNH: National Museum of Natural History of Romania, Sos. Kiseleff nr. 1, Bucuresti, Sector 1, Cod postal 011341                                                                                                                                                                                                 |                   |                      |        |             |            |              |                                                                          |              |          |                  |           |        |
| PC: Popi Chrysostomou, Dept. of Zoology, South Parks Road, Oxford OX1 3PS, UK                                                                                                                                                                                                                                    |                   |                      |        |             |            |              |                                                                          |              |          |                  |           |        |
| UA: Umberto Albarella, Department of Archaeology, University of Sheffield, Northgate House, West Street, Sheffield S1 4ET, UK                                                                                                                                                                                    |                   |                      |        |             |            |              |                                                                          |              |          |                  |           |        |
| Species: The genus and species names listed in this column were provided either by the person who provided the sample or were taken directly from the museum labels.                                                                                                                                             |                   |                      |        |             |            |              |                                                                          |              |          |                  |           |        |
| Status: The assigned status of "wild", "feral", or "domestic" was established either directly from the museum label and/or specimen catalogue, or provided by the individual who donated the sample. "Unknown" is used either when the term was used on the museum label or when no determination could be made. |                   |                      |        |             |            |              |                                                                          |              |          |                  |           |        |

| <b>TABLE 3. Modern and Museum specimens extracted at the ABC, Oxford</b>                                                                                                                                                                                                                                         |  |  |  |  |  |  |  |  |  |
|------------------------------------------------------------------------------------------------------------------------------------------------------------------------------------------------------------------------------------------------------------------------------------------------------------------|--|--|--|--|--|--|--|--|--|
|                                                                                                                                                                                                                                                                                                                  |  |  |  |  |  |  |  |  |  |
| Question marks following the terms indicate that the status could not be confirmed. The wild status of a handful of samples is called into question given their genetic sequences. Those specimens are discussed in greater detail below and the status label is listed in bold.                                 |  |  |  |  |  |  |  |  |  |
| <b>Haplotype:</b> This column indicates which named haplotype (derived from 663bp of sequence) the sample belongs to. Details regarding each specific haplotype can be found in Table S4. A blank in the haplotype column indicates that the sequence obtained from this sample was not shared by any other pig. |  |  |  |  |  |  |  |  |  |
| For those samples that only yielded 80bp of sequence, the haplotype follows the convention listed below in Table S8. Arm1T and Arm2T have been abbreviated A1 and A2 in Fig 1 of the main text.                                                                                                                  |  |  |  |  |  |  |  |  |  |
| <b>Group:</b> This column indicates in which general group (Red, Orange, Yellow, or Grey) on the trees depicted in Figs 1 and S1 the sample belongs.                                                                                                                                                             |  |  |  |  |  |  |  |  |  |
