# Supplementary material
Source: PubMed Central journal article supplement (PMC2000515)
Supplement: pnas_0703411104_6.pdf [file pnas_0703411104_6.pdf]

| Code                                                                    | # of pigs    | Accession # | Species        | Country            | Location                                        | Status          | Breed               | Haplotype | Group  |
|-------------------------------------------------------------------------|--------------|-------------|----------------|--------------------|-------------------------------------------------|-----------------|---------------------|-----------|--------|
| <b>Watanobe, et al. 1999, Watanobe et al. 2001, Okumura et al. 2001</b> |              |             |                |                    |                                                 |                 |                     |           |        |
| Wat99EuroAmerDom1D                                                      | 5            | D42170      | Sus scrofa     | ?                  |                                                 | Domestic        |                     | BK        | Red    |
| Wat99EuroAmerDom3D                                                      | 6            | D42185      | Sus scrofa     | Europe             |                                                 | Domestic        |                     | I         | Red    |
| Wat99EuroAmerDom2D                                                      | 2 - 1 EWB/1D | D42180      | Sus scrofa     | Germany            |                                                 | Domestic        |                     | S         | Red    |
| Wat99EuroUmItalWB1                                                      | 2            | AB015094    | Sus scrofa     | Italy              |                                                 | Wild            |                     | BH        | Orange |
| Wat99EuroUmItalWB3                                                      | 1            | AB015095    | Sus scrofa     | Italy              |                                                 | Wild            |                     | BG        | Orange |
| Wat01LargeWhite4D                                                       | 1            | AB041494    | Sus scrofa     | EuroAm             |                                                 | Domestic        | Large White         | A         | Red    |
| Wat01PietrainD                                                          | 1            | AB041489    | Sus scrofa     | EuroAm             |                                                 | Domestic        | Pietrain            | A         | Red    |
| Wat01HampshireD                                                         | 10           | AB041488    | Sus scrofa     | EuroAm             |                                                 | Domestic        | Hampshire           | A         | Red    |
| Wat01Okayama1D                                                          | 1            | AB041485    | Sus scrofa     | EuroAm             |                                                 | Domestic        | Berkshire           | A         | Red    |
| Wat01Okayama2D                                                          | 3            | AB041486    | Sus scrofa     | EuroAm             |                                                 | Domestic        |                     | BK        | Red    |
| Wat01KagoshBerkD                                                        | 3            | AB041484    | Sus scrofa     | EuroAm             |                                                 | Domestic        | Kagoshima Berkshire | E         | Red    |
| Wat01MeishanD                                                           | 7            | AB041474    | Sus scrofa     | East Asia / EuroAm |                                                 | Domestic        | Meishan             | GX        | Grey   |
| Wat01LargeWhite1D                                                       | 1            | AB041490    | Sus scrofa     | EuroAm             |                                                 | Domestic        | Large White         | GX        | Grey   |
| Wat01LargeWhite3D                                                       | 1            | AB041493    | Sus scrofa     | EuroAm             |                                                 | Domestic        | Large White         | M         | Red    |
| Wat01LargeWhite2D                                                       | 8            | AB041492    | Sus scrofa     | EuroAm             |                                                 | Domestic        | Large White         | U         | Red    |
| Wat01Kanagawa4D                                                         | 3            | AB041498    | Sus scrofa     | EuroAm             |                                                 | Domestic        | Landrace            | V         | Red    |
| Wat01Kanagawa3D                                                         | 1            | AB041497    | Sus scrofa     | EuroAm             |                                                 | Domestic        | Landrace            | W         | Red    |
| Wat01Jinhua1D                                                           | 3            | AB041475    | Sus scrofa     | East Asia          |                                                 | Domestic        | Jinhua              | Y         | Grey   |
| Wat01Jinhua3D                                                           | 1            | AB041477    | Sus scrofa     | East Asia          |                                                 | Domestic        | Jinhua              | Y         | Grey   |
| Wat01Okayama3D                                                          | 7            | AB041487    | Sus scrofa     | EuroAm             |                                                 | Domestic        | Duroc               | Z         | Grey   |
| Wat01Landrace2D                                                         | 2            | AB041499    | Sus scrofa     | EuroAm             |                                                 | Domestic        | Landrace            | AC        | Red    |
| Wat01LandraceD                                                          | 3            | AB041496    | Sus scrofa     | EuroAm             |                                                 | Domestic        | Landrace            |           | Red    |
| Wat01Kanagawa2D                                                         | 1            | AB041495    | Sus scrofa     | EuroAm             |                                                 | Domestic        | Landrace            |           | Red    |
| Wat01Kanagawa1D                                                         | 2            | AB041491    | Sus scrofa     | EuroAm             |                                                 | Domestic        |                     |           | Red    |
| OkuBerkD                                                                | 1            | AB059650    | Sus scrofa     | EuroAm             |                                                 | Domestic        | Berkshire           |           | Grey   |
| OkuEuroWB4                                                              | 1            | AB059651    | Sus scrofa     | Italy              |                                                 | <b>Wild</b>     |                     |           | Grey   |
| Oku00Paethiopicus                                                       | 1            | AB046876    | P. aethiopicus |                    |                                                 | Wild - outgroup |                     |           |        |
| MacDom                                                                  | 25           | D16483      | Sus scrofa     | EuroAm             |                                                 | Domestic        |                     | A         | Red    |
| <b>Larson et al 2005</b>                                                |              |             |                |                    |                                                 |                 |                     |           |        |
| GL46                                                                    | 1            | AY884612    | Sus scrofa     | India              | Kashmir, Valley of Kashmir                      | Wild            |                     | BW        | nd     |
| GL52                                                                    | 1            | AY884616    | Sus scrofa     | Spain              | Burgos, Palacios De La Sierra                   | Wild            |                     |           | Red    |
| GL54                                                                    | 1            | AY884618    | Sus scrofa     | Pakistan           | Lahore, Saikot                                  | Wild            |                     |           | nd     |
| GL55                                                                    | 1            | AY884619    | Sus scrofa     | Turkey             | Izmir, North of Yeni Foca                       | Wild            |                     |           | Yellow |
| GL56                                                                    | 1            | AY884620    | Sus scrofa     | Nepal              | Dharan Bazar                                    | Wild            |                     |           | nd     |
| GL59                                                                    | 1            | AY884622    | Sus scrofa     | Iran               | Hamadan                                         | Wild            |                     | BQ        | Yellow |
| GL63                                                                    | 1            | AY884626    | Sus scrofa     | Germany            | Hartz Mts                                       | Wild            |                     | A         | Red    |
| GL65                                                                    | 1            | AY884628    | Sus scrofa     | Italy              | Sinnai, Cagliari, Sardinia                      | Feral           |                     |           | Orange |
| GL71                                                                    | 1            | AY884633    | Sus scrofa     | France             | Cote D'Or, Is-sur-Tille                         | Wild            |                     | AJ        | Red    |
| GL73                                                                    | 1            | AY884635    | Sus scrofa     | Morocco            | Oudqa, Taforal                                  | Wild            |                     | C         | Red    |
| GL77                                                                    | 1            | AY884638    | Sus scrofa     | Iran               | Mazanderon, 25km East of Gorgon                 | Wild            |                     |           | Grey   |
| GL83                                                                    | 1            | AY884643    | Sus scrofa     | India              | Assam, 3rd Tank area                            | Feral           |                     | AA        | nd     |
| GL89                                                                    | 1            | AY884649    | Sus scrofa     | Nepal              | Royal Chitawan National Park, Charara Grassland | Wild            |                     |           | nd     |
| GL107                                                                   | 1            | AY884664    | Sus scrofa     | Germany            | Czech / German border                           | Wild            |                     |           | Red    |
| GL108                                                                   | 1            | AY884665    | Sus scrofa     | Germany            | WFG Wriesen                                     | Wild            |                     | A         | Red    |
| GL109                                                                   | 1            | AY884666    | Sus scrofa     | Germany            | Rathsdorf                                       | Wild            |                     | C         | Red    |
| GL110                                                                   | 1            | AY884667    | Sus scrofa     | France             | Corsica                                         | Feral           |                     | A         | Red    |
| GL111                                                                   | 1            | AY884668    | Sus scrofa     | Italy              | Sardinia                                        | Feral           |                     | A         | Red    |
| GL112                                                                   | 1            | AY884669    | Sus scrofa     | Holland            | Het Loo                                         | Wild            |                     | A         | Red    |
| GL113                                                                   | 1            | AY884670    | Sus scrofa     | Macedonia          |                                                 | Wild            |                     |           | Red    |
| GL132                                                                   | 1            | AY884671    | Sus scrofa     | India              |                                                 | Wild            |                     |           | nd     |
| GL133                                                                   | 1            | AY884672    | Sus scrofa     | Norway             | Stene I Bo, Iofoten Islands                     | Feral           |                     | E         | Red    |
| GL141                                                                   | 1            | AY884679    | Sus scrofa     | Armenia            |                                                 | <b>Wild</b>     |                     | A         | Red    |
| GL142                                                                   | 1            | AY884680    | Sus scrofa     | Armenia            | Vaik region                                     | Wild            |                     | BQ        | Yellow |
| GL143                                                                   | 1            | AY884681    | Sus scrofa     | France             | Near Levie, Corsica                             | Feral           |                     |           | Red    |
| GL144                                                                   | 1            | AY884682    | Sus scrofa     | Italy              | Near Tempio, Gallura, Sardinia                  | Wild            |                     | AJ        | Red    |
| GL162                                                                   | 1            | AY884689    | Sus scrofa     | India              | Kashmir, Woolar Lake                            | Wild            |                     | BW        | nd     |
| GL190                                                                   | 1            | AY884690    | Sus scrofa     | Italy              | Sardinia                                        | Feral           |                     |           | Orange |

| Code                   | # of pigs | Accession # | Species    | Country  | Location                     | Status   | Breed             | Haplotype | Group  |
|------------------------|-----------|-------------|------------|----------|------------------------------|----------|-------------------|-----------|--------|
| GL193                  | 1         | AY884693    | Sus scrofa | Armenia  |                              | Wild     |                   |           | Yellow |
| GL194                  | 1         | AY884694    | Sus scrofa | Armenia  |                              | Wild     |                   |           | Yellow |
| GL220                  | 1         | AY884696    | Sus scrofa | France   | Alta Roca, Corsica           | Feral    |                   |           | Yellow |
| GL221                  | 1         | AY884697    | Sus scrofa | Spain    | Asturias                     | Wild     |                   |           | Red    |
| GL222                  | 1         | AY884698    | Sus scrofa | Portugal | Estremadra                   | Wild     |                   |           | Red    |
| GL226                  | 1         | AY884701    | Sus scrofa | India    | Sus cristatus                | Wild     |                   |           | nd     |
| GL235                  | 1         | AY884709    | Sus scrofa | India    | Surguja, Ambikapur           | Wild     |                   |           | nd     |
| GL236                  | 1         | AY884710    | Sus scrofa | Armenia  |                              | Wild     |                   | BQ        | Yellow |
| GL241                  | 1         | AY884713    | Sus scrofa | India    |                              | Wild     |                   |           | nd     |
| GL242                  | 1         | AY884714    | Sus scrofa | Spain    | Aragon                       | Wild     |                   |           | Red    |
| GL244                  | 1         | AY884716    | Sus scrofa | Italy    | Maremma Region               | Wild     |                   |           | Orange |
| GL245                  | 1         | AY884717    | Sus scrofa | Italy    | Maremma Region               | Wild     |                   | BH        | Orange |
| GL246                  | 1         | AY884718    | Sus scrofa | Italy    | Maremma Region               | Wild     |                   | BH        | Orange |
| GL247                  | 1         | AY884719    | Sus scrofa | Italy    | Maremma Region               | Wild     |                   | BG        | Orange |
| GL248                  | 1         | AY884720    | Sus scrofa | Italy    | Maremma Region               | Wild     |                   | BG        | Orange |
| GL249                  | 1         | AY884721    | Sus scrofa | Italy    | Maremma Region               | Wild     |                   |           | Orange |
| GL250                  | 1         | AY884722    | Sus scrofa | Italy    | Maremma Region               | Wild     |                   | BH        | Orange |
| GL251                  | 1         | AY884723    | Sus scrofa | Italy    | Maremma Region               | Wild     |                   | BH        | Orange |
| GL252                  | 1         | AY884724    | Sus scrofa | Italy    | near Florence                | Wild     |                   | A         | Red    |
| GL254                  | 1         | AY884725    | Sus scrofa | Iran     |                              | Wild     |                   | EO        | Yellow |
| GL270                  | 1         | AY884726    | Sus scrofa | Armenia  |                              | Wild     |                   | EJ        | Yellow |
| GL271                  | 1         | AY884727    | Sus scrofa | Armenia  |                              | Wild     |                   | BQ        | Yellow |
| GL284                  | 1         | AY884728    | Sus scrofa | France   | Alta Roca, Corsica           | Feral    |                   | A         | Red    |
| GL285                  | 1         | AY884729    | Sus scrofa | France   | Alta Roca, Corsica           | Feral    |                   | A         | Red    |
| GL286                  | 1         | AY884730    | Sus scrofa | France   | Ota, Corsica                 | Feral    |                   |           | Red    |
| GL287                  | 1         | AY884731    | Sus scrofa | France   | Near Levie, Corsica          | Feral    |                   | BK        | Red    |
| GL288                  | 1         | AY884732    | Sus scrofa | Italy    | Sardinia                     | Feral    |                   | A         | Red    |
| GL289                  | 1         | AY884733    | Sus scrofa | Italy    | Urzulei, Ogliastra, Sardinia | Feral    |                   | BK        | Red    |
| LDomDuroc02            | 1         | AY884746    | Sus scrofa | UK       |                              | Domestic | Duroc             | A         | Red    |
| LDomGermBunte01        | 1         | AY884754    | Sus scrofa | Germany  |                              | Domestic | German Bunte      | A         | Red    |
| LDomPortBisaro01       | 1         | AY884755    | Sus scrofa | Portugal |                              | Domestic | Portugese Bisaro  | A         | Red    |
| LDomHampshire02        | 1         | AY884758    | Sus scrofa | Germany  |                              | Domestic | Hampshire         | A         | Red    |
| LDomGermanAngler       | 1         | AY884781    | Sus scrofa | Germany  |                              | Domestic | German Angler     | A         | Red    |
| LDomLargeWhite05       | 1         | AY884761    | Sus scrofa | UK       |                              | Domestic | Large White       | A         | Red    |
| LDomLandrace14         | 1         | AY884787    | Sus scrofa | Germany  |                              | Domestic | Landrace          | A         | Red    |
| BK01 - berkshire       | 1         | AY884783    | Sus scrofa | UK       |                              | Domestic | Berkshire         | A         | Red    |
| LDomHampshire01        | 1         | AY884777    | Sus scrofa | UK       |                              | Domestic | Hampshire         | A         | Red    |
| LDomPietrain05         | 1         | AY884766    | Sus scrofa | France   |                              | Domestic | Pietrain          | A         | Red    |
| LDomLeicoma01          | 1         | AY884759    | Sus scrofa | UK       |                              | Domestic | Leicoma           | A         | Red    |
| LDomLandrace04         | 1         | AY884747    | Sus scrofa | Denmark  |                              | Domestic | Landrace          | BK        | Red    |
| LDomHungaryMangalica01 | 1         | AY884764    | Sus scrofa | Hungary  |                              | Domestic | Hng. Mangalica    | BK        | Red    |
| LDomLandrace12         | 1         | AY884773    | Sus scrofa | UK       |                              | Domestic | Landrace          | BK        | Red    |
| LDomLandrace10         | 1         | AY884774    | Sus scrofa | UK       |                              | Domestic | Landrace          | BK        | Red    |
| LDomLandrace05         | 1         | AY884776    | Sus scrofa | Denmark  |                              | Domestic | Landrace          | BK        | Red    |
| LCorsica82             | 1         | AY884796    | Sus scrofa | France   | Corsica                      | Feral    |                   | BK        | Red    |
| LNSardinia88           | 1         | AY884795    | Sus scrofa | Italy    | Sardinia                     | Feral    |                   | BK        | Red    |
| LDomBritishLop01       | 1         | AY884756    | Sus scrofa | UK       |                              | Domestic | British lop eared | C         | Red    |
| LDomIberiaBlack01      | 1         | AY884765    | Sus scrofa | Spain    |                              | Domestic | Iberian black     | C         | Red    |
| LDomMidWhite01         | 1         | AY884770    | Sus scrofa | UK       |                              | Domestic | Middle white      | C         | Red    |
| LDomLandrace13         | 1         | AY884760    | Sus scrofa | France   |                              | Domestic | Landrace          | D         | Red    |
| LDomUKTamworth01       | 1         | AY884767    | Sus scrofa | UK       |                              | Domestic | Tamworth          | D         | Red    |
| LDomFranceCreole01     | 1         | AY884779    | Sus scrofa | France   |                              | Domestic | Creole France     | D         | Red    |
| MJ01 - manchado jabugo | 1         | AY884782    | Sus scrofa | Spain    |                              | Domestic | Manchado Jabugo   | D         | Red    |
| LDomLarWhite07         | 1         | AY884785    | Sus scrofa | UK       |                              | Domestic | Large White       | D         | Red    |
| LDomLandrace09         | 1         | AY884749    | Sus scrofa | Iceland  |                              | Domestic | Landrace          | E         | Red    |
| LDomDuroc03            | 1         | AY884778    | Sus scrofa | Germany  |                              | Domestic | Duroc             | E         | Red    |
| LDomBritishOldSpot01   | 1         | AY884757    | Sus scrofa | UK       |                              | Domestic | British old spot  | FH        | Red    |
| LDomLarWhite02         | 1         | AY884786    | Sus scrofa | Germany  |                              | Domestic | Large White       | FH        | Red    |
| LDomLargeWhite06       | 1         | AY884762    | Sus scrofa | UK       |                              | Domestic | LargeWhite        | FH        | Red    |
| LDomLarWhite10         | 1         | AY884772    | Sus scrofa | Germany  |                              | Domestic | Large White       | GX        | Grey   |
| LB01 - large black     | 1         | AY884784    | Sus scrofa | UK       |                              | Domestic | Large Black       | GX        | Grey   |
| LDomLandrace11         | 1         | AY884750    | Sus scrofa | UK       |                              | Domestic | Landrace          | L         | Grey   |

| Code                      | # of pigs | Accession # | Species    | Country   | Location        | Status   | Breed                 | Haplotype | Group |
|---------------------------|-----------|-------------|------------|-----------|-----------------|----------|-----------------------|-----------|-------|
| LDomLargeWhite08          | 1         | AY884763    | Sus scrofa | France    |                 | Domestic | Large White           | M         | Red   |
| LDomLandrace06            | 1         | AY884775    | Sus scrofa | Finland   |                 | Domestic | Landrace              | N         | Red   |
| LDomPietrain03            | 1         | AY884769    | Sus scrofa | Germany   |                 | Domestic | Pietrain              | R         | Red   |
| LDomLandrace08            | 1         | AY884748    | Sus scrofa | Norway    |                 | Domestic | Landrace              |           | Red   |
| LDomNegroCanaria01        | 1         | AY884752    | Sus scrofa | Spain     |                 | Domestic | Negro Canaria         |           | Red   |
| LDomNegroCanaria12        | 1         | AY884753    | Sus scrofa | Spain     | Canary Island   | Domestic | Negro Canaria         |           | Red   |
| LDomPietrain04            | 1         | AY884768    | Sus scrofa | UK        | Canary Island   | Domestic | Pietrain              |           | Red   |
| LDomBritSaddle01          | 1         | AY884780    | Sus scrofa | UK        |                 | Domestic | British Saddleback    |           | Red   |
| French Wild Boar          | 1         | AY884815    | Sus scrofa | France    |                 | Wild     |                       |           | Red   |
| LDomSwedLinderod01        | 1         | AY884751    | Sus scrofa | Sweden    |                 | Domestic | Swedish Linderod      | AF        | Red   |
| LDomMeishan02             | 1         | AY884771    | Sus scrofa | UK(China) |                 | Domestic | Chinese Meishan       |           | Grey  |
| <b>Gongora et al 2004</b> |           |             |            |           |                 |          |                       |           |       |
| AY463063                  | 1         | AY463063    | Sus scrofa | Germany   |                 | Domestic | Angeln Saddleback     |           | Red   |
| AY463064                  | 1         | AY463064    | Sus scrofa | Germany   |                 | Domestic | Angeln Saddleback     | A         | Red   |
| AY463065                  | 1         | AY463065    | Sus scrofa | Germany   |                 | Domestic | Bentheim Black Pied 1 |           | Red   |
| AY463066                  | 1         | AY463066    | Sus scrofa | Germany   |                 | Domestic | Bentheim Black Pied 2 | A         | Red   |
| AY463067                  | 1         | AY463067    | Sus scrofa | Germany   |                 | Domestic | Gottingen minipig 1   | AE        | Grey  |
| AY463068                  | 1         | AY463068    | Sus scrofa | Germany   |                 | Domestic | Gottingen minipig 2   | D         | Grey  |
| AY463069                  | 1         | AY463069    | Sus scrofa | Germany   |                 | Domestic | Landrace              |           | Red   |
| AY463070                  | 1         | AY463070    | Sus scrofa | Germany   |                 | Domestic | Large White           |           | Red   |
| AY463071                  | 1         | AY463071    | Sus scrofa | Germany   |                 | Domestic | Red Angel Saddleback  |           | Red   |
| AY463072                  | 1         | AY463072    | Sus scrofa | Hungary   |                 | Domestic | Mangalitzta           |           | Red   |
| <b>Alves et al.2003</b>   |           |             |            |           |                 |          |                       |           |       |
| IB15                      | 1         | AY232856    | Sus scrofa | Iberia    |                 | Domestic | Iberian Red           | A         | Red   |
| IB26                      | 1         | AY232867    | Sus scrofa | Iberia    |                 | Domestic | Iberian Blond         | A         | Red   |
| D3                        | 1         | AY232877    | Sus scrofa | ?         |                 | Domestic | Duroc                 | A         | Red   |
| B                         | 1         | AY232891    | Sus scrofa | Iberia    |                 | Domestic | Basque                | A         | Red   |
| LR1                       | 1         | AY232884    | Sus scrofa | ?         |                 | Domestic | Landrace              | A         | Red   |
| P1                        | 1         | AY232886    | Sus scrofa | ?         |                 | Domestic | Pietrain              | A         | Red   |
| MG                        | 1         | AY232892    | Sus scrofa | Hungary   |                 | Domestic | Hungary Mangalitzta   | A         | Red   |
| IB17                      | 1         | AY232858    | Sus scrofa | Iberia    |                 | Domestic | Iberian Red           | BK        | Red   |
| D4                        | 1         | AY232878    | Sus scrofa | ?         |                 | Domestic | Duroc                 | BK        | Red   |
| IB3                       | 1         | AY232844    | Sus scrofa | Spain     | Guadiana Valley | Domestic | Black Hairless        | C         | Red   |
| IB12                      | 1         | AY232853    | Sus scrofa | Iberia    |                 | Domestic | Black Hairless        | C         | Red   |
| IB4                       | 1         | AY232845    | Sus scrofa | Portugal  |                 | Domestic | Portugese Red         | C         | Red   |
| IB5                       | 1         | AY232846    | Sus scrofa | Spain     | La Serena       | Domestic | Black Hairless        | C         | Red   |
| IB6                       | 1         | AY232847    | Sus scrofa | Spain     | La Serena       | Domestic | Black Hairless        | C         | Red   |
| IB7                       | 1         | AY232877    | Sus scrofa | Spain     | La Serena       | Domestic | Black Hairless        | C         | Red   |
| IB10                      | 1         | AY232851    | Sus scrofa | Iberia    |                 | Domestic | Black Hairless        | C         | Red   |
| IB13                      | 1         | AY232854    | Sus scrofa | Iberia    |                 | Domestic | Black Hairless        | C         | Red   |
| IB19                      | 1         | AY232860    | Sus scrofa | Iberia    |                 | Domestic | Iberian Red           | C         | Red   |
| IB9                       | 1         | AY232850    | Sus scrofa | Spain     | La Serena       | Domestic | Black Hairless        | C         | Red   |
| IB14                      | 1         | AY232855    | Sus scrofa | Iberia    |                 | Domestic | Black Hairless        | C         | Red   |
| IB16                      | 1         | AY232857    | Sus scrofa | Iberia    |                 | Domestic | Iberian Red           | C         | Red   |
| IB18                      | 1         | AY232859    | Sus scrofa | Iberia    |                 | Domestic | Iberian Red           | C         | Red   |
| IB25                      | 1         | AY232866    | Sus scrofa | Iberia    |                 | Domestic | Black Hairy           | C         | Red   |
| SJ                        | 1         | AY232890    | Sus scrofa | Spain     |                 | Domestic | Spotted Black Jabugo  | D         | Grey  |
| LW1                       | 1         | AY232882    | Sus scrofa | ?         |                 | Domestic | Large White           | D         | Grey  |
| IB23                      | 1         | AY232864    | Sus scrofa | Iberia    |                 | Domestic | Black Hairy           | E         | Red   |
| D1                        | 1         | AY232875    | Sus scrofa | ?         |                 | Domestic | Duroc                 | M         | Red   |
| D2                        | 1         | AY232876    | Sus scrofa | ?         |                 | Domestic | Duroc                 | M         | Red   |
| D7                        | 1         | AY232881    | Sus scrofa | ?         |                 | Domestic | Duroc                 | N         | Red   |
| IB11                      | 1         | AY232852    | Sus scrofa | Iberia    |                 | Domestic | Black Hairless        | O         | Red   |
| IB21                      | 1         | AY232862    | Sus scrofa | Iberia    |                 | Domestic | Black Hairy           | O         | Red   |
| MS1                       | 1         | AY232888    | Sus scrofa | ?         |                 | Domestic | Meishan               | P         | Grey  |
| MS2                       | 1         | AY232889    | Sus scrofa | ?         |                 | Domestic | Meishan               | P         | Grey  |
| LR2                       | 1         | AY232885    | Sus scrofa | ?         |                 | Domestic | Landrace              | Q         | Red   |

| Table 4. A list of pig sequences from previous studies(1-11) and additional sequences deposited on GenBank from four unpublished studies.                                                                                                                                                     |           |             |            |         |           |             |                       |           |        |
|-----------------------------------------------------------------------------------------------------------------------------------------------------------------------------------------------------------------------------------------------------------------------------------------------|-----------|-------------|------------|---------|-----------|-------------|-----------------------|-----------|--------|
| Code                                                                                                                                                                                                                                                                                          | # of pigs | Accession # | Species    | Country | Location  | Status      | Breed                 | Haplotype | Group  |
| LW2                                                                                                                                                                                                                                                                                           | 1         | AY232883    | Sus scrofa | ?       |           | Domestic    | Large White           | S         | Grey   |
| D6                                                                                                                                                                                                                                                                                            | 1         | AY232880    | Sus scrofa | ?       |           | Domestic    | Duroc                 | V         | Red    |
| IB8                                                                                                                                                                                                                                                                                           | 1         | AY232849    | Sus scrofa | Spain   | La Serena | Domestic    | Black Hairless        | W         | Red    |
| IB1                                                                                                                                                                                                                                                                                           | 1         | AY232842    | Sus scrofa | Spain   |           | Domestic    | Blond Alentejano      | BZ        | Red    |
| IB2                                                                                                                                                                                                                                                                                           | 1         | AY232843    | Sus scrofa | Spain   |           | Domestic    | Blond Alentejano      | BZ        | Red    |
| IB20                                                                                                                                                                                                                                                                                          | 1         | AY232861    | Sus scrofa | Iberia  |           | Domestic    | Iberian Red           | BZ        | Red    |
| IB22                                                                                                                                                                                                                                                                                          | 1         | AY232863    | Sus scrofa | Iberia  |           | Domestic    | Black Hairly          |           | Red    |
| IB24                                                                                                                                                                                                                                                                                          | 1         | AY232865    | Sus scrofa | Iberia  |           | Domestic    | Black Hairly          |           | Red    |
| SWB1                                                                                                                                                                                                                                                                                          | 1         | AY232868    | Sus scrofa | Spain   |           | Wild        |                       | BY        | Red    |
| SWB2                                                                                                                                                                                                                                                                                          | 1         | AY232869    | Sus scrofa | Spain   |           | Wild        |                       | BY        | Red    |
| SWB3                                                                                                                                                                                                                                                                                          | 1         | AY232870    | Sus scrofa | Spain   |           | Wild        |                       | BY        | Red    |
| SWB6                                                                                                                                                                                                                                                                                          | 1         | AY232871    | Sus scrofa | Spain   |           | Wild        |                       |           | Red    |
| SWB4                                                                                                                                                                                                                                                                                          | 1         | AY232872    | Sus scrofa | Spain   |           | Wild        |                       | CA        | Red    |
| SWB5                                                                                                                                                                                                                                                                                          | 1         | AY232873    | Sus scrofa | Spain   |           | Wild        |                       | CA        | Red    |
| SWB7                                                                                                                                                                                                                                                                                          | 1         | AY232874    | Sus scrofa | Spain   |           | Wild        |                       |           | Red    |
| P2                                                                                                                                                                                                                                                                                            | 1         | AY232887    | Sus scrofa | ?       |           | Domestic    | Pietrain              |           | Grey   |
| D5                                                                                                                                                                                                                                                                                            | 1         | AY232879    | Sus scrofa | ?       |           | Domestic    | Duroc                 |           | Grey   |
| <b>Giuffra, et al. 2000</b>                                                                                                                                                                                                                                                                   |           |             |            |         |           |             |                       |           |        |
| GiuMangalicaD                                                                                                                                                                                                                                                                                 | 1         | AF136557    | Sus scrofa | ?       |           | Domestic    | Mangalica             | BK        | Red    |
| GiuHampshire2D                                                                                                                                                                                                                                                                                | 1         | AF136559    | Sus scrofa | Sweden  |           | Domestic    | Hampshire             | Q         | Red    |
| GiuUKHampshire1D                                                                                                                                                                                                                                                                              | 1         | AF136558    | Sus scrofa | Sweden  |           | Domestic    | Hampshire             | R         | Red    |
| GiuUKLandrace1D                                                                                                                                                                                                                                                                               | 1         | AF136560    | Sus scrofa | Sweden  |           | Domestic    | Landrace              | N         | Red    |
| GiuUKDurocD                                                                                                                                                                                                                                                                                   | 1         | AF136568    | Sus scrofa | Sweden  |           | Domestic    | Duroc                 | Z         | Red    |
| GiuUKLandrace2D                                                                                                                                                                                                                                                                               | 1         | AF136561    | Sus scrofa | Sweden  |           | Domestic    | Landrace              | AC        | Red    |
| GiuUKLargWht2D                                                                                                                                                                                                                                                                                | 1         | AF136562    | Sus scrofa | Sweden  |           | Domestic    | Large White           |           | Red    |
| GiuUKLargWht1D                                                                                                                                                                                                                                                                                | 1         | AF136566    | Sus scrofa | Sweden  |           | Domestic    | Large White           | T         | Red    |
| GiuPolEWB1                                                                                                                                                                                                                                                                                    | 1         | AF136555    | Sus scrofa | Poland  |           | Wild        |                       | BA        | Red    |
| GiuPolEWB2                                                                                                                                                                                                                                                                                    | 1         | AF136556    | Sus scrofa | Poland  |           | Wild        |                       | C         | Red    |
| GiuItalEWB3                                                                                                                                                                                                                                                                                   | 1         | AF136563    | Sus scrofa | Italy   |           | Wild        |                       |           | Orange |
| GiuIsrealiWB                                                                                                                                                                                                                                                                                  | 3         | AF136558    | Sus scrofa | Israel  |           | <b>Wild</b> |                       | R         | Red    |
| <b>Ursing &amp; Arnasson 1998</b>                                                                                                                                                                                                                                                             |           |             |            |         |           |             |                       |           |        |
| UrsSwedeSlaughter                                                                                                                                                                                                                                                                             | 1         | AJ002189    | Sus scrofa | Sweden  |           | Domestic    |                       | N         | Red    |
| <b>Kijas &amp; Andersson 2001</b>                                                                                                                                                                                                                                                             |           |             |            |         |           |             |                       |           |        |
| Kijas01SwedishWB                                                                                                                                                                                                                                                                              | 1         | AF304203    | Sus scrofa | Sweden  |           | Wild        |                       |           | Red    |
| <b>Gongora et al. 2003</b>                                                                                                                                                                                                                                                                    |           |             |            |         |           |             |                       |           |        |
| GongFinnish1                                                                                                                                                                                                                                                                                  | 1         | AF535161    | Sus scrofa | Finland |           | Domestic    |                       | AF        | Red    |
| GongFinnish3                                                                                                                                                                                                                                                                                  | 1         | AF535162    | Sus scrofa | Finland |           | Domestic    |                       | A         | Red    |
| GongFinnish36                                                                                                                                                                                                                                                                                 | 1         | AF535163    | Sus scrofa | Finland |           | Wild        |                       | BA        | Red    |
| GongFinnish41                                                                                                                                                                                                                                                                                 | 1         | AF535164    | Sus scrofa | Finland |           | Wild        |                       |           | Red    |
| <b>Randi et al. 2002</b>                                                                                                                                                                                                                                                                      |           |             |            |         |           |             |                       |           |        |
| RandiSus1                                                                                                                                                                                                                                                                                     | 1         | AJ314542    | Sus scrofa | ?       |           | Wild        |                       | C         | Red    |
| RandiSus3                                                                                                                                                                                                                                                                                     | 1         | AJ314544    | Sus scrofa | Italy   | Sardinia  | Feral       |                       | A         | Red    |
| <b>Yue unpublshed paper</b>                                                                                                                                                                                                                                                                   |           |             |            |         |           |             |                       |           |        |
| YueSchHall                                                                                                                                                                                                                                                                                    | 1         | AY230819    | Sus scrofa |         |           | Domestic    | Schwabisch-Hallisches | A         | Red    |
| YueLargeWhite                                                                                                                                                                                                                                                                                 | 1         | AY230822    | Sus scrofa |         |           | Domestic    | Large White           | A         | Red    |
| YueGermLandrace                                                                                                                                                                                                                                                                               | 1         | AY230823    | Sus scrofa |         |           | Domestic    | German Landrace       |           | Red    |
| <b>Code:</b> This column lists the code name used in this study for each of the samples published by previous studies. These codes are also listed in the Haplotype Table S4.                                                                                                                 |           |             |            |         |           |             |                       |           |        |
| <b># of Pigs:</b> All but three of the references whose published sequences are used in this study assigned a GenBank accession number to every individual pig. For those publications, the number placed in this column of the table is 1. The three studies(6-8) which assigned GenBank num |           |             |            |         |           |             |                       |           |        |

**Table 4. A list of pig sequences from previous studies(1-11) and additional sequences deposited on GenBank from four unpublished studies.**

| Code                                                                                                                                                                                                                                                                                             | # of pigs                                                                                                                                                                                                                   | Accession # | Species | Country | Location | Status | Breed | Haplotype | Group |
|--------------------------------------------------------------------------------------------------------------------------------------------------------------------------------------------------------------------------------------------------------------------------------------------------|-----------------------------------------------------------------------------------------------------------------------------------------------------------------------------------------------------------------------------|-------------|---------|---------|----------|--------|-------|-----------|-------|
| <b>Status:</b> The assigned status of “wild”, “feral”, or “domestic” was determined by the publication in which these samples were originally published. The wild status of a handful of samples is called into question given their genetic sequences. Those specimens are discussed in greater |                                                                                                                                                                                                                             |             |         |         |          |        |       |           |       |
| <b>Group:</b> This column indicates in which general group (Red, Orange, Yellow, or Grey) on the trees depicted in Figs 1 and S1 the sample belongs. The label ‘nd’ means this sample is not depicted on the trees.                                                                              |                                                                                                                                                                                                                             |             |         |         |          |        |       |           |       |
| 1                                                                                                                                                                                                                                                                                                |                                                                                                                                                                                                                             |             |         |         |          |        |       |           |       |
|                                                                                                                                                                                                                                                                                                  | Alves, E., Ovilo, C., Rodriguez, M. C. & Silio, L. (2003) <i>Animal Genetics</i> <b>34</b> , 319-324.                                                                                                                       |             |         |         |          |        |       |           |       |
| 2                                                                                                                                                                                                                                                                                                |                                                                                                                                                                                                                             |             |         |         |          |        |       |           |       |
|                                                                                                                                                                                                                                                                                                  | Giuffra, E., Kijas, J. M. H., Amarger, V., Carlborg, O., Jeon, J. T. & Andersson, L. (2000) <i>Genetics</i> <b>154</b> , 1785-1791.                                                                                         |             |         |         |          |        |       |           |       |
| 3                                                                                                                                                                                                                                                                                                |                                                                                                                                                                                                                             |             |         |         |          |        |       |           |       |
|                                                                                                                                                                                                                                                                                                  | Kijas, J. M. H. & Andersson, L. (2001) <i>Journal of Molecular Evolution</i> <b>52</b> , 302-308.                                                                                                                           |             |         |         |          |        |       |           |       |
| 4                                                                                                                                                                                                                                                                                                |                                                                                                                                                                                                                             |             |         |         |          |        |       |           |       |
|                                                                                                                                                                                                                                                                                                  | Randi, E., D'Huart, J. P., Lucchini, V. & Aman, R. (2002) <i>Mammalian Biology</i> <b>67</b> , 91-96.                                                                                                                       |             |         |         |          |        |       |           |       |
| 5                                                                                                                                                                                                                                                                                                |                                                                                                                                                                                                                             |             |         |         |          |        |       |           |       |
|                                                                                                                                                                                                                                                                                                  | Larson, G., Dobney, K., Albarella, U., Fang, M. Y., Matisoo-Smith, E., Robins, J., Lowden, S., Finlayson, H., Brand, T., Willerslev, E., Rowley-Conwy, P., Andersson, L. & Cooper, A. (2005) <i>Science</i> <b>307</b> , 16 |             |         |         |          |        |       |           |       |
| 6                                                                                                                                                                                                                                                                                                |                                                                                                                                                                                                                             |             |         |         |          |        |       |           |       |
|                                                                                                                                                                                                                                                                                                  | Watanobe, T., Okumura, N., Ishiguro, N., Nakano, M., Matsui, A., Sahara, M. & Komatsu, M. (1999) <i>Molecular Ecology</i> <b>8</b> , 1509-1512.                                                                             |             |         |         |          |        |       |           |       |
| 7                                                                                                                                                                                                                                                                                                |                                                                                                                                                                                                                             |             |         |         |          |        |       |           |       |
|                                                                                                                                                                                                                                                                                                  | Watanobe, T., Ishiguro, N., Okumura, N., Nakano, M., Matsui, A., Hongo, H. & Ushiro, H. (2001) <i>Journal of Molecular Evolution</i> <b>52</b> , 281-289.                                                                   |             |         |         |          |        |       |           |       |
| 8                                                                                                                                                                                                                                                                                                |                                                                                                                                                                                                                             |             |         |         |          |        |       |           |       |
|                                                                                                                                                                                                                                                                                                  | Okumura, N., Kurosawa, Y., Kobayashi, E., Watanobe, T., Ishiguro, N., Yasue, H. & Mitsuhashi, T. (2001) <i>Animal Genetics</i> <b>32</b> , 139-147.                                                                         |             |         |         |          |        |       |           |       |
| 9                                                                                                                                                                                                                                                                                                |                                                                                                                                                                                                                             |             |         |         |          |        |       |           |       |
|                                                                                                                                                                                                                                                                                                  | Gongora, J., Fleming, P., Spencer, P. B., Mason, R., Garkavenko, O., Meyer, J. N., Droegemueller, C., Lee, J. H. & Moran, C. (2004) <i>Mol Phylogenet Evol</i> <b>33</b> , 339-48.                                          |             |         |         |          |        |       |           |       |
| 10                                                                                                                                                                                                                                                                                               |                                                                                                                                                                                                                             |             |         |         |          |        |       |           |       |
|                                                                                                                                                                                                                                                                                                  | Gongora, J., Peltoniemi, O. A. T., Tammen, I., Raadsma, H. & Moran, C. (2003) <i>Acta Agriculturae Scandinavica Section a-Animal Science</i> <b>53</b> , 161-165.                                                           |             |         |         |          |        |       |           |       |
| 11                                                                                                                                                                                                                                                                                               |                                                                                                                                                                                                                             |             |         |         |          |        |       |           |       |
|                                                                                                                                                                                                                                                                                                  | Ursing, B. M. & Arnason, U. (1998) <i>Journal of Molecular Evolution</i> <b>47</b> , 302-306.                                                                                                                               |             |         |         |          |        |       |           |       |
