# Supplementary material
Source: PubMed Central journal article supplement (PMC2000515)
Supplement: pnas_0703411104_7.pdf [file pnas_0703411104_7.pdf]

| Table 5. A list of all novel obtained, extracted, and sequenced ancient specimens. |        |              |         |        |                   |         |                             |                     |                           |           |                           |                                       |                     |                   |                                                             |      |           |
|------------------------------------------------------------------------------------|--------|--------------|---------|--------|-------------------|---------|-----------------------------|---------------------|---------------------------|-----------|---------------------------|---------------------------------------|---------------------|-------------------|-------------------------------------------------------------|------|-----------|
| Extract                                                                            | Cloned | Exter Replic | Source  | Samp # | Spec. #           | Country | Location                    | Site code           | Site type                 | Context   | Phase                     | Dating                                | Wild/Dom            | Element           | Notes                                                       | ANC1 | Haplotype |
| <b>NEAR EAST</b>                                                                   |        |              |         |        |                   |         |                             |                     |                           |           |                           |                                       |                     |                   |                                                             |      |           |
| <b>Armenia</b>                                                                     |        |              |         |        |                   |         |                             |                     |                           |           |                           |                                       |                     |                   |                                                             |      |           |
| GL343                                                                              |        |              | NM2     | 32     | 77                | Armenia |                             | Khatunarkh          | open, drv                 |           | 5th millennium            | 5th millennium BC uncal?              | wild                | lower P4+M1+M2    |                                                             |      |           |
| GL347                                                                              |        |              | NM2     | 33     |                   | Armenia |                             | Khatunarkh          | open, drv                 |           | 5th millennium            | 5th millennium BC uncal?              | undetermined        | Upper M3          |                                                             |      |           |
| GL376                                                                              |        |              | NM2     | 15     | 163               | Armenia | nr Yerevan                  | Shengeviti          | open, drv                 |           | late 4th-early 3rd millen | late 4th-early 3rd mill BC uncal?     | undetermined        | lower P2          |                                                             |      | ANC-Am2T  |
| GL350                                                                              |        |              | NM2     | 16     | 210               | Armenia | nr Yerevan                  | Shengeviti          | open, drv                 |           | late 4th-early 3rd millen | late 4th-early 3rd mill BC uncal?     | undetermined        | Metacarpal        |                                                             |      | ANC-Am2T  |
| GL995                                                                              |        |              | NM2     | 30     | 196/2             | Armenia | nr Yerevan                  | Shengeviti          | open, drv                 |           | 3rd millennium            | 3rd millennium BC uncal?              | undetermined        | lower M3          |                                                             |      |           |
| GL886                                                                              |        |              | NM2     | 12     | 34                | Armenia |                             | Mokhra-Blur         | open, drv                 |           | Early-Mid 3rd millennium  | Early-Mid 3rd millennium BC uncal?    | undetermined        | lower premolar    |                                                             |      |           |
| GL897                                                                              |        |              | NM2     | 13     |                   | Armenia |                             | Mokhra-Blur         | open, drv                 |           | Early-Mid 3rd millennium  | Early-Mid 3rd millennium BC uncal?    | undetermined        | lower M1/2        |                                                             |      |           |
| GL992                                                                              |        |              | NM2     | 25     |                   | Armenia | Lake Sevan                  | Sevan               | open, drv                 |           | 2nd millennium BC         | 2nd millennium BC uncal?              | domestic?           | lower P4          |                                                             |      | ANC-Am1T  |
| GL896                                                                              |        |              | NM2     | 1      | 10                | Armenia | Lchashen                    | Lchashen            | graveyard, open, drv      |           | Late Bronze/early Iron    | 13th-9th cent. BC                     | domestic?           | Lower I           |                                                             |      | ANC-Am1T  |
| GL187                                                                              |        | X            | NM2     | 1      |                   | Armenia | Lake Sevan                  | Lchashen            | graveyard, open, drv      |           | Late Bronze/early Iron    | 13th-9th cent. BC                     | domestic?           | Lower M1/2        |                                                             |      | ANC-Am1T  |
| GL188                                                                              |        |              | NM2     | 4      | 38                | Armenia | Lake Sevan                  | Lchashen            | graveyard, open, drv      |           | Late Bronze/early Iron    | 13th-9th cent. BC                     | domestic?           | Lower M1/2        |                                                             |      | ANC-Am1T  |
| GL891                                                                              |        | X            | NM2     | 10     |                   | Armenia | Lake Sevan                  | Lchashen            | graveyard, open, drv      |           | Late Bronze/early Iron    | 13th-9th cent. BC                     | domestic?           | lower I           |                                                             |      | ANC-Am1T  |
| GL892                                                                              |        |              | NM2     | 28     | 476               | Armenia | Lchashen                    | Lchashen            | open, drv                 |           | Late Bronze/early Iron    | 13th-9th cent. BC                     | undetermined        | lower I           |                                                             |      | ANC-Am1T  |
| GL866                                                                              |        |              | NM2     | 20     |                   | Armenia | West of Yerevan             | Nor Armavir         | open, drv                 |           | Urartian (late iron)      | 9th-7th cent. BC                      | undetermined        | lower P           |                                                             |      |           |
| GL862                                                                              |        |              | NM2     | 21     |                   | Armenia | West of Yerevan             | Nor Armavir         | open, drv                 |           | Urartian (late iron)      | 9th-7th cent. BC                      | undetermined        | lower P           |                                                             |      |           |
| GL881                                                                              |        |              | NM2     | 23     |                   | Armenia |                             | Pilgorat            | open, drv                 |           | 8th-5th cent BC           | 8th-5th cent BC                       | domestic?           | lower dP4         |                                                             |      | ANC-Aside |
| GL861                                                                              |        |              | NM2     | 27     |                   | Armenia |                             | Timshir             | open, drv                 |           | 8th-5th cent BC           | 8th-5th cent BC                       | undetermined        | P2+dP5            |                                                             |      | ANC-Aside |
| GL895                                                                              |        |              | NM2     | 17     |                   | Armenia |                             | Sevkar              | open, drv                 |           | 7th-5th cent BC           | 7th-5th cent BC                       | domestic            | lower M2          |                                                             |      | ANC-Aside |
| GL994                                                                              |        |              | NM2     | 22     |                   | Armenia | southern Armenia            | Artashat            | open, drv                 |           | Late Antique              | 4th-5th cent AD                       | undetermined        | lower I           |                                                             |      |           |
| GL812                                                                              |        |              | NM2     | 35     |                   | Armenia |                             | Benjamin            | open, drv                 |           | 1st half 1st mill AD      | 1st half 1st mill AD                  | undetermined        | Upper M3          |                                                             |      | ANC-Aside |
| GL865                                                                              |        |              | NM2     | 37     | 366               | Armenia |                             | Isakaektsi          | open, drv                 |           | 13th cent AD              | 13th cent AD                          | domestic            | lower M1          |                                                             |      | ANC-Aside |
| GL864                                                                              |        |              | NM2     | 38     |                   | Armenia |                             | Isakaektsi          | open, drv                 |           | 13th cent AD              | 13th cent AD                          | undetermined        | upper M3          |                                                             |      | ANC-Aside |
| <b>Iran</b>                                                                        |        |              |         |        |                   |         |                             |                     |                           |           |                           |                                       |                     |                   |                                                             |      |           |
| GL291                                                                              |        |              | FMNH    |        | KMD7              | Iran    | Zagros region               | Asiab               | Semi-permanent settlement |           | Karim Shahr culture       | 10,200-7,600 BC (cal)                 | undetermined        | lower premolar    |                                                             |      |           |
| GL503                                                                              |        |              | NM2     |        |                   | Iran    | Fars Province               | Toli-Bashi          | mound                     |           | Neolithic-Chalcolithic    | 6200 - 4500 BC cal                    | wild                | mandible          | out side sectors, but in site next to the Chalco Neo levels |      |           |
| GL349                                                                              |        |              | RM2     | 12     |                   | Iran    | Kerman Province             | Tepe Yahya          | Tepe/Tel (mound)          | 159-50    | Period IV B 2             | 4500 BC                               | Wild?               | astr              |                                                             |      |           |
| GL351                                                                              |        |              | RM2     | 13     |                   | Iran    | Kerman Province             | Tepe Yahya          | Tepe/Tel (mound)          | 542-09    | Period IV C.1             | 3200 BC                               | domestic?           | M1/2              |                                                             |      |           |
| GL504                                                                              |        |              | NM2     |        | D129              | Iran    | Mazandaran Province         | Gohar Tappeh        | mound                     | AXI VII   | Pc. Bronze                | -3000BC                               | wild                | mandible          |                                                             |      |           |
| GL711                                                                              |        |              | NM2     |        | D.8159            | Iran    | Mazandaran Province         | Gohar Tappeh        | mound                     | TAZIXXIV  | Pc. Bronze                | -3000BC                               | wild                | maxillary teeth   |                                                             |      |           |
| <b>Iraq</b>                                                                        |        |              |         |        |                   |         |                             |                     |                           |           |                           |                                       |                     |                   |                                                             |      |           |
| GL315                                                                              |        |              | FMNH    |        | KMD11-PM11827     | Iraq    | nr Tibriz                   | Palegawra           | Cave                      |           | Zarziian culture          | 14,000-12,000 BC (cal)                | wild                | incisor           |                                                             |      |           |
| GL296                                                                              |        | X            | FMNH    |        | KMD12-PM11812     | Iraq    | nr Tibriz                   | Palegawra           | Cave                      |           | Zarziian culture          | 14,000-12,000 BC (cal)                | wild                | upper premolar    |                                                             |      |           |
| GL482                                                                              |        |              | FMNH    |        | KMD13-PM11813     | Iraq    | nr Tibriz                   | Palegawra           | Cave                      |           | Zarziian culture          | 14,000-12,000 BC (cal)                | wild                | carpal            |                                                             |      |           |
| GL326                                                                              |        |              | FMNH    |        | KMD1              | Iraq    | nr Kirkuk                   | Jarmo (Qala'at)     | Village                   | ?         | PPNB                      | 7,600-6,900 BP (cal)                  | undetermined        | lower incisor     |                                                             |      |           |
| GL328                                                                              |        |              | FMNH    |        | KMD2              | Iraq    | nr Kirkuk                   | Jarmo (Qala'at)     | Village                   | ?         | PPNB                      | 7,600-6,900 BP (cal)                  | undetermined        | lower incisor     |                                                             |      |           |
| GL476                                                                              |        |              | FMNH    |        | KMD3              | Iraq    | nr Kirkuk                   | Jarmo (Qala'at)     | Village                   | ?         | PPNB                      | 7,600-6,900 BP (cal)                  | undetermined        | upper incisor     |                                                             |      |           |
| GL477                                                                              |        |              | FMNH    |        | KMD4              | Iraq    | nr Kirkuk                   | Jarmo (Qala'at)     | Village                   | ?         | PPNB                      | 7,600-6,900 BP (cal)                  | undetermined        | mandible          |                                                             |      |           |
| GL479                                                                              |        |              | FMNH    |        | KMD5              | Iraq    | nr Kirkuk                   | Jarmo (Qala'at)     | Village                   | ?         | PPNB                      | 7,600-6,900 BP (cal)                  | undetermined        | mandible          |                                                             |      |           |
| GL480                                                                              |        |              | FMNH    |        | KMD6              | Iraq    | nr Kirkuk                   | Jarmo (Qala'at)     | Village                   | ?         | PPNB                      | 7,600-6,900 BP (cal)                  | undetermined        | mandible          |                                                             |      |           |
| GL302                                                                              |        |              | FMNH    |        | KMD8              | Iraq    | 34km S Kirkuk               | Matarrah            | Tell (Mound)              |           |                           | 6,900-5,800 BC (cal)                  | domestic?           | lower incisor     |                                                             |      |           |
| GL303                                                                              |        |              | FMNH    |        | KMD9              | Iraq    | 34km S Kirkuk               | Matarrah            | Tell (Mound)              |           |                           | 6,900-5,800 BC (cal)                  | domestic?           | lower incisor     |                                                             |      |           |
| GL481                                                                              |        |              | FMNH    |        | KMD10             | Iraq    | 34km S Kirkuk               | Matarrah            | Tell (Mound)              |           |                           | 6,900-5,800 BC (cal)                  | domestic?           | incisor           |                                                             |      |           |
| <b>Israel</b>                                                                      |        |              |         |        |                   |         |                             |                     |                           |           |                           |                                       |                     |                   |                                                             |      |           |
| A183                                                                               |        |              | LKH     | IS-C1  | 30/93, 35/10      | Israel  | 12km south of Haifa         | Tel Hreiz           | submerged coastal         |           | Late pottery Neolithic    | 7th millennium uncal. BP              | undetermined        | scapula           |                                                             |      |           |
| A182                                                                               |        |              | LKH     | IS-C2  | 30/93-9           | Israel  | 12km south of Haifa         | Neuwe Yam           | submerged coastal         |           | Late pottery Neolithic    | 7th millennium uncal. BP              | undetermined        | mandible          |                                                             |      |           |
| A184                                                                               |        |              | LKH     | IS-C3  | Bld 11 Ht 60-80   | Israel  | 12km south of Haifa         | Atlit Yam           | submerged coastal         |           | PPNC                      | end 9th - 1st 1/2 8th mill. Uncal. BP | undetermined        | femur             |                                                             |      |           |
| A185                                                                               |        |              | LKH     | IS-C5  | C4 Bsk1 1333 Ht 6 | Israel  | 12 km west of Jerusalem     | Abu Ghosh           |                           |           | Middle to Late PPNB       | 7000-4000 BC                          | undetermined        | ulna              |                                                             |      |           |
| GL449                                                                              |        |              | JL-T    | 1      |                   | Israel  | 22 miles S.W. of Jerusalem  | Tell Miane-Ekron    | Tell (Mound)              |           | Iron Age                  | 12th to 10th centuries B.C.           | domestic            | Jaw frag          | associated with Philistine occupation?                      |      |           |
| GL446                                                                              |        |              | JL-T    | 4      |                   | Israel  | 23 miles S.W. of Jerusalem  | Tell Miane-Ekron    | Tell (Mound)              |           | Iron Age                  | 12th to 10th centuries B.C.           | domestic            | Jaw frag          | associated with Philistine occupation?                      |      |           |
| <b>Syria</b>                                                                       |        |              |         |        |                   |         |                             |                     |                           |           |                           |                                       |                     |                   |                                                             |      |           |
| GL1014                                                                             |        |              | RB/L-DV | 1      | Tell Aswad        | Syria   | Damascus                    | Tell Aswad          | open field, Tell          | G16       | Middle PPNB               | ca. 8000-7500 cal BC                  | domestic            | femur diaphyses   |                                                             |      |           |
| GL348                                                                              |        |              | CC      | 2      | 44/3              | Syria   |                             | Tell Sabi Abyad     |                           |           | Q14 - 7                   | 7th/8th Mil.                          | 7th/8th Mil. BC     | undetermined      | molar                                                       |      |           |
| GL181                                                                              |        |              | CC      | 5      | 81/20             | Syria   |                             | Tell Sabi Abyad     |                           |           | R13 - 9                   | 7th/8th Mil.                          | 7th/8th Mil. BC     | undetermined      | tooth                                                       |      |           |
| GL433                                                                              |        |              | CC      | 6      | 256/1             | Syria   |                             | Tell Sabi Abyad 91  |                           |           | Q13 - 85                  | 7th/8th Mil.                          | 7th/8th Mil. BC     | undetermined      | molar                                                       |      |           |
| GL352                                                                              |        |              | CC      | 7      | 219/28            | Syria   |                             | Tell Sabi Abyad 88  |                           |           | Q13 - 74                  | 7th/8th Mil.                          | 7th/8th Mil. BC     | undetermined      | tooth                                                       |      |           |
| GL182                                                                              |        |              | AM      | 10     | F.81.4            | Syria   | Hassake province, NE Syria  | CB01 (Chagar Bazar) | Tell (mound)              |           | GIII L 39 2               | II                                    | 1st 1/2 2nd mill BC | domestic          | tooth                                                       |      |           |
| GL473                                                                              |        |              | AM      | 9      | D398, CB959       | Syria   | Hassake province, NE Syria  | CB09 (Chagar Bazar) | Tell (mound)              |           | AL L 16.3                 | II                                    | 1st 1/2 2nd mill BC | incisor           |                                                             |      |           |
| GL484                                                                              |        |              | AM      | 8      | E.224.1           | Syria   | Hassake province, NE Syria  | CB00 (Chagar Bazar) | Tell (mound)              |           | AL L38.1                  | II                                    | 1st 1/2 2nd mill BC | domestic          | incisor                                                     |      | ANC-Am1T  |
| GL180                                                                              |        |              | RM1     |        | A1200.1           | Syria   | Brak, N. Syria              | Tell Brak           | Tell (mound)              | HN        | Late ED/Akkadian          | c 2400 BC                             | domestic            | astragalus        |                                                             |      |           |
| GL179                                                                              |        |              | RM1     |        | A553.1            | Syria   | Brak, N. Syria              | Tell Brak           | Tell (mound)              | TB96 51   | Late ED/Akkadian          | c 2350 BC                             | domestic            | isolated teeth    |                                                             |      |           |
| GL430                                                                              |        |              | RM1     |        | A508.1            | Syria   | Brak, N. Syria              | Tell Brak           | Tell (mound)              | TB96 328  | Late ED/Akkadian          | c 1700 BC                             | domestic            | rib               |                                                             |      |           |
| GL494                                                                              |        |              | RM1     |        | A184.3            | Syria   | Brak, N. Syria              | Tell Brak           | Tell (mound)              | HP        | Middle Bronze Age         |                                       | domestic            | metatarsal        |                                                             |      |           |
| <b>Turkey</b>                                                                      |        |              |         |        |                   |         |                             |                     |                           |           |                           |                                       |                     |                   |                                                             |      |           |
| GL353                                                                              |        |              | RM2     | 8      |                   | Turkey  | Southwest Turkey            | Erbaba              |                           | 338IWCi   |                           |                                       | undetermined        | mand incis        |                                                             |      |           |
| GL363                                                                              |        |              | RM2     | 10     |                   | Turkey  | Southwest Turkey            | Erbaba              |                           | 186 CKIII |                           |                                       | undetermined        | mand incis        |                                                             |      |           |
| GL165                                                                              |        |              | HH      | 86     |                   | Turkey  | SE Anatolia near Divarbakir | Cayonu Tepesi       | Village                   | GHD 5-70  | g                         | 9400-9100 BP                          | undetermined        | Jaw frag          | PPNA-EPPNB                                                  |      |           |
| GL164                                                                              |        | X            | HH      | 84     | BK 2718           | Turkey  | SE Anatolia near Divarbakir | Cayonu Tepesi       | Village                   | 18M 1-3   | C/LR+P                    | 8600-8000+ BP                         | undetermined        | Jaw frag          | LPPNB-post PPNC                                             |      |           |
| GL166                                                                              |        |              | HH      | 88     | 3378              | Turkey  | SE Anatolia near Divarbakir | Cayonu Tepesi       | Village                   | 25L 3-79  |                           | 8600-8300 BP                          | undetermined        | Jaw frag          | LPPNB                                                       |      |           |
| GL163                                                                              |        |              | HH      | 81     | BK1947            | Turkey  | SE Anatolia near Divarbakir | Cayonu Tepesi       | Village                   | 30K 3-0   | Poinco                    | Late 8th Millennium BP                | wild?               | Jaw frag          | Pot Neo (Post PPNC Levantine chronology)                    |      |           |
| GL167                                                                              |        |              | HH      | 90     | 0                 | Turkey  | SE Anatolia near Divarbakir | Cayonu Tepesi       | Village                   | BG 4-2    | sp                        |                                       | undetermined        | Jaw frag          |                                                             |      |           |
| GL339                                                                              |        |              | RR      | 11     |                   | Turkey  |                             | Halim Cemi          |                           |           | H4.92 5G23-810            |                                       | undetermined        | maxilla           |                                                             |      |           |
| GL354                                                                              |        |              | RR      | 14     |                   | Turkey  |                             | Halim Cemi          |                           |           | HC92 6F7 718              |                                       | undetermined        | max,permolar      |                                                             |      |           |
| GL426                                                                              |        |              | RR      |        | 6F7 514           | Turkey  |                             | Halim Cemi          |                           |           | 6F7 514                   |                                       | undetermined        | mandible fragment |                                                             |      |           |
| GL373                                                                              |        |              | RR      |        | 6F7 703           | Turkey  |                             | Halim Cemi          |                           |           | 6F7 703                   |                                       | undetermined        | Mandible fragment |                                                             |      |           |
| GL377                                                                              |        |              | RR      |        | 6F7 502           | Turkey  |                             | Halim Cemi          |                           |           | 6F7 502                   |                                       | undetermined        | Mandible fragment |                                                             |      |           |

| Table 5. A list of all novel obtained, extracted, and sequenced ancient specimens. |        |              |        |        |                    |            |                             |                  |                        |              |                   |                            |                               |            |                                   |                                |            |
|------------------------------------------------------------------------------------|--------|--------------|--------|--------|--------------------|------------|-----------------------------|------------------|------------------------|--------------|-------------------|----------------------------|-------------------------------|------------|-----------------------------------|--------------------------------|------------|
| Extract                                                                            | Cloned | Exter Replic | Source | Samp # | Spec. #            | Country    | Location                    | Site code        | Site type              | Context      | Phase             | Dating                     | Wild/Dom                      | Element    | Notes                             | ANC1                           | Haplotype  |
| GL392                                                                              |        |              | RR     |        | #F7 1201           | Turkey     |                             | Halim Cemi       |                        | 6F7 1201     |                   |                            |                               |            |                                   |                                |            |
| GL969                                                                              |        |              | HH     | 1      | 177                | Turkey     | SE Anatolia near Diyarbakir | Salat Cami Yani  | Village                |              |                   | earliest pottery Neolithic | 2nd half of 7th millennium BC | domestic   | astragalus                        |                                |            |
| GL970                                                                              | X      |              | HH     | 2      | 222                | Turkey     | SE Anatolia near Diyarbakir | Salat Cami Yani  | Village                |              |                   | earliest pottery Neolithic | 2nd half of 7th millennium BC | domestic   | caicaneum                         |                                |            |
| UAE                                                                                |        |              |        |        |                    |            |                             |                  |                        |              |                   |                            |                               |            |                                   |                                |            |
| GL149                                                                              |        |              | PK     | 1      |                    | UAE        |                             | Kush             |                        | A-1900       | Sasanian culture  | 5th - 6th century AD       | domestic                      | Metapodial | Sasanian Islamic occupation mound |                                |            |
| Pakistan                                                                           |        |              |        |        |                    |            |                             |                  |                        |              |                   |                            |                               |            |                                   |                                |            |
| GL151                                                                              |        |              | MM2    | 1      |                    | Pakistan   |                             | Sehwan Sharif    |                        |              |                   | 1350 BC                    | undetermined                  | molar      |                                   |                                |            |
| <b>EAST / CENTRAL EUROPE</b>                                                       |        |              |        |        |                    |            |                             |                  |                        |              |                   |                            |                               |            |                                   |                                |            |
| Croatia                                                                            |        |              |        |        |                    |            |                             |                  |                        |              |                   |                            |                               |            |                                   |                                |            |
| GL982                                                                              |        |              | PM1    | 3      | Pup98 1161.1 (203  | Croatia    | 15km w of Rjeika            | Pupicina Cave    | Cave                   | Q            | Mesolithic        | Beta-131626, 9450-10050    | wild?                         |            | Maxilla with P4-M3                |                                |            |
| GL983                                                                              |        |              | PM1    | 9      | Pup98 1161.7 (204  | Croatia    | 15km w of Rjeika            | Pupicina Cave    | Cave                   | Q            | Mesolithic        | Beta-131626, 9450-10050    | wild?                         |            | Maxilla with M1-M2                |                                |            |
| GL981                                                                              |        |              | PM1    | 10     | Pup98 1207.17 (205 | Croatia    | 15km w of Rjeika            | Pupicina Cave    | Cave                   | Q            | Mesolithic        | Beta-131626, 9450-10050    | wild                          |            | Maxilla with P3-P4                |                                |            |
| GL979                                                                              |        |              | PM1    | 5      | Pup 61 (1261)      | Croatia    | 15km w of Rjeika            | Pupicina Cave    | Cave                   | Horizon O3   | Mesolithic        | ~9500 Cal BC               | wild?                         |            | upper I1                          |                                |            |
| GL979                                                                              |        |              | PM1    | 2      | Pup59 1250         | Croatia    | 15km w of Rjeika            | Pupicina Cave    | Cave                   | O2           | Mesolithic        | 9225-9310 Cal BC           | wild?                         |            | Humerus, distal                   | conjoins with Pup 59, 1328     | ANC-Italy  |
| GL980                                                                              |        |              | PM1    | 1      | Pup96 229.11       | Croatia    | 15km w of Rjeika            | Pupicina Cave    | Cave                   | N            | Mesolithic        | 8740-9220 Cal BC           | wild?                         |            | Metatarsal 4                      | Articulates with Pup96 228, 16 | ANC-Italy  |
| GL726                                                                              |        |              | PM1    | 1      | Pup97 771C 24      | Croatia    | 15km w of Rjeika            | Pupicina Cave    | Cave                   | Horizon M1   | Mesolithic        | 8500 cal BC                | wild?                         |            | lower incisor                     |                                | ANC-Italy  |
| GL727                                                                              | X      | X            | PM1    | 2      | Pup97 768D 38      | Croatia    | 15km w of Rjeika            | Pupicina Cave    | Cave                   | Horizon M1   | Mesolithic        | 8500 cal BC                | wild?                         |            | upper canine                      |                                | ANC-Italy  |
| GL728                                                                              |        |              | PM1    | 3      | Pup87 564, 37      | Croatia    | 15km w of Rjeika            | Pupicina Cave    | Cave                   | Horizon G    | Late Neolithic    | 4300 cal BC                | domestic?                     |            | astragalus                        |                                | ANC-Y2-5A  |
| GL729                                                                              |        |              | PM1    | 4      | Pup 17 (24)        | Croatia    | 15km w of Rjeika            | Pupicina Cave    | Cave                   | Horizon F    | Mid Bronze        | 1500 cal BC                | domestic?                     |            |                                   |                                | ANC-Csidae |
| Czech Republic                                                                     |        |              |        |        |                    |            |                             |                  |                        |              |                   |                            |                               |            |                                   |                                |            |
| GL30                                                                               |        |              | PM2    | 1      |                    | Czech Rep. | Bohemia                     | HOMOLKA          | open hilltop site, dry | 731          | ENEolithic        | c. 2700-2300 BC            | undetermined                  |            | fem lo can                        |                                | ANC-Csidae |
| GL31                                                                               |        |              | PM2    | 2      |                    | Czech Rep. | Bohemia                     | HOMOLKA          | open hilltop site, dry | 7            | ENEolithic        | c. 2700-2300 BC            | undetermined                  |            | fem lo can                        |                                |            |
| GL32                                                                               |        |              | PM2    | 3      |                    | Czech Rep. | Bohemia                     | HOMOLKA          | open hilltop site, dry | 39-36-591    | ENEolithic        | c. 2700-2300 BC            | undetermined                  |            | fem up can                        |                                |            |
| GL33                                                                               |        |              | PM2    | 4      |                    | Czech Rep. | Bohemia                     | HOMOLKA          | open hilltop site, dry | 56           | ENEolithic        | c. 2700-2300 BC            | undetermined                  |            | max M3                            |                                | ANC-Aside  |
| GL34                                                                               |        |              | PM2    | 5      |                    | Czech Rep. | Bohemia                     | HOMOLKA          | open hilltop site, dry | 66           | ENEolithic        | c. 2700-2300 BC            | undetermined                  |            | fem lo can                        |                                | ANC-Aside  |
| GL35                                                                               |        |              | PM2    | 6      |                    | Czech Rep. | Bohemia                     | HOMOLKA          | open hilltop site, dry | 747          | ENEolithic        | c. 2700-2300 BC            | undetermined                  |            | dp4                               |                                | ANC-Aside  |
| GL36                                                                               |        |              | PM2    | 7      |                    | Czech Rep. | Bohemia                     | HOMOLKA          | open hilltop site, dry | 64           | ENEolithic        | c. 2700-2300 BC            | undetermined                  |            | mand inc                          |                                | ANC-Aside  |
| GL37                                                                               |        |              | PM2    | 8      |                    | Czech Rep. | Bohemia                     | HOMOLKA          | open hilltop site, dry | 728          | ENEolithic        | c. 2700-2300 BC            | wild                          |            | mand                              |                                | ANC-Csidae |
| GL38                                                                               |        |              | PM2    | 9      |                    | Czech Rep. | Bohemia                     | HOMOLKA          | open hilltop site, dry | 20           | ENEolithic        | c. 2700-2300 BC            | wild?                         |            | mand                              |                                | ANC-Csidae |
| GL39                                                                               |        |              | PM2    | 10     |                    | Czech Rep. | Bohemia                     | HOMOLKA          | open hilltop site, dry | 732          | ENEolithic        | c. 2700-2300 BC            | domestic                      |            | mand M3                           |                                | ANC-Csidae |
| GL40                                                                               |        |              | PM2    | 11     |                    | Czech Rep. | Bohemia                     | HOMOLKA          | open hilltop site, dry | 100          | ENEolithic        | c. 2700-2300 BC            | undetermined                  |            | ast                               |                                |            |
| GL41                                                                               |        |              | PM2    | 12     |                    | Czech Rep. | Bohemia                     | HOMOLKA          | open hilltop site, dry | 102          | ENEolithic        | c. 2700-2300 BC            | wild?                         |            | calc                              |                                | ANC-Csidae |
| Germany                                                                            |        |              |        |        |                    |            |                             |                  |                        |              |                   |                            |                               |            |                                   |                                |            |
| GL115                                                                              | X      |              | NB     | 1      |                    | Germany    | Southern Germany            | Allendorf        | open site, dry         | 2            | Epipalaeo         | 12,000-10,000 BC           | wild                          |            | lower M1/2                        |                                | ANC-Csidae |
| GL116                                                                              |        |              | NB     | 2      |                    | Germany    | Southern Germany            | Allendorf        | open site, dry         | 2            | Epipalaeo         | 12,000-10,000 BC           | wild                          |            | lower P2+P3+P4                    |                                | ANC-Csidae |
| GL117                                                                              |        |              | NB     | 3      |                    | Germany    | Southern Germany            | Allendorf        | open site, dry         | 3a           | Epipalaeo         | 12,000-10,000 BC           | wild                          |            | astragalus                        |                                |            |
| GL119                                                                              |        |              | SH     | 7      |                    | Germany    | North-East Germany          | Friesack         | open site, waterlogged |              | Mesolithic III/II | 8,500-7,500 BC cal         | wild                          |            | upper incisor                     |                                | ANC-Csidae |
| GL538                                                                              |        |              | SH     | 9      |                    | Germany    | North-East Germany          | Friesack         | open site, waterlogged |              | Mesolithic III/II | 8,500-7,500 BC cal         | wild                          |            | upper incisor                     |                                | ANC-Csidae |
| GL120                                                                              |        |              | SH     | 10     |                    | Germany    | North-East Germany          | Friesack         | open site, waterlogged |              | Mesolithic III/II | 8,500-7,500 BC cal         | wild                          |            | upper incisor                     |                                | ANC-Csidae |
| GL539                                                                              |        |              | SH     | 11     |                    | Germany    | North-East Germany          | Friesack         | open site, waterlogged |              | Mesolithic III/II | 8,500-7,500 BC cal         | wild                          |            | upper can fem                     |                                |            |
| GL121                                                                              |        |              | SH     | 12     |                    | Germany    | North-East Germany          | Friesack         | open site, waterlogged |              | Mesolithic III/II | 8,500-7,500 BC cal         | wild                          |            | upper can fem                     |                                | ANC-Csidae |
| GL122                                                                              |        |              | SH     | 16     |                    | Germany    | North-East Germany          | Friesack         | open site, waterlogged |              | Mesolithic III/II | 8,500-7,500 BC cal         | wild                          |            | upper incisor                     |                                | ANC-Aside  |
| GL118                                                                              |        |              | SH     | 17     |                    | Germany    | North-East Germany          | Friesack         | open site, waterlogged |              | Mesolithic IV     | 7,500-5,500 BC cal         | wild                          |            | lower premolar                    |                                |            |
| GL537                                                                              |        |              | SH     | 4      |                    | Germany    | North-East Germany          | Friesack         | open site, waterlogged |              | Mesolithic IV     | 7,500-5,500 BC cal         | wild                          |            | lower M3                          |                                |            |
| GL123                                                                              |        |              | HJD    | 21     | 76.471b            | Germany    | North-East Germany          | Eilsleben        | open site, dry         |              | LBK               | 5,500-5,000 BC cal         | wild                          |            | lower M3                          |                                | ANC-Csidae |
| GL124                                                                              |        |              | HJD    | 22     | 76.471b            | Germany    | North-East Germany          | Eilsleben        | open site, dry         |              | LBK               | 5,500-5,000 BC cal         | wild                          |            | lower incisor                     |                                | ANC-Csidae |
| GL975                                                                              |        |              | HJD    | 23     | 76.484a            | Germany    | North-East Germany          | Eilsleben        | open site, dry         |              | LBK               | 5,500-5,000 BC cal         | undetermined                  |            | lower premolar                    |                                |            |
| GL977                                                                              |        |              | HJD    | 24     | 83.828k            | Germany    | North-East Germany          | Eilsleben        | open site, dry         |              | LBK               | 5,500-5,000 BC cal         | domestic?                     |            | upper incisor                     |                                | ANC-Y1-6A  |
| GL972                                                                              |        |              | HJD    | 25     | 85.128u            | Germany    | North-East Germany          | Eilsleben        | open site, dry         |              | LBK               | 5,500-5,000 BC cal         | domestic?                     |            | upper incisor                     |                                | ANC-Y1-6A  |
| GL973                                                                              |        |              | HJD    | 27     | 85.138u            | Germany    | North-East Germany          | Eilsleben        | open site, dry         |              | LBK               | 5,500-5,000 BC cal         | domestic?                     |            | lower canine fe                   |                                | ANC-Y1-6A  |
| GL976                                                                              |        |              | HJD    | 28     | 88.485h            | Germany    | North-East Germany          | Eilsleben        | open site, dry         |              | LBK               | 5,500-5,000 BC cal         | domestic?                     |            | upper P3                          |                                | ANC-Y1-6A  |
| GL971                                                                              |        |              | HJD    | 29     | 80.83i             | Germany    | North-East Germany          | Eilsleben        | open site, dry         |              | LBK               | 5,500-5,000 BC cal         | domestic?                     |            | upper M1/2                        |                                |            |
| Greece                                                                             |        |              |        |        |                    |            |                             |                  |                        |              |                   |                            |                               |            |                                   |                                |            |
| GL359                                                                              |        |              | MM1    | 14     |                    | Greece     | Aegean                      | Cwest Youra      | small island, dry      | Layer 10     | Mesolithic        | 7530-7100 BC cal?          | wild                          |            | rib fraags                        |                                |            |
| GL381                                                                              |        |              | PH     | 1      |                    | Greece     | West Macedonia              | MAKRIVYALOS      | open, dry              | H42114       | II                | 5,400-4,500 BC             | wild                          |            | mand m3                           |                                |            |
| GL342                                                                              |        |              | PH     | 7      |                    | Greece     | West Macedonia              | MAKRIVYALOS      | open, dry              | O45302       | II                | 5,400-4,500 BC             | domestic                      |            | fem lo can                        |                                |            |
| GL462                                                                              |        |              | PH     | 10     |                    | Greece     | West Macedonia              | MAKRIVYALOS      | open, dry              | O0681009     | I                 | 5,400-4,500 BC             | domestic                      |            | mand m3                           |                                |            |
| GL340                                                                              |        |              | PH     | 11     |                    | Greece     | West Macedonia              | MAKRIVYALOS      | open, dry              | E0584014     | I                 | 5,400-4,500 BC             | domestic                      |            | mand m3                           |                                |            |
| GL369                                                                              |        |              | PH     | 13     |                    | Greece     | West Macedonia              | MAKRIVYALOS      | open, dry              | E59415       | I                 | 5,400-4,500 BC             | wild                          |            | mand m2-m3                        |                                |            |
| Hungary                                                                            |        |              |        |        |                    |            |                             |                  |                        |              |                   |                            |                               |            |                                   |                                |            |
| GL159                                                                              |        |              | LB     |        |                    | Hungary    |                             | Aquinum          |                        | kolossy sq.  | Roman             |                            |                               |            | law fragment                      |                                | ANC-Aside  |
| GL185                                                                              |        |              | LB     |        | BT 122             | Hungary    |                             | Balcsa-Torokvar  |                        | AD 1578-1661 | Upper Paleo       |                            |                               |            | law fragment                      |                                | ANC-Aside  |
| GL186                                                                              |        |              | LB     |        | BT 321             | Hungary    |                             | Balcsa-Torokvar  |                        | AD 1578-1667 | Upper Paleo       |                            |                               |            | law fragment                      |                                | ANC-Aside  |
| Italy                                                                              |        |              |        |        |                    |            |                             |                  |                        |              |                   |                            |                               |            |                                   |                                |            |
| GL818                                                                              |        |              | AT1    | 57     |                    | Italy      | Latium                      | Fossellone       | cave                   |              | F21 - Aurignacian | 28,000-23,000 BC           | wild                          |            | mand d1 sn                        |                                |            |
| GL1002                                                                             |        |              | AT1    | 58     |                    | Italy      | Latium                      | Fossellone       | cave                   |              | F21 - Aurignacian | 28,000-23,000 BC           | wild                          |            | mand I3 sn                        |                                |            |
| GL698                                                                              |        |              | AT1    | 3      |                    | Italy      | Liguria                     | Arene Candide    | cave                   | P6           | Upper Paleo       | 24,000-16,000 BC           | wild                          |            | mand I3                           |                                |            |
| GL820                                                                              |        |              | AT1    | 4      |                    | Italy      | Liguria                     | Arene Candide    | cave                   | M2           | Upper Paleo       | 24,000-16,000 BC           | wild                          |            | mand P                            |                                |            |
| GL832                                                                              |        |              | AT1    | 5      |                    | Italy      | Liguria                     | Arene Candide    | cave                   | M5           | Upper Paleo       | 24,000-16,000 BC           | wild                          |            | max P                             |                                |            |
| GL699                                                                              |        |              | AT1    | 6      |                    | Italy      | Latium                      | Palidoro         | cave                   | TL24         | Upper Paleo       | 14,000-13,000 BC           | undetermined                  |            | max I                             |                                |            |
| GL696                                                                              |        |              | AT1    | 1      |                    | Italy      | Apulia                      | Grotta Romanelli | cave                   | RV           | Upper Paleo       | 14,000-7,000 BC            | wild                          |            | max I2                            |                                |            |
| GL697                                                                              |        |              | AT1    | 2      |                    | Italy      | Apulia                      | Grotta Romanelli | cave                   | R70          | Upper Paleo       | 14,000-7,000 BC            | wild                          |            | max I                             |                                |            |
| GL703                                                                              |        |              | AT1    | 10     |                    | Italy      | Sicily                      | Grotta dell'Uzzo | cave                   | F15          | Late Mesol        | 8,500-6,500 BC cal         | wild                          |            | max I3                            |                                |            |
| GL844                                                                              |        |              | AT1    | 13     |                    | Italy      | Sicily                      | Grotta dell'Uzzo | cave                   | F17          | Late Mesol        | 8,500-6,500 BC cal         | wild                          |            | mand I                            |                                |            |

| Table 5. A list of all novel obtained, extracted, and sequenced ancient specimens. |        |              |         |       |         |         |                       |                      |                            |            |                        |                              |              |               |       |  |  |  |      |                                               |
|------------------------------------------------------------------------------------|--------|--------------|---------|-------|---------|---------|-----------------------|----------------------|----------------------------|------------|------------------------|------------------------------|--------------|---------------|-------|--|--|--|------|-----------------------------------------------|
| Extract                                                                            | Cloned | Exter Replic | Source  | Sam # | Spec. # | Country | Location              | Site code            | Site type                  | Context    | Phase                  | Dating                       | Wild/Dom     | Element       | Notes |  |  |  |      |                                               |
| GL854                                                                              |        |              | AT1     | 15    |         | Italy   | Sicily                | Grotta dell'Uzzo     | cave                       | F17        | Late Meso              | 8,500-6,500 BC cal           | wild         | mand p        |       |  |  |  | ANC1 | Haplotype                                     |
| GL1000                                                                             |        |              | AT1     | 49    |         | Italy   | Calabria              | Grotta Madonna       | cave                       | F16        | Meso                   | 7,000-6,500 BC cal           | wild         | mand m3       |       |  |  |  |      |                                               |
| GL882                                                                              |        |              | AT1     | 52    |         | Italy   | Calabria              | Grotta Madonna       | cave                       | tg47       | Early Neo              | 6,500-5,500 BC cal           | wild         | mand 11 snr   |       |  |  |  |      | ANC-Italy                                     |
| GL704                                                                              |        |              | AT1     | 11    |         | Italy   | Sicily                | Grotta dell'Uzzo     | cave                       | F11        | Meso-Neo transition    | 6,500-5,500 BC cal           | wild         | mand p        |       |  |  |  |      | ANC-Cside                                     |
| GL856                                                                              |        |              | AT1     | 16    |         | Italy   | Sicily                | Grotta dell'Uzzo     | cave                       | F13        | Meso-Neo transition    | 6,500-5,500 BC cal           | wild         | mand p        |       |  |  |  |      |                                               |
| GL736                                                                              |        |              | AT1     | 17    |         | Italy   | Sicily                | Grotta dell'Uzzo     | cave                       | F13        | Meso-Neo transition    | 6,500-5,500 BC cal           | wild         | max p         |       |  |  |  |      |                                               |
| GL736                                                                              |        | X            | AT1     | 7     |         | Italy   | Sicily                | Grotta dell'Uzzo     | cave                       | F13        | Meso-Neo transition    | 6,500-5,500 BC cal           | wild         | mand 1        |       |  |  |  |      |                                               |
| GL737                                                                              |        |              | AT1     | 19    |         | Italy   | Sicily                | Grotta dell'Uzzo     | cave                       | F13        | Meso-Neo transition    | 6,500-5,500 BC cal           | wild         | max i         |       |  |  |  |      |                                               |
| GL700                                                                              |        |              | AT1     | 8     |         | Italy   | Sicily                | Grotta dell'Uzzo     | cave                       | F8         | Early Neo              | 5,500-4,500 BC cal           | undetermined | mand i        |       |  |  |  |      |                                               |
| GL702                                                                              |        |              | AT1     | 9     |         | Italy   | Sicily                | Grotta dell'Uzzo     | cave                       | F7         | Early Neo              | 5,500-4,500 BC cal           | undetermined | max p         |       |  |  |  |      |                                               |
| GL734                                                                              |        |              | AT1     | 12    |         | Italy   | Sicily                | Grotta dell'Uzzo     | cave                       | F10        | Early Neo              | 5,500-4,500 BC cal           | undetermined | mand i        |       |  |  |  |      |                                               |
| GL849                                                                              |        | X            | AT1     | 46    |         | Italy   | Calabria              | Grotta Madonna       | cave                       | tg41       | Mid Neo                | 5,500-4,500 BC cal           | undetermined | max 1         |       |  |  |  |      | ANC-Italy                                     |
| GL893                                                                              |        |              | AT1     | 47    |         | Italy   | Calabria              | Grotta Madonna       | cave                       | tg40       | Mid Neo                | 5,500-4,500 BC cal           | undetermined | max P4        |       |  |  |  |      |                                               |
| GL1001                                                                             |        |              | AT1     | 56    |         | Italy   | Calabria              | Grotta Madonna       | cave                       | tg38       | Mid Neo                | 5,500-4,500 BC cal           | undetermined | max C fem     |       |  |  |  |      |                                               |
| GL847                                                                              |        |              | AT1     | 23    |         | Italy   | Latum                 | Marmotta 98          | lake dwelling, waterlogged | 13090 IV   | Early Neo              | c. 5,500 BC cal              | undetermined | mand i        |       |  |  |  |      |                                               |
| GL852                                                                              |        |              | AT1     | 22    |         | Italy   | Latum                 | Grotta dell'Uzzo     | cave                       | F4         | Early Neo              | c. 5,500 BC cal              | undetermined | max m3        |       |  |  |  |      |                                               |
| GL701                                                                              |        |              | AT1     | 8     |         | Italy   | Sicily                | Grotta dell'Uzzo     | cave                       | F14        | Mid Neo                | 4,500-4,000 BC cal           | undetermined | max p2        |       |  |  |  |      |                                               |
| GL680                                                                              |        |              | AT1     | 43    |         | Italy   | Apulia                | Masseria Candellaro  | trenched settlement, dry   | Cll        | Early Neo              | 4,500-4,000 BC cal           | undetermined | low canine fe |       |  |  |  |      |                                               |
| GL998                                                                              |        |              | AT1     | 44    |         | Italy   | Apulia                | Masseria Candellaro  | trenched settlement, dry   | Cll        | Early Neo              | 4,500-4,000 BC cal           | undetermined | lower incisor |       |  |  |  |      |                                               |
| GL999                                                                              |        |              | AT1     | 45    |         | Italy   | Apulia                | Masseria Candellaro  | trenched settlement, dry   | Cll        | Early Neo              | 4,500-4,000 BC cal           | undetermined | max M1/2      |       |  |  |  |      |                                               |
| GL746                                                                              |        |              | CM1/SS  | 1     |         | Italy   | Erna Province, Sicily | Tronia               | refuse deposit from hut    | CS11       | Copper Age             | 3500BC cal                   | domestic?    | radius        |       |  |  |  |      | Serrafellicchio culture. 850m above sea level |
| GL715                                                                              |        |              | CM1/SS  | 4     |         | Italy   | Erna Province, Sicily | Tronia               | refuse deposit from hut    | CS4        | Copper Age             | 3500BC cal                   | domestic?    | humerus       |       |  |  |  |      | Serrafellicchio culture. 850m above sea level |
| GL842                                                                              |        |              | AT1     | 53    |         | Italy   | Calabria              | Grotta Madonna       | cave                       | tg14       | Early Bronze           | c. 2,000 BC cal              | undetermined | max P3        |       |  |  |  |      |                                               |
| GL738                                                                              |        |              | AT1     | 54    |         | Italy   | Calabria              | Grotta Madonna       | cave                       | tg11       | Mid Bronze             | c. 1,500 BC cal              | domestic?    | mand 11       |       |  |  |  |      | ANC-Aside                                     |
| GL739                                                                              |        |              | AT1     | 55    |         | Italy   | Calabria              | Grotta Madonna       | cave                       | tg13       | Mid Bronze             | c. 1,500 BC cal              | domestic?    | max p4        |       |  |  |  |      |                                               |
| GL467                                                                              |        |              | AT1     | 84    |         | Italy   | Apulia                | Torre Mordillo 89    | open, dry                  | E9 ci 2    | Late Bronze            | Late 2nd - early 1st mil. BC | undetermined | upper can fem |       |  |  |  |      | ANC-Aside                                     |
| GL483                                                                              |        |              | AT1     | 85    |         | Italy   | Apulia                | Torre Mordillo 89    | open, dry                  | E9 ell 2   | Late Bronze            | Late 2nd - early 1st mil. BC | undetermined | upper 11      |       |  |  |  |      |                                               |
| GL183                                                                              |        |              | AT1     | 86    |         | Italy   | Apulia                | Torre Mordillo 89    | open, dry                  | E9 ci d 2  | Late Bronze            | Late 2nd - early 1st mil. BC | domestic?    | upper 11      |       |  |  |  |      | ANC-Aside                                     |
| GL184                                                                              |        |              | AT1     | 87    |         | Italy   | Apulia                | Torre Mordillo 89    | open, dry                  | E11 aIV 3l | Late Bronze            | Late 2nd - early 1st mil. BC | domestic?    | lower inc     |       |  |  |  |      | ANC-Aside                                     |
| GL304                                                                              |        |              | AT1     | 88    |         | Italy   | Apulia                | Torre Mordillo       | open, dry                  | E9 ell 2/1 | Late Bronze            | Late 2nd - early 1st mil. BC | undetermined | lower inc     |       |  |  |  |      |                                               |
| GL857                                                                              |        |              | FM1     | 1     |         | Italy   | North Sardinia        | Santu Antine         | stone structure, dry       | 109        | Late Bronze            | c. 1,400-1,200 BC cal        | dom/feral    | P3 sup        |       |  |  |  |      | ANC-Cside                                     |
| GL833                                                                              |        |              | FM1     | 2     |         | Italy   | North Sardinia        | Santu Antine         | stone structure, dry       | 109        | Late Bronze            | c. 1,400-1,200 BC cal        | dom/feral    | I1 sup        |       |  |  |  |      |                                               |
| GL344                                                                              |        |              | FM1     | 4     |         | Italy   | North Sardinia        | Santu Antine         | stone structure, dry       | 109        | Late Bronze            | c. 1,400-1,200 BC cal        | dom/feral    | P sup         |       |  |  |  |      | ANC-Aside                                     |
| GL338                                                                              |        |              | FM1     | 5     |         | Italy   | North Sardinia        | Santu Antine         | stone structure, dry       | 104        | Late Bronze            | c. 1,400-1,200 BC cal        | dom/feral    | I1 sup        |       |  |  |  |      | ANC-Aside                                     |
| GL336                                                                              |        |              | FM1     | 18    |         | Italy   | Central Sardinia      | Arubiu               | stone structure, dry       | B4966      | Late Bronze            | c. 1,400-1,200 BC cal        | dom/feral    | I inf         |       |  |  |  |      | ANC-Aside                                     |
| GL872                                                                              |        |              | AT1     | 24    |         | Italy   | Veneto                | Concordia Saaditaria | open site, dry             | 897        | Late bronze            | 13th-9th cent. BC            | undetermined | max i         |       |  |  |  |      |                                               |
| GL884                                                                              |        |              | AT1     | 25    |         | Italy   | Veneto                | Concordia Saaditaria | open site, dry             | 897        | Late bronze            | 13th-9th cent. BC            | domestic?    | mand i        |       |  |  |  |      | ANC-Cside                                     |
| GL884                                                                              |        |              | AT1     | 26    |         | Italy   | Veneto                | Concordia Saaditaria | open site, dry             | 904        | Late bronze            | 13th-9th cent. BC            | undetermined | mand can f    |       |  |  |  |      |                                               |
| GL337                                                                              |        |              | OF      | 19    |         | Italy   | Central Sardinia      | Arubiu               | stone structure, dry       | B4496      | FinalBronze/Early Iron | c. 1,200-900 BC cal          | dom/feral    | I inf         |       |  |  |  |      |                                               |
| GL892                                                                              |        |              | OF      | 20    |         | Italy   | Central Sardinia      | Arubiu               | stone structure, dry       | B3047      | FinalBronze/Early Iron | c. 1,200-900 BC cal          | dom/feral    | I1 sup        |       |  |  |  |      | ANC-Italy                                     |
| GL895                                                                              |        | X            | OF      | 21    |         | Italy   | Central Sardinia      | Arubiu               | stone structure, dry       | B4495      | FinalBronze/Early Iron | c. 1,200-900 BC cal          | dom/feral    | I inf         |       |  |  |  |      | ANC-Italy                                     |
| GL881                                                                              |        | X            | OF      | 22    |         | Italy   | Central Sardinia      | Arubiu               | stone structure, dry       | B3049      | FinalBronze/Early Iron | c. 1,200-900 BC cal          | dom/feral    | I inf         |       |  |  |  |      | ANC-Italy                                     |
| GL874                                                                              |        |              | FM1     | 10    |         | Italy   | Sardinia              | Sant'Imbenia         | stone structure, dry       | 10220      | dom/feral              | c. 900-600 BC                | dom/feral    | C inf female  |       |  |  |  |      |                                               |
| GL346                                                                              |        |              | FM1     | 12    |         | Italy   | North Sardinia        | Sant'Imbenia         | stone structure, dry       | 19758      | dom/feral              | c. 900-600 BC                | dom/feral    | I inf         |       |  |  |  |      | ANC-Cside                                     |
| GL334                                                                              |        |              | FM1     | 13    |         | Italy   | North Sardinia        | Sant'Imbenia         | stone structure, dry       | 21227      | dom/feral              | c. 900-600 BC                | dom/feral    | C inf female  |       |  |  |  |      | ANC-Aside                                     |
| GL817                                                                              |        |              | FM1     | 15    |         | Italy   | North Sardinia        | Sant'Imbenia         | stone structure, dry       | 21292      | dom/feral              | c. 900-600 BC                | dom/feral    | I1 sup        |       |  |  |  |      |                                               |
| GL811                                                                              |        |              | FM1     | 16    |         | Italy   | North Sardinia        | Sant'Imbenia         | stone structure, dry       | 21292      | dom/feral              | c. 900-600 BC                | dom/feral    | I inf         |       |  |  |  |      |                                               |
| GL329                                                                              |        |              | JG2/CM2 | 77    |         | Italy   | Rome                  | Quirinale            | urban, dry                 |            | 1st cent. AD           | 1st cent. AD                 | domestic?    | lower 1       |       |  |  |  |      | ANC-Aside                                     |
| GL867                                                                              |        |              | JG2/CM2 | 77    |         | Italy   | Rome                  | Quirinale            | urban, dry                 |            | 1st cent. AD           | 1st cent. AD                 | domestic?    | lower 1       |       |  |  |  |      |                                               |
| GL813                                                                              |        |              | JG2/CM2 | 83    |         | Italy   | Rome                  | Quirinale            | urban, dry                 |            | 1st cent. AD           | 1st cent. AD                 | domestic?    | lower M3      |       |  |  |  |      |                                               |
| GL873                                                                              |        |              | JG2/CM2 | 93    |         | Italy   | Rome                  | Arco di Costantino   | urban, dry                 | 93         | 1st cent. AD           | 1st cent. AD                 | domestic?    | lower inc     |       |  |  |  |      | ANC-Aside                                     |
| GL475                                                                              |        |              | JG2/CM2 | 90    |         | Italy   | Rome                  | Arco di Costantino   | urban, dry                 | 65         | 2nd cent. AD           | 2nd cent. AD                 | undetermined | upper can fem |       |  |  |  |      |                                               |
| GL722                                                                              |        | X            | JG2/CM2 | 40    | 2589    | Italy   | Rome                  | Crypta Balbi         | urban, dry                 |            | 7th cent AD            | 7th cent AD                  | undetermined | canine fe     |       |  |  |  |      | ANC-Italy                                     |
| GL706                                                                              |        |              | JG2/CM2 | 34    | 3151    | Italy   | Rome                  | Crypta Balbi         | urban, dry                 |            | 7th cent AD            | 7th cent AD                  | undetermined | mand m2       |       |  |  |  |      | ANC-Cside                                     |
| GL708                                                                              |        |              | JG2/CM2 | 35    | 3991    | Italy   | Rome                  | Crypta Balbi         | urban, dry                 |            | 8th cent AD            | 8th cent AD                  | domestic?    | mand C female |       |  |  |  |      | ANC-Aside                                     |
| GL707                                                                              |        |              | JG2/CM2 | 35    | 3991    | Italy   | Rome                  | Crypta Balbi         | urban, dry                 |            | 8th cent AD            | 8th cent AD                  | wild?        | max m3        |       |  |  |  |      | ANC-Italy                                     |
| GL708                                                                              |        |              | JG2/CM2 | 36    | 6127    | Italy   | Rome                  | Crypta Balbi         | urban, dry                 |            | 8th cent AD            | 8th cent AD                  | wild?        | cuboid        |       |  |  |  |      | ANC-Italy                                     |
| GL709                                                                              |        | X            | JG2/CM2 | 37    | 4158    | Italy   | Rome                  | Crypta Balbi         | urban, dry                 |            | 8th cent AD            | 8th cent AD                  | undetermined | canine fe     |       |  |  |  |      | ANC-Aside                                     |
| GL720                                                                              |        |              | JG2/CM2 | 38    | 4166    | Italy   | Rome                  | Crypta Balbi         | urban, dry                 |            | 8th cent AD            | 8th cent AD                  | undetermined | canine fe     |       |  |  |  |      | ANC-Cside                                     |
| GL723                                                                              |        |              | JG2/CM2 | 59    | 7248    | Italy   | Rome                  | Crypta Balbi         | urban, dry                 |            | 8th cent AD            | 8th cent AD                  | undetermined | canine fe     |       |  |  |  |      | ANC-Aside                                     |
| GL731                                                                              |        |              | JG2/CM2 | 60    | 11804   | Italy   | Rome                  | Crypta Balbi         | urban, dry                 |            | 9th cent AD            | 9th cent AD                  | undetermined | mand C female |       |  |  |  |      | ANC-Aside                                     |
| GL732                                                                              |        |              | JG2/CM2 | 61    | 11803   | Italy   | Rome                  | Crypta Balbi         | urban, dry                 |            | 9th cent AD            | 9th cent AD                  | undetermined | mand C female |       |  |  |  |      | ANC-Aside                                     |
| GL733                                                                              |        |              | JG2/CM2 | 62    | 10583   | Italy   | Rome                  | Crypta Balbi         | urban, dry                 |            | 9th cent AD            | 9th cent AD                  | undetermined | mand C female |       |  |  |  |      | ANC-Aside                                     |
| GL496                                                                              |        |              | JG2/CM2 | 63    | 13793   | Italy   | Rome                  | Crypta Balbi         | urban, dry                 |            | 10th cent AD           | 10th cent AD                 | wild?        | mand C female |       |  |  |  |      | ANC-Italy                                     |
| GL501                                                                              |        |              | JG2/CM2 | 65    | 12382   | Italy   | Rome                  | Crypta Balbi         | urban, dry                 |            | 10th cent AD           | 10th cent AD                 | undetermined | mand C fem    |       |  |  |  |      | ANC-Aside                                     |
| GL325                                                                              |        |              | JG2/CM2 | 66    | 13803   | Italy   | Rome                  | Crypta Balbi         | urban, dry                 |            | 10th cent AD           | 10th cent AD                 | undetermined | mand C fem    |       |  |  |  |      | ANC-Aside                                     |
| GL472                                                                              |        | X            | JG2/CM2 | 67    | 12399   | Italy   | Rome                  | Crypta Balbi         | urban, dry                 |            | 10th cent AD           | 10th cent AD                 | undetermined | lower 1       |       |  |  |  |      | ANC-Aside                                     |
| GL460                                                                              |        |              | JG2/CM2 | 68    | 12386   | Italy   | Rome                  | Crypta Balbi         | urban, dry                 |            | 10th cent AD           | 10th cent AD                 | undetermined | mand i        |       |  |  |  |      | ANC-Aside                                     |
| GL455                                                                              |        |              | JG2/CM2 | 69    | 13816   | Italy   | Rome                  | Crypta Balbi         | urban, dry                 |            | 10th cent AD           | 10th cent AD                 | undetermined | lower 1       |       |  |  |  |      | ANC-Aside                                     |
| GL440                                                                              |        |              | JG2/CM2 | 71    | 13817   | Italy   | Rome                  | Crypta Balbi         | urban, dry                 |            | 10th cent AD           | 10th cent AD                 | undetermined | lower 1       |       |  |  |  |      | ANC-Aside                                     |
| GL452                                                                              |        |              | JG2/CM2 | 73    | 13778   | Italy   | Rome                  | Crypta Balbi         | urban, dry                 |            | 10th cent AD           | 10th cent AD                 | domestic     | lower M3      |       |  |  |  |      | ANC-Aside                                     |
| GL372                                                                              |        |              | CM2     | 94    | 4416    | Italy   | Tuscany               | Cencelle             | open, dry                  |            | 14th-15th cent. AD     | 14th-15th cent. AD           | wild         | mand C male   |       |  |  |  |      | ANC-Italy                                     |
| GL464                                                                              |        |              | CM2     | 95    | 4415    | Italy   | Tuscany               | Cencelle             | open, dry                  |            | 14th-15th cent. AD     | 14th-15th                    |              |               |       |  |  |  |      |                                               |

Table S. A list of all novel obtained, extracted, and sequenced ancient specimens.

| Extract     | Cloned | Exter Replic | Source      | Sam # | Spec. # | Country     | Location                         | Site code               | Site type     | Context              | Period                 | Dating                          | Wild/Dom     | Element             | Notes                             | ANC1             | Haplotype |           |
|-------------|--------|--------------|-------------|-------|---------|-------------|----------------------------------|-------------------------|---------------|----------------------|------------------------|---------------------------------|--------------|---------------------|-----------------------------------|------------------|-----------|-----------|
| GL988       |        | AD           | Romania     | 5     |         | Romania     | Drobeta-Turnu Severin            | Schela Cladovei         | open air      | 0.82-0.87            | Mesolithic             | 7134-6851 BC cal.               | wild?        | tooth fragment      |                                   |                  | ANC-Aside |           |
| GL370       |        | AD           | Romania     | 16    |         | Romania     | Drobeta-Turnu Severin            | Schela Cladovei         | open air      | GE. ~1.00m           | Mesolithic             |                                 | wild?        | tooth fragment      |                                   |                  | ANC-Aside |           |
| GL899       |        | AB           | Romania     | 1     | 103     | Romania     | Teleorman County                 | Măgura                  | open air      | Sondage 22 Comp      | Neolithic              | 6000 BC cultural                |              | M2, M3              | Chris Culture                     |                  |           |           |
| GL900       |        | AB           | Romania     | 2     | 104     | Romania     | Teleorman County                 | Măgura                  | open air      | Sondage 19 Comp      | Neolithic              | 5500 BC                         |              | M1                  | Early Dudesi / Karanovo III       |                  | ANC-Y1-6A |           |
| GL903       |        | AB           | Romania     | 3     | 105     | Romania     | Teleorman County                 | Măgura                  | open air      | Sondage 20 Comp      | Neolithic              | 5500 BC                         |              | Pd4, M1, M2 (+/-)   | Early Dudesi / Karanovo III       |                  | ANC-Y1-6A |           |
| GL904       |        | AB           | Romania     | 4     | 106     | Romania     | Teleorman County                 | Măgura                  | open air      | Sondage 22 Comp      | Neolithic              | 5200 BC                         |              | M1, M2 (+/-)        | Late Dudesi                       |                  |           |           |
| GL905       |        | AB           | Romania     | 5     | 107     | Romania     | Teleorman County                 | Măgura                  | open air      | Sondage 22 Comp      | Neolithic              | 5200 BC                         |              | M1                  | Late Dudesi                       |                  |           |           |
| GL375       |        | AD           | Romania     | 11    |         | Romania     | Iron Gates Canyon                | Veterani cave           | cave          | S.III. ~3.05m        | Neolithic              | 5300 - 5000 BC?                 |              |                     | tooth fragment                    | Starcevo culture |           | ANC-Aside |
| GL687       |        | AB           | Romania     | 3     | 1019    | Romania     | Ialomița County                  | Borduşani 2002          | tell          | US 3646              | Chalcolithic           | 4500-3950 BC cal                | wild         | law fragment        | Gumelnita A2                      |                  |           |           |
| GL521       |        | AB           | Romania     | 1     | 1023    | Romania     | Ialomița County                  | Borduşani               | tell          |                      | Chalcolithic           | 4500-3950 BC                    | wild         | inferior M2         | Gumelnita culture                 |                  | ANC-Y1-6A |           |
| GL522       |        | AB           | Romania     | 2     | 1       | Romania     | Bacău county                     | Poduri                  | tell          | pit 55               | Chalcolithic           | 4500-4250 BC cal                | domestic     | inferior Pm2        | 7-8 months / Cucuteni culture A2  |                  | ANC-Y1-6A |           |
| GL523       |        | AB           | Romania     | 3     | 2       | Romania     | Bacău county                     | Poduri                  | tell          | pit 56               | Chalcolithic           | 4500-4250 BC cal                | domestic     | superior 7          | 9-10 months / Cucuteni culture A2 |                  | ANC-Y1-6A |           |
| GL688       |        | AD           | Romania     | 4     | 23      | Romania     | Bacău county                     | Poduri 2001             | tell          |                      | Chalcolithic           | 4500-4250 BC                    | wild         | law fragment        | Cucuteni culture A2               |                  | ANC-Aside |           |
| GL566       |        | AD           | Romania     | 7     | 5041    | Romania     | Calărași Cnty, Island nr Giurgiu | Căscioarele A           | tell          | level -1.05m         | Chalcolithic           | mid 5th - mid 4th millennium BC | wild         | premolar 4          | Gumelnita culture                 |                  | ANC-Aside |           |
| GL567       |        | AD           | Romania     | 6     | 5151    | Romania     | Calărași Cnty, Island nr Giurgiu | Căscioarele A           | tell          | 1.30 - 1.55m         | Chalcolithic           | mid 5th - mid 4th millennium BC | wild         | incisor             | Gumelnita culture                 |                  | ANC-Aside |           |
| GL568       |        | AD           | Romania     | 7     | 5157    | Romania     | Calărași Cnty, Island nr Giurgiu | Căscioarele A           | tell          | 1.30 - 1.55m         | Chalcolithic           | mid 5th - mid 4th millennium BC | domestic     | premolar 3/4        | Gumelnita culture                 |                  | ANC-Y1-6A |           |
| GL569       |        | AD           | Romania     | 8     | 5058    | Romania     | Calărași Cnty, Island nr Giurgiu | Căscioarele A           | tell          | level -1.05m         | Chalcolithic           | mid 5th - mid 4th millennium BC | wild         | premolar 3/4        | Gumelnita culture                 |                  | ANC-Y1-6A |           |
| GL576       |        | AD           | Romania     | 10    | 5138    | Romania     | Calărași Cnty, Island nr Giurgiu | Căscioarele A           | tell          |                      | Chalcolithic           | mid 5th - mid 4th millennium BC | domestic     | tooth fragment      | Gumelnita culture                 |                  | ANC-Y1-6A |           |
| GL868       |        | AD           | Romania     | 11    | 5142    | Romania     | Calărași Cnty, Island nr Giurgiu | Căscioarele A           | tell          |                      | Chalcolithic           | mid 5th - mid 4th millennium BC | domestic     | tooth fragment      | Gumelnita culture                 |                  | ANC-Y1-6A |           |
| GL575       |        | AD           | Romania     | 12    | 5150    | Romania     | Calărași Cnty, Island nr Giurgiu | Căscioarele A           | tell          |                      | Chalcolithic           | mid 5th - mid 4th millennium BC | wild         | tooth fragment      | Gumelnita culture                 |                  | ANC-Aside |           |
| GL803       |        | AD           | Romania     | 14    | 5159    | Romania     | Calărași Cnty, Island nr Giurgiu | Căscioarele A           | tell          |                      | Chalcolithic           | mid 5th - mid 4th millennium BC | domestic     | tooth fragment      | Gumelnita culture                 |                  | ANC-Y1-6A |           |
| GL834       |        | AD           | Romania     | 15    | 5198    | Romania     | Calărași Cnty, Island nr Giurgiu | Căscioarele A           | tell          |                      | Chalcolithic           | mid 5th - mid 4th millennium BC | wild         | tooth fragment      | Gumelnita culture                 |                  | ANC-Y1-6A |           |
| GL987       |        | AD           | Romania     | 4     | 32167   | Romania     | Calărași Cnty, Island nr Giurgiu | Căscioarele             | tell          |                      | Chalcolithic           | mid 5th - mid 4th millennium BC | undetermined | law fragment        | Gumelnita culture                 |                  | ANC-Y1-6A |           |
| GL563       |        | AD           | Romania     | 1     | 126     | Romania     | Călărași County                  | Vărăști                 | tell          | Boian B, level 3, at | Middle/Late Neo - Eneo | 5th Millennium BC?              | undetermined | premolar 4, left    | Boian & Gumelnita culture         |                  |           |           |
| GL564       |        | AD           | Romania     | 2     | 146     | Romania     | Călărași County                  | Vărăști                 | tell          | level 4, area A      | Middle/Late Neo - Eneo | 5th Millennium BC?              | undetermined | premolar 3/4        | Boian & Gumelnita culture         |                  |           |           |
| GL447       |        | AD           | Romania     | 3     | 155     | Romania     | Călărași County                  | Vărăști                 | tell          | level 4, area B      | Middle/Late Neo - Eneo | 5th Millennium BC?              | undetermined | incisor 1,2         | Boian & Gumelnita culture         |                  | ANC-Aside |           |
| GL565       |        | AD           | Romania     | 4     | 98      | Romania     | Călărași County                  | Vărăști                 | tell          | level 4, area B      | Middle/Late Neo - Eneo | 5th Millennium BC?              | undetermined | premolar 3/4        | Boian & Gumelnita culture         |                  | ANC-Y1-6A |           |
| GL1033      |        | AB           | Romania     | 5     | 599     | Romania     | Constanța County                 | Hârșova                 | tell          | Cernavoda            | Chalcolithic           | 4100-3400 BC                    | undetermined | tooth lower M2      | Culture Cernavoda I culture       |                  |           |           |
| GL689       |        | AB           | Romania     | 9     | 1713    | Romania     | Constanța County                 | Hârșova 2001            | tell          | Gumelnita A2         | Chalcolithic           | 4500-3950 BC                    | wild         | law fragment        | Gumelnita A2 culture              |                  |           |           |
| GL690       |        | AB           | Romania     | 10    | 727     | Romania     | Constanța County                 | Hârșova 1996            | tell          | Gumelnita A2         | Chalcolithic           | 4500-3950 BC                    | wild         | law fragment        | Gumelnita A2 culture              |                  |           |           |
| GL691       |        | AB           | Romania     | 13    | 1903    | Romania     | Constanța County                 | Hârșova 2002            | tell          | Gumelnita A2         | Chalcolithic           | 4500-3950 BC                    | undetermined | law fragment        | Gumelnita A2 culture              |                  |           |           |
| GL692       |        | AB           | Romania     | 17    | 206     | Romania     | Giurgiu County                   | Bucșani 2001            | tell          | Gumelnita B1         | Chalcolithic           | 4300-3900 BC                    | domestic     | law fragment        | Gumelnita B1 culture              |                  |           |           |
| GL693       |        | AB           | Romania     | 18    | 578     | Romania     | Giurgiu County                   | Bucșani 2004            | tell          | Gumelnita B1         | Chalcolithic           | 4300-3900 BC                    | wild         | law fragment        | Gumelnita B1 culture              |                  |           |           |
| GL1031      |        | VD           | Romania     | 3     | 13      | Romania     | Ilfou County                     | Popești                 | open air      | pit                  | Bronze Age             | 3000-1600 BC?                   | domestic     | Mandibula right     |                                   |                  | ANC-Aside |           |
| GL1032      |        | VD           | Romania     | 4     | 14      | Romania     | Ilfou County                     | Popești                 | open air      | pit                  | Bronze Age             | 3000-1600 BC?                   | domestic     | Mandibula right     |                                   |                  | ANC-Aside |           |
| GL1030      |        | AB           | Romania     | 2     | 29      | Romania     | Buzău County                     | Cărnănești 2003, Cpl. 4 | open air      | pit 4                | Bronze Age             | 3000-1600 BC                    | domestic     | Mandibula right     | Monteoru culture                  |                  | ANC-Aside |           |
| GL906       |        | VD           | Romania     | 6     | 1       | Romania     | Ialomița                         | Bucu 2004               | open air      | Sondage LXI and      | Hallstatt              | 1000-800 BC                     |              | Pd3, Pd4            |                                   |                  | ANC-Aside |           |
| GL150       |        | VD           | Romania     | 2     | 15      | Romania     | Ilfou County                     | Popești                 | open air      | pit                  | Hallstatt              | 10th century BC                 | domestic     | mandible            |                                   |                  | ANC-Aside |           |
| GL1034      |        | VD           | Romania     | 6     | 16      | Romania     | Ilfou County                     | Popești                 | open air      | pit                  | Hallstatt C            | 900 - 150 BC?                   | domestic     | Mandibula right     |                                   |                  | ANC-Aside |           |
| GL1035      |        | VD           | Romania     | 7     | 17      | Romania     | Ilfou County                     | Popești                 | open air      | pit                  | La Tene                | 800 - 150 BC?                   | domestic     | Mandibula right     |                                   |                  | ANC-Aside |           |
| GL1036      |        | AB           | Romania     | 13    | 134     | Romania     | Constanța County                 | Durostorum              | open air      | pit 33               | Epoque Roman           | 300-400 AD                      | domestic     | Mandibula left      |                                   |                  | ANC-Aside |           |
| GL1037      |        | AB           | Romania     | 14    | 135     | Romania     | Constanța County                 | Durostorum              | open air      | pit 33               | Epoque Roman           | 300-400 AD                      | domestic     | Mandibula right     |                                   |                  | ANC-Aside |           |
| Switzerland |        |              |             |       |         |             |                                  |                         |               |                      |                        |                                 |              |                     |                                   |                  |           |           |
| GL362       |        | JS           | Switzerland | 1     |         | Switzerland | Zürich-Mozartstrasse             | MZ                      | lake dwelling | 5876                 | Late neolithic         | 4u (3688-3661 BC cal)           | undetermined | mand                | Pfyn culture                      |                  |           |           |
| GL363       |        | JS           | Switzerland | 6     |         | Switzerland | Zürich-Mozartstrasse             | MZ                      | lake dwelling | 4936                 | Late neolithic         | 4c (3613-3600 BC cal)           | undetermined | mand                | Pfyn culture                      |                  |           |           |
| GL828       |        | JS           | Switzerland | 13    |         | Switzerland | Zürich-Mozartstrasse             | MZ                      | lake dwelling | 4592                 | Late neolithic         | 4c (3613-3600 BC cal)           | undetermined | mand                | Pfyn culture                      |                  |           |           |
| GL5         |        | JS           | Switzerland | 8     |         | Switzerland | Zürich-Mozartstrasse             | MZ                      | lake dwelling | 5431                 | Late neolithic         | 3u (3126-3098 BC cal)           | undetermined | max                 | Horgen culture                    |                  |           |           |
| GL870       |        | JS           | Switzerland | 16    |         | Switzerland | Zürich-Mozartstrasse             | MZ                      | lake dwelling | 1931                 | Late neolithic         | 3a (3126-3098 BC cal)           | undetermined | max incis           | Horgen culture                    |                  |           |           |
| GL3a        |        | JS           | Switzerland | 26    |         | Switzerland | Zürich-Seefeld                   | SEE                     | lake dwelling | 1594                 | Late neolithic         | E (2718-2710 BC cal)            | undetermined | mand inc            | Corded Ware culture               |                  |           |           |
| GL12        |        | JS           | Switzerland | 27    |         | Switzerland | Zürich-Seefeld                   | SEE                     | lake dwelling | 724                  | Late neolithic         | E (2718-2710 BC cal)            | undetermined | mand can fe         | Corded Ware culture               |                  |           |           |
| GL13        |        | JS           | Switzerland | 28    |         | Switzerland | Zürich-Seefeld                   | SEE                     | lake dwelling | 674                  | Late neolithic         | E (2718-2710 BC cal)            | undetermined | max inc             | Corded Ware culture               |                  |           |           |
| GL14        |        | JS           | Switzerland | 29    |         | Switzerland | Zürich-Seefeld                   | SEE                     | lake dwelling | 7                    | Late neolithic         | E (2718-2710 BC cal)            | undetermined | mand m3             | Corded Ware culture               |                  |           |           |
| GL6         |        | JS           | Switzerland | 31    |         | Switzerland | Birsamten-Basissgrotte           | BB                      | Abri          |                      | late mesolithic        | OS (-6000-5500 BC cal)          | undetermined | mand                | anc                               |                  |           |           |
| GL7         |        | JS           | Switzerland | 32    |         | Switzerland | Birsamten-Basissgrotte           | BB                      | Abri          |                      | late mesolithic        | OS (-6000-5500 BC cal)          | undetermined | mand m3             | anc                               |                  |           |           |
| GL8         |        | JS           | Switzerland | 33    |         | Switzerland | Birsamten-Basissgrotte           | BB                      | Abri          |                      | late mesolithic        | OS (-6000-5500 BC cal)          | undetermined | mand can f          | anc                               |                  |           |           |
| GL7         |        | JS           | Switzerland | 34    |         | Switzerland | Birsamten-Basissgrotte           | BB                      | Abri          |                      | late mesolithic        | OS (-6000-5500 BC cal)          | undetermined | mand m3             | anc                               |                  |           |           |
| GL9         |        | JS           | Switzerland | 35    |         | Switzerland | Birsamten-Basissgrotte           | BB                      | Abri          |                      | mesolithic             | E                               | undetermined | mand can f          | anc                               |                  |           |           |
| GL10        |        | JS           | Switzerland | 36    |         | Switzerland | Birsamten-Basissgrotte           | BB                      | Abri          |                      | mesolithic             | N4                              | undetermined | mand can fe         | anc                               |                  |           |           |
| GL489       |        | JS           | Switzerland | 38    |         | Switzerland | Zürich-Mozartstrasse             | MZ                      | lake dwelling |                      | Bronze Age             | 1u (19th century BC cal)        | undetermined | max m3              |                                   |                  |           |           |
| GL466       |        | JS           | Switzerland | 39    |         | Switzerland | Zürich-Mozartstrasse             | MZ                      | lake dwelling | 1473                 | Bronze Age             | 1o (18th century BC cal)        | undetermined | ?                   |                                   |                  |           |           |
| GL435       |        | JS           | Switzerland | 40    |         | Switzerland | Zürich-Mozartstrasse             | MZ                      | lake dwelling | 6859                 | Bronze Age             | 1o (18th century BC cal)        | undetermined | ?                   |                                   |                  |           |           |
| GL2         |        | JS           | Switzerland | 39    |         | Switzerland | Arbon-Bleiche 3                  | ARBON                   | lake dwelling | 4199                 | Late neolithic         | 3384-3370 BC cal)               | domestic?    | mand can f          | early Horgen culture              |                  |           |           |
| GL20        |        | JS           | Switzerland | 40    |         | Switzerland | Arbon-Bleiche 3                  | ARBON                   | lake dwelling | 5086                 | Late neolithic         | 3384-3370 BC cal)               | domestic?    | mand can f          | early Horgen culture              |                  |           |           |
| GL21        |        | JS           | Switzerland | 41    |         | Switzerland | Arbon-Bleiche 3                  | ARBON                   | lake dwelling | 8978                 | Late neolithic         | 3384-3370 BC cal)               | domestic?    | mand can f          | early Horgen culture              |                  |           |           |
| GL22        |        | JS           | Switzerland | 42    |         | Switzerland | Arbon-Bleiche 3                  | ARBON                   | lake dwelling | 7949                 | Late neolithic         | 3384-3370 BC cal)               | domestic?    | mand can f          | early Horgen culture              |                  |           |           |
| GL18        |        | JS           | Switzerland | 43    |         | Switzerland | Arbon-Bleiche 3                  | ARBON                   | lake dwelling | 8603                 | Late neolithic         | 3384-3370 BC cal)               | domestic?    | mand can f          | early Horgen culture              |                  |           |           |
| GL23        |        | JS           | Switzerland | 44    |         | Switzerland | Arbon-Bleiche 3                  | ARBON                   | lake dwelling | 7148                 | Late neolithic         | 3384-3370 BC cal)               | domestic?    | mand can f          | early Horgen culture              |                  |           |           |
| GL24        |        | JS           | Switzerland | 45    |         | Switzerland | Arbon-Bleiche 3                  | ARBON                   | lake dwelling | 2257                 | Late neolithic         | 3384-3370 BC cal)               | domestic?    | mand can f          | early Horgen culture              |                  |           |           |
| GL25        |        | JS           | Switzerland | 46    |         | Switzerland | Arbon-Bleiche 3                  | ARBON                   | lake dwelling | 8729                 | Late neolithic         | 3384-3370 BC cal)               | wild?        | max incis           | early Horgen culture              |                  |           |           |
| GL26        |        | JS           | Switzerland | 47    |         | Switzerland | Arbon-Bleiche 3                  | ARBON                   | lake dwelling | 7968                 | Late neolithic         | 3384-3370 BC cal)               | wild?        | max incis           | early Horgen culture              |                  |           |           |
| GL27        |        | JS           | Switzerland | 48    |         | Switzerland | Arbon-Bleiche 3                  | ARBON                   | lake dwelling | 7                    | Late neolithic         | 3384-3370 BC cal)               | wild?        | max incis           | early Horgen culture              |                  |           |           |
| GL28        |        | JS           | Switzerland | 49    |         | Switzerland | Arbon-Bleiche 3                  | ARBON                   | lake dwelling | 9974                 | Late neolithic         | 3384-3370 BC cal)               | wild?        | max incis           | early Horgen culture              |                  |           |           |
| GL16        |        | JS           | Switzerland | 50    |         | Switzerland | Arbon-Bleiche 3                  | ARBON                   | lake dwelling | 10446                | Late neolithic         | 3384-3370 BC cal)               | wild?        | max incis           | early Horgen culture              |                  |           |           |
| GL17        |        | JS           | Switzerland | 51    |         | Switzerland | Arbon-Bleiche 3                  | ARBON                   | lake dwelling | 5527                 | Late neolithic         | 3384-3370 BC cal)               | wild?        | max m1/2            | early Horgen culture              |                  |           |           |
| GL15        |        | JS           | Switzerland | 52    |         | Switzerland | Arbon-Bleiche 3                  | ARBON                   | lake dwelling | 5777                 | Late neolithic         | 3384-3370 BC cal)               | wild?        | max m3              | early Horgen culture              |                  |           |           |
| GL510       |        | JS           | Switzerland | 1     | C08988  | Switzerland | Augusta Raurica                  | Kastelen                | roman town    |                      | Roman                  | 0-50 AD                         | domestic     | Incisor (deciduous) | </                                |                  |           |           |

| Table 5. A list of all novel obtained, extracted, and sequenced ancient specimens. |        |              |        |             |                 |             |                              |                         |                         |                        |                           |                                         |              |                     |                                                     |           |           |
|------------------------------------------------------------------------------------|--------|--------------|--------|-------------|-----------------|-------------|------------------------------|-------------------------|-------------------------|------------------------|---------------------------|-----------------------------------------|--------------|---------------------|-----------------------------------------------------|-----------|-----------|
| Accession                                                                          | Cloned | Exter Replic | Source | Sample #    | Spec. #         | Country     | Location                     | Site code               | Site type               | Context                | Phase                     | Dating                                  | Wild/Dom     | Element             | Notes                                               | ANC1      | Haplotype |
| ASPIA2                                                                             |        |              | JS     | 4           |                 | Switzerland | Untervaz-Haselboden          | 2001                    | settlement              | cultural layer         | Neolithic                 | 3600-3150BC C14 1sigma cal              | wild?        | domestic            |                                                     |           |           |
| ASPIA7                                                                             |        |              | JS     | 5           |                 | Switzerland | Untervaz-Haselboden          | 2001                    | settlement              | cultural layer         | Neolithic                 | 2810+/-50BC                             | wild?        | domestic            | early Horgen culture                                |           |           |
| GL1021                                                                             |        |              | JS     | 5           |                 | Switzerland | Cazis-Petrushügel            | 1981                    | settlement              | cultural layer         | Neolithic                 | 29th/28th century BC - typological/cult | wild?        | M3 max              | late Horgen culture                                 |           |           |
| ASPIA7                                                                             |        |              | JS     | 7           |                 | Switzerland | Cazis-Petrushügel            | 1981                    | settlement              | cultural layer         | Neolithic                 | 29th/28th century BC                    | wild?        | Humerus             | late Horgen culture                                 |           |           |
| GL1022                                                                             |        |              | JS     | 8           |                 | Switzerland | Cazis-Petrushügel            | 1981                    | settlement              | cultural layer         | Neolithic                 | 29th/28th century BC                    | domestic     | C max female        | late Horgen culture                                 |           | ANC-Cside |
| ASPIA9                                                                             |        |              | JS     | 9           |                 | Switzerland | Cazis-Petrushügel            | 1981                    | settlement              | cultural layer         | Neolithic                 | 29th/28th century BC                    | domestic     | Occipitale, Proc. S | late Horgen culture                                 |           | ANC-Aside |
| GL1023                                                                             |        | X            | JS     | 10          |                 | Switzerland | Cazis-Petrushügel            | 1981                    | settlement              | cultural layer         | Neolithic                 | 29th/28th century BC                    | wild?        | Radius              | late Horgen culture                                 |           | ANC-Aside |
| GL1024                                                                             |        | X            | JS     | 11          |                 | Switzerland | Untervaz-Haselbodenschenke   | 2003                    | settlement              | cultural layer         | Neolithic                 | 27th - 25th century BC                  | wild         | Humerus             | Corded Ware culture                                 |           | ANC-Cside |
| GL1035                                                                             |        | X            | JS     | 12          |                 | Switzerland | Untervaz-Haselbodenschenke   | 2003                    | settlement              | cultural layer         | Neolithic                 | 27th - 25th century BC                  | domestic     | Tibia               | late Horgen culture                                 |           | ANC-Aside |
| GL1026                                                                             |        |              | JS     | 14          |                 | Switzerland | Untervaz-Haselbodenschenke   | 2003                    | settlement              | cultural layer         | Neolithic                 | 27th - 25th century BC                  | wild         | Astragalus          | Corded Ware culture                                 |           | ANC-Cside |
| ASPIA15                                                                            |        |              | JS     | 15          |                 | Switzerland | Untervaz-Haselbodenschenke   | 2003                    | settlement              | cultural layer         | Neolithic                 | 38th - 36th century BC                  | wild         | Cuboid              | PIVn culture                                        |           | ANC-Cside |
| Ukraine                                                                            |        |              |        |             |                 |             |                              |                         |                         |                        |                           |                                         |              |                     |                                                     |           |           |
| GL128                                                                              |        | X            | NB     | 1           |                 | Ukraine     | South Crimea                 | Span-Koba               | open, dry               | 1/2/10                 | Mesolithic                | 9th-8th mil BC cal                      | wild?        | lower ilk incis     | chrt. layer-horizon-quadrant (was listed as 1/2/10) |           | ANC-Y2-5A |
| GL535                                                                              |        |              | NB     | 4           |                 | Ukraine     | South Crimea                 | Shan-Koba               | open, dry               | 1                      | Early Neo                 | 7th mil BC cal                          | undetermined | lower M1/2          | chrt. layer                                         |           |           |
| GL536/808                                                                          |        |              | NB     | 5           |                 | Ukraine     | South Crimea                 | Shan-Koba               | open, dry               | 1                      | Early Neo                 | 7th mil BC cal                          | wild?        | lower M1/2          | chrt. layer                                         |           | ANC-Y2-5A |
| GL129                                                                              |        |              | NB     | 6           |                 | Ukraine     | South Crimea                 | Fatma Koba              | open, dry               | 3                      | Enolithic                 | ?                                       | undetermined | lower M1/2          | chrt. layer                                         |           |           |
| WEST / NORTH EUROPE                                                                |        |              |        |             |                 |             |                              |                         |                         |                        |                           |                                         |              |                     |                                                     |           |           |
| Belgium                                                                            |        |              |        |             |                 |             |                              |                         |                         |                        |                           |                                         |              |                     |                                                     |           |           |
| GL158                                                                              |        | SVP          |        |             |                 | Belgium     | Falaen, Wallonia             | Montaijele              | Castellum               | MO 8006                | Roman                     | Late 2nd - 5th Century AD               | domestic     | isolated teeth      |                                                     |           |           |
| GL314                                                                              |        |              | X      | AE          | 4000N           | Belgium     | Flanders, nr Coostende       | Oudenburg               | Castellum               | 4000N                  | Late Roman/Early Medieval | no precise dates                        | domestic     | canine              |                                                     |           | ANC-Aside |
| GL215                                                                              |        |              | AE     | 2000D       |                 | Belgium     | Flanders, nr Coostende       | Oudenburg               | Castellum               | 2000D                  | Late Roman/Early Medieval | no precise dates                        | domestic     | molar               |                                                     |           | ANC-Aside |
| Denmark                                                                            |        |              |        |             |                 |             |                              |                         |                         |                        |                           |                                         |              |                     |                                                     |           |           |
| GL152                                                                              |        |              | KA-S   | 3           | KS35/27-37      | Denmark     | NW Zealand                   | Kongemosen              | open                    | KS35/27-37             | mid meso                  | 6400-5400 BC                            | wild         | lower I             |                                                     |           |           |
| GL502                                                                              |        |              | KA-S   | 1           | ZMK 2/1918      | Denmark     | S. Zealand                   | Svaerdborg I-1917       | lake edge, now bog      | ZMK 2/1918             | early meso                | 7200-6800 BC                            | wild         | three incisors      |                                                     |           |           |
| GL309                                                                              |        |              | KA-S   | 2           | ZMK 37/1982     | Denmark     | NE Zealand                   | Bløksbjerg, Klampenborg | open                    | ZMK 37/1982            | late meso (early part)    | 5400-4500 BC                            | wild         | three incisors      |                                                     |           |           |
| GL429                                                                              |        |              | KA-S   | 3           | ZMK 11/1915     | Denmark     | NE Zealand                   | Bløksbjerg, Klampenborg | open                    | ZMK 11/1915            | late meso (late part)     | 5400-4500 BC                            | wild         | three incisors      |                                                     |           |           |
| GL429                                                                              |        |              | KA-S   | 4           | ZMK 119/1971    | Denmark     | E. Jutland                   | Flynderhøge             | open                    | ZMK 119/1971           | late meso (late part)     | 4500-3900 BC                            | wild         | three incisors      |                                                     |           | ANC-Cside |
| GL468                                                                              |        |              | KA-S   | 5           | ZMK 17/1935     | Denmark     | Als                          | Bundso                  | causewayed camp, open   | ZMK 17/1935            | mid neo A phase III       | 2800-2600 BC                            | domestic     | three incisors      |                                                     |           |           |
| GL486                                                                              |        |              | KA-S   | 6           | ZMK 13/1906     | Denmark     | Langeland                    | Troldebjerg             | causewayed camp, open   | ZMK 13/1906            | mid neo A phase III       | 3200-3000 BC                            | domestic     | three incisors      |                                                     |           |           |
| KA-S                                                                               |        |              | 7      | ZMK 37/1909 | Denmark         |             | Joidtofte                    | settlement, open        | ZMK 37/1909             | late bronze age        |                           | 1900-500 BC                             | domestic     | three canines       |                                                     |           |           |
| GL458                                                                              |        |              | KA-S   | 8           | ZMK 14/1899     | Denmark     | Lolland                      | Vejleby                 | settlement, open        | ZMK 14/1899            | Roman iron age            | AD 0-400                                | domestic     | three incisors      |                                                     |           |           |
| GL306                                                                              |        |              | KA-S   | 9           | ZMK 25/1934     | Denmark     | central Zealand              | Trelleborg              | Viking fortress, open   | ZMK 25/1934            | early medieval            | c. AD 1000                              | domestic     |                     |                                                     |           | ANC-Aside |
| GL907                                                                              |        |              | KA-S   | 1           | Z.M.K. 119/1971 | Denmark     | E. Jutland                   | Flynderhøge             | open                    | Z.M.K. 119/1971        | late mesolithic           | 4500-3900 BC                            | wild         | tooth fragment      |                                                     |           | ANC-Cside |
| GL908                                                                              |        |              | KA-S   | 2           | Z.M.K. 119/1971 | Denmark     | E. Jutland                   | Flynderhøge             | open                    | Z.M.K. 119/1971        | late mesolithic           | 4500-3900 BC                            | wild         | tooth fragment      |                                                     |           |           |
| GL909                                                                              |        |              | KA-S   | 4           | Z.M.K. 13/1906  | Denmark     | Langeland                    | Troldebjerg             | causewayed camp, open   | Z.M.K. 13/1906         | middle neolithic          | 3200-3000 BC                            | domestic     | tooth fragment      |                                                     |           |           |
| GL910                                                                              |        |              | KA-S   | 5           | Z.M.K. 13/1906  | Denmark     | Langeland                    | Troldebjerg             | causewayed camp, open   | Z.M.K. 13/1906         | middle neolithic          | 3200-3000 BC                            | domestic     | tooth fragment      |                                                     |           |           |
| England                                                                            |        |              |        |             |                 |             |                              |                         |                         |                        |                           |                                         |              |                     |                                                     |           |           |
| A211                                                                               |        |              | AC     | P1          | CPC-98-1112     | England     | Derbyshire                   | Carsington Pasture Cave | Cave                    | surface of 2nd chamber |                           |                                         |              |                     | left pelvis                                         |           |           |
| A212                                                                               |        |              | AC     | P2          | CPC-98-2218     | England     | Derbyshire                   | Carsington Pasture Cave | Cave                    | below 2nd chamber      | Mesolithic                | 4393 ± 41 cal BC                        | wild         | right mandible      |                                                     |           | ANC-Cside |
| A213                                                                               |        |              | AC     | P3          | CPC-98-2330     | England     | Derbyshire                   | Carsington Pasture Cave | Cave                    | below 3rd chamber      | Mesolithic                | 6673 ± 61 cal BC                        | wild         | right tibia         |                                                     |           | ANC-Aside |
| A214                                                                               |        |              | AC     | P4          | CPC-98-1109     | England     | Derbyshire                   | Carsington Pasture Cave | Cave                    | surface of 2nd chal    | Late Bronze Age           | 1130 ± 63 cal BC                        | domestic     | left humerus        |                                                     |           | ANC-Aside |
| A215                                                                               |        |              | AC     | P5          | CPC-98-2280     | England     | Derbyshire                   | Carsington Pasture Cave | Cave                    | surface of 3rd chal    | Late Bronze Age           | 1158 ± 60 cal BC                        | domestic     | left radius         |                                                     |           | ANC-Aside |
| A216                                                                               |        |              | AC     | P6          | CPC-98-2325     | England     | Derbyshire                   | Carsington Pasture Cave | Cave                    | below 3rd chamber      | Early Neolithic           | 3457 ± 58 cal BC                        | domestic     | right scapula       |                                                     |           | ANC-Aside |
| A217                                                                               |        |              | AC     | P7          | CPC-88-7        | England     | Derbyshire                   | Carsington Pasture Cave | Cave                    | below 2nd chamber      | Late Neolithic            | 2327 ± 82 cal BC                        | domestic     | atlas               |                                                     |           | ANC-Aside |
| GL524                                                                              |        |              | UA     | 11          |                 | England     | Wiltshire                    | Durrington Walls 04     | enclosure, dry          | 019 (3316)             | Late Neolithic            | 2800-2400 BC cal                        | domestic     | mand frag M3        |                                                     |           | ANC-Aside |
| GL525                                                                              |        |              | UA     | 12          |                 | England     | Wiltshire                    | Durrington Walls 04     | enclosure, dry          | 019 (1463)             | Late Neolithic            | 2800-2400 BC cal                        | domestic     | metatarsal I        |                                                     |           | ANC-Aside |
| GL526                                                                              |        |              | UA     | 16          |                 | England     | Wiltshire                    | Durrington Walls 04     | enclosure, dry          | 019 (1470)             | Late Neolithic            | 2800-2400 BC cal                        | domestic     | upper II            |                                                     |           | ANC-Aside |
| GL527                                                                              |        |              | AH     | 1           |                 | England     | Gloucestershire              | Cheshworth Roman villa  | villa, open, dry        | 12                     | Roman                     | 1st-5th cent AD                         | domestic?    | astragalus          |                                                     |           | ANC-Aside |
| GL530                                                                              |        |              | UA     | 25          |                 | England     | York                         | Coppergate              | urban, dry              | 1986.9                 | Roman                     | 1st-5th cent AD                         | domestic?    | tooth fragment      |                                                     |           | ANC-Aside |
| GL531                                                                              |        |              | UA     | 27          |                 | England     | York                         | Coppergate              | urban, dry              | 1986.9                 | Roman                     | 1st-5th cent AD                         | domestic?    | tooth fragment      |                                                     |           | ANC-Aside |
| GL532                                                                              |        |              | UA     | 29          | AB3             | England     | York                         | Swinegate               | urban, dry              | 4014                   | Roman                     | 1st-5th cent AD                         | domestic?    | tooth fragment      |                                                     |           | ANC-Aside |
| GL533                                                                              |        |              | UA     | 31          | AB6             | England     | York                         | Swinegate               | urban, dry              | 4086                   | Roman                     | 1st-5th cent AD                         | domestic?    | tooth fragment      |                                                     |           | ANC-Aside |
| GL327                                                                              |        |              | UA     | 5           |                 | England     | York                         | Fishergate              | urban                   | 1986.9                 | Roman?                    | 1st-5th cent AD                         | domestic?    | tooth fragment      |                                                     |           | ANC-Aside |
| GL157                                                                              |        |              | UA     | 6           |                 | England     | York                         | Fishergate              | urban                   | 1986.9                 | Roman?                    | 1st-5th cent AD                         | domestic?    | tooth fragment      |                                                     |           | ANC-Aside |
| GL528                                                                              |        |              | AH     | 19          | 24780           | England     | Shropshire                   | Wroxeter                | urban, dry              | D100_36L               | 6th-7th cent AD           | 6th-7th cent AD                         | wild         | 3rd metatarsal      |                                                     |           | ANC-Cside |
| GL825                                                                              |        |              | AH     | 21          | 52830           | England     | Shropshire                   | Wroxeter                | urban, dry              | C2774_20A              | 6th-7th cent AD           | 6th-7th cent AD                         | wild         | 3rd metatarsal      |                                                     |           | ANC-Aside |
| GL529                                                                              |        |              | AH     | 21          | 52883           | England     | Shropshire                   | Wroxeter                | urban, dry              | C78-1A 30C             | 6th-7th cent AD           | 6th-7th cent AD                         | wild         | 3rd metatarsal      |                                                     |           | ANC-Aside |
| GL809                                                                              |        |              | KS     |             |                 | England     | North Cave, East Yorkshire   | Southings Lane          |                         |                        | bronze -medieval          |                                         | wild         | law fragment        |                                                     |           |           |
| GL810                                                                              |        |              | KS     |             |                 | England     | North Cave, East Yorkshire   | Southings Lane          |                         |                        | bronze -medieval          |                                         | wild?        | law fragment        |                                                     |           | ANC-Aside |
| France                                                                             |        |              |        |             |                 |             |                              |                         |                         |                        |                           |                                         |              |                     |                                                     |           |           |
| GL451                                                                              |        |              | JDV    |             | E137 15         | France      | Middle Seine Valley (Bassée) | Noven - Sur Seine       | River turbarry deposits | ensem. 2 XVI (9)       | Middle Mesolithic         | 9th millennium cal BC                   | wild         |                     |                                                     |           |           |
| GL301                                                                              |        |              | JDV    |             | E147 17         | France      | Middle Seine Valley (Bassée) | Noven - Sur Seine       | River turbarry deposits | ensem. 2 XVI (9)       | Middle Mesolithic         | 9th millennium cal BC                   | wild         |                     |                                                     |           |           |
| GL431                                                                              |        |              | JDV    |             | K236 28         | France      | Middle Seine Valley (Bassée) | Noven - Sur Seine       | River turbarry deposits | Bone 90168             | Middle Mesolithic?        | 9th millennium cal BC                   | wild         |                     |                                                     |           | ANC-Cside |
| GL846                                                                              |        | X            | AT2    |             | 14              | France      | Paris city                   | Bercy                   | River turbarry deposits | GSMXV19 C2 N5          | Chassen culture           | early 4th Mil BC                        | domestic     | mandible            |                                                     |           | ANC-Y1-6A |
| GL859                                                                              |        |              | AT2    |             | 19              | France      | Paris city                   | Bercy                   | River turbarry deposits | GS LXIX 18 21a         | Chassen culture           | early 4th Mil BC                        | domestic     | mandible            |                                                     |           | ANC-Aside |
| GL859                                                                              |        |              | AT2    |             | 20              | France      | Paris city                   | Bercy                   | River turbarry deposits | GS LXIX 03 C21         | Chassen culture           | early 4th Mil BC                        | domestic     | mandible            |                                                     |           | ANC-Aside |
| GL569                                                                              |        |              | AT2    |             | 26              | France      | Paris city                   | Bercy                   | River turbarry deposits | GSMXV 16 C21           | Chassen culture           | early 4th Mil BC                        | domestic     | mandible            |                                                     |           | ANC-Aside |
| GL570                                                                              |        |              | AT2    |             | 33              | France      | Paris city                   | Bercy                   | River turbarry deposits | GS LXVI 03 C21         | Chassen culture           | early 4th Mil BC                        | domestic     | mandible            |                                                     |           | ANC-Aside |
| GL571                                                                              |        |              | AT2    |             | 36              | France      | Paris city                   | Bercy                   | River turbarry deposits | GS LXIX 24 C21         | Chassen culture           | early 4th Mil BC                        | domestic     | mandible            |                                                     |           | ANC-Aside |
| GL450                                                                              |        |              | AT2    |             | 39              | France      | Paris city                   | Bercy                   | River turbarry deposits | GSKXV 03 C21           | Chassen culture           | early 4th Mil BC                        | domestic     | mandible            |                                                     |           | ANC-Aside |
| GL572                                                                              |        |              | AT2    |             | 40              | France      | Paris city                   | Bercy                   | River turbarry deposits | GSKXV 25 C21           | Chassen culture           | early 4th Mil BC                        | domestic     | mandible            |                                                     |           | ANC-Aside |
| GL824                                                                              |        |              | AT2    |             | 42              | France      | Paris city                   | Bercy                   | River turbarry deposits | GS LXII 09 C21         | Chassen culture           | early 4th Mil BC                        | domestic     | mandible            |                                                     |           | ANC-Aside |
| AT2                                                                                |        |              | 43     |             | France          | Paris city  | Bercy                        | River turbarry deposits | GSMXV 22 C21            | Chassen culture        | early 4th Mil BC          | domestic                                | mandible     |                     |                                                     | ANC-Aside |           |
| GL573                                                                              |        |              | AT2    |             | 44              | France      | Paris city                   | Bercy                   | River turbarry deposits | GSMXVI 12 C2N2         | Chassen culture           | early 4th Mil BC                        | domestic     | mandible            |                                                     |           | ANC-Aside |
| GL898                                                                              |        |              | AT2    |             | 49              | France      | Paris city                   | Bercy                   | River turbarry deposits | GSKXIII 05 C21         | Chassen culture           | early 4th Mil BC                        | domestic     | mandible            |                                                     |           | ANC-Aside |
| GL831                                                                              |        |              | AT2    |             | 50              | France      | Paris city                   | Bercy                   | River turbarry deposits | GSKXIV 14 C21          | Chassen culture           | early 4th Mil BC                        | wild?        | mandible            |                                                     |           | ANC-Aside |
| GL816                                                                              |        |              | AT2    |             | 51              | France      | Paris city                   | Bercy                   | River turbarry deposits | GSMXV 07 C21           | Chassen culture           | early 4th Mil BC                        | wild         | mandible            |                                                     |           | ANC-Aside |
| GL874                                                                              |        |              | AT2    |             | 53              | France      | Paris city                   | Bercy                   | River turbarry deposits | GS LXII 20 C21b        | Chassen culture           | early 4th Mil BC                        | domestic     | mandible            |                                                     |           | ANC-Aside |
| GL802                                                                              |        |              | AT2    |             | 58              | France      | Paris city                   | Bercy                   | River turbarry deposits | GS LXV 17 C21          | Chassen culture           | early 4th Mil BC                        | wild         | mandible            |                                                     |           | ANC-Aside |

| Table 5. A list of all novel obtained, extracted, and sequenced ancient specimens. |        |              |           |        |                |             |                             |                           |                        |                  |                         |                               |               |                     |                     |      |           |
|------------------------------------------------------------------------------------|--------|--------------|-----------|--------|----------------|-------------|-----------------------------|---------------------------|------------------------|------------------|-------------------------|-------------------------------|---------------|---------------------|---------------------|------|-----------|
| Extract                                                                            | Cloned | Exter Replic | Source    | Samp # | Spec. #        | Country     | Location                    | Site code                 | Site type              | Context          | Phase                   | Dating                        | Wild/Dom      | Element             | Notes               | ANC1 | Haplotype |
| GL64                                                                               |        |              | AT2       |        |                | France      | Paris city                  | Bercy                     | River turbary deposits | GSXV 13 C2       | Chassen culture         | early 4th Mill BC             | domestic      | mandible            |                     |      | ANC-Cside |
| GL694                                                                              |        |              | AT2       |        |                | France      | Paris city                  | Bercy                     | River turbary deposits | GSKI 16 C21      | Chassen culture         | early 4th Mill BC             | domestic      | mandible            |                     |      |           |
| GL355                                                                              |        |              | AT2       |        |                | France      | Paris city                  | Bercy                     | River turbary deposits |                  | Chassen culture         | early 4th Mill BC             | domestic      | incisor             |                     |      |           |
| GL445                                                                              |        |              | AT2       |        |                | France      | Paris city                  | Bercy                     | River turbary deposits | GLXLIV 05 C21    | Chassen culture         | early 4th Mill BC             | domestic      | mandible            |                     |      | ANC-Y1-6A |
| GL457                                                                              |        |              | AT2       |        |                | France      | Paris city                  | Bercy                     | River turbary deposits |                  | Chassen culture         | early 4th Mill BC             | domestic      | bone                |                     |      |           |
| GL461                                                                              |        |              | AT2       |        |                | France      | Paris city                  | Bercy                     | River turbary deposits | GSNXXIX 24 C 15b | Chassen culture         | early 4th Mill BC             | domestic      | mandible            |                     |      |           |
| GL427                                                                              |        |              | AT2       |        |                | France      | Paris city                  | Bercy                     | River turbary deposits | GLXLIV 05 C21    | Chassen culture         | early 4th Mill BC             | domestic      | mandible            |                     |      |           |
| GL828                                                                              |        |              | JDV / AT2 | 1      |                | France      | Lot. Quercy, SW France      | Roucadour                 | open, drv              | C2a              | Mid Neolithic           | c. 4.200-3.500 BC cal?        | wild          | lower M1/2          |                     |      |           |
| GL841                                                                              |        |              | JDV / AT2 | 2      |                | France      | Lot. Quercy, SW France      | Roucadour                 | open, drv              | C2a              | Mid Neolithic           | c. 4.200-3.500 BC cal?        | wild          | lower M1/2          |                     |      |           |
| GL322                                                                              |        |              | JDV / AT2 | 3      |                | France      | Lot. Quercy, SW France      | Roucadour                 | open, drv              | C2a              | Mid Neolithic           | c. 4.200-3.500 BC cal?        | wild          | lower M1/2          |                     |      |           |
| GL321                                                                              |        |              | JDV / AT2 | 6      |                | France      | Lot. Quercy, SW France      | Roucadour                 | open, drv              | C2a              | Mid Neolithic           | c. 4.200-3.500 BC cal?        | wild          | lower incisor       |                     |      | ANC-Aside |
| GL470                                                                              |        |              | JDV / AT2 | 8      |                | France      | Lot. Quercy, SW France      | Roucadour                 | open, drv              | C2b              | Mid Neolithic           | c. 4.200-3.500 BC cal?        | wild          | lower premolar      |                     |      | ANC-Aside |
| GL485                                                                              |        |              | JDV / AT2 | 10     |                | France      | Lot. Quercy, SW France      | Roucadour                 | open, drv              | C2b              | Mid Neolithic           | c. 4.200-3.500 BC cal?        | wild          | upper premolar      |                     |      | ANC-Aside |
| GL490                                                                              |        |              | J-DV / DH |        |                | France      | Ardeche, SE France          | B. Oulens                 | Cave                   |                  | Neolithic (Cardial)     | 6185 ± 68 [5306-4962] cal BC  | wild          | 2nd phal            |                     |      | ANC-Cside |
| GL491                                                                              |        |              | J-DV / DH |        |                | France      | Ardeche, SE France          | B. Oulens                 | Cave                   |                  | Neolithic (Cardial)     | 6.361 ± 66 [5471-5221] cal BC | domestic?     | 2nd phal            |                     |      | ANC-Cside |
| GL310                                                                              |        |              | J-DV      | 38     |                | France      | Corsica                     | Cucuruzzu                 | stone structure, drv   | 2a               | Bronze/Iron             | 1800-500 BC cal               | dom/feral     | upper M3            |                     |      |           |
| GL1027                                                                             |        |              | ABU-DV    | FR 1   |                | France      | Seine-&Marne, Yonne Valley  | Boulancourt, 26, caree J6 | Fosse ext              |                  | Final Bronze Age IIIb   | ca. 900-700 cal. BC           | domestic      | Tooth lower left M2 | 30-36 months        |      | ANC-Aside |
| GL1028                                                                             |        |              | ABU-DV    | FR 2   |                | France      | Seine-&Marne, Yonne Valley  | Boulancourt, 33, caree AB | Fosse ext              |                  | Final Bronze Age IIIb   | ca. 900-700 cal. BC           | domestic      | Tooth lower left M2 | 24-30 months female |      | ANC-Aside |
| GL308                                                                              |        |              | J-DV / MM | 33     |                | France      | Corsica                     | Ota                       | open, drv              |                  | 15th cent AD            | 15th cent AD                  | dom/feral     | lower can fem       |                     |      | ANC-Aside |
| GL315                                                                              |        |              | J-DV / MM | 34     |                | France      | Corsica                     | Ota                       | open, drv              |                  | 15th cent AD            | 15th cent AD                  | dom/feral     | upper incisor       |                     |      | ANC-Aside |
| GL369                                                                              |        |              | J-DV / MM | 35     |                | France      | Corsica                     | Ota                       | open, drv              |                  | 15th cent AD            | 15th cent AD                  | dom/feral     | upper incisor       |                     |      | ANC-Aside |
| GL822                                                                              |        |              | J-DV / MM | 36     |                | France      | Corsica                     | Ota                       | open, drv              |                  | 15th cent AD            | 15th cent AD                  | dom/feral     | upper incisor       |                     |      | ANC-Aside |
| GL319                                                                              |        |              | J-DV      | 39     |                | France      | Corsica                     | Urtolo                    | open, drv              | Bouquette W Couv | 15th cent AD            | 15th cent AD                  | dom/feral     | lower p4            |                     |      | ANC-Aside |
| GL318                                                                              |        |              | J-DV      | 40     |                | France      | Corsica                     | Urtolo                    | open, drv              | Bouquette W Couv | 15th cent AD            | 15th cent AD                  | dom/feral     | lower M1/2          |                     |      | ANC-Aside |
| GL489                                                                              |        |              | J-DV      | 42     |                | France      | Corsica                     | Urtolo                    | open, drv              | Bouquette W Couv | 15th cent AD            | 15th cent AD                  | dom/feral     | lower milk inc      |                     |      | ANC-Aside |
| GL998                                                                              |        | X            | J-DV      | 44     |                | France      | Corsica                     | Urtolo                    | open, drv              | MVII             | 15th cent AD            | 15th cent AD                  | dom/feral     | upper 11            |                     |      | ANC-Y2-5A |
| GL883                                                                              |        | X            | J-DV      | 45     |                | France      | Corsica                     | Urtolo                    | open, drv              | MVII             | 15th cent AD            | 15th cent AD                  | dom/feral     | upper M1/2          |                     |      |           |
| GL997                                                                              |        |              | J-DV      | 46     |                | France      | Corsica                     | Urtolo                    | open, drv              | MVII Couche 3    | 15th cent AD            | 15th cent AD                  | dom/feral     | upper P4            |                     |      | ANC-Aside |
| GL840                                                                              |        |              | J-DV / TC | 23     |                | France      | Corsica                     | Rosolino                  | open, drv              | 1044             | 14th cent AD            | 14th cent AD                  | dom/feral     | lower incisor       |                     |      | ANC-Aside |
| GL317                                                                              |        |              | J-DV / TC | 23     |                | France      | Corsica                     | Rosolino                  | open, drv              | 2030             | 13th cent AD            | 13th cent AD                  | dom/feral     | upper incisor       |                     |      | ANC-Aside |
| GL324                                                                              |        |              | J-DV / TC | 24     |                | France      | Corsica                     | Rosolino                  | open, drv              | 2030             | 13th cent AD            | 13th cent AD                  | dom/feral     | upper milk inc      |                     |      | ANC-Aside |
| GL837                                                                              |        |              | J-DV / TC | 26     |                | France      | Corsica                     | Rosolino                  | open, drv              | 2030             | 13th cent AD            | 13th cent AD                  | dom/feral     | lower can fem       |                     |      | ANC-Aside |
| Iceland                                                                            |        |              |           |        |                |             |                             |                           |                        |                  |                         |                               |               |                     |                     |      |           |
| GL341                                                                              |        |              | TM        | 2      |                | Iceland     | North-East Iceland          | Hofstadir                 | open, drv              | unit/G ctx004    | 10th cent AD            | 10th cent AD                  | domestic      | ulna                |                     |      | ANC-Aside |
| GL361                                                                              |        |              | TM        | 4      |                | Iceland     |                             | Hirshedir                 | open, drv              | HRH01 G ctx003   | Early med/Viking        | 9th-12th cent AD              | domestic      | ulna                |                     |      | ANC-Aside |
| Ireland                                                                            |        |              |           |        |                |             |                             |                           |                        |                  |                         |                               |               |                     |                     |      |           |
| A238                                                                               |        |              | FM2       | WB 01  | ---            | Ireland     | County Limerick             | Ballycaghane Lower        |                        | 8340± 110bp      |                         | Mesolithic                    | wild          | ulna                |                     |      |           |
| A239                                                                               |        |              | FM2       | WB 02  | ---            | Ireland     | County Limerick             | Ballycaghane Lower        |                        | 4000 BC          |                         | Mesolithic                    | wild          | ulna                |                     |      |           |
| A240                                                                               |        |              | FM2       | WB 03  | ---            | Ireland     | County Limerick             | Ballycaghane Lower        |                        |                  |                         | Mesolithic                    | wild          | metacarpal          |                     |      |           |
| A241                                                                               |        |              | FM2       | WB 04  | ---            | Ireland     | County Limerick             | Ballycaghane Lower        |                        |                  |                         | Mesolithic                    | wild          | humerus             |                     |      |           |
| A242                                                                               |        |              | FM2       | WB 05  | LMC98 F1601    | Ireland     | County Meath                | Moynaagh Cranmoq          |                        |                  |                         | -4000 BC                      | wild          | cervical vertebra   |                     |      |           |
| A243                                                                               |        |              | FM2       | WB 06  | MC98 F1604     | Ireland     | County Meath                | Moynaagh Cranmoq          |                        |                  |                         | ~5000 BC                      | wild          | bone                |                     |      |           |
| A244                                                                               |        |              | FM2       | WB 07  | MC98 F1604     | Ireland     | County Meath                | Moynaagh Cranmoq          |                        |                  |                         | 3868 ± 60 cal BC              | undetermined  | patella             |                     |      |           |
| A352                                                                               |        |              | NM1       | WB 08  | NMING- FZ1156: | Ireland     | County Waterford            | Kilgreany                 |                        |                  |                         | 7358 ± 138 cal BC             | wild          | metapodial          |                     |      | ANC-Cside |
| GL360                                                                              |        |              | LWV-B     | 1      | 931            | Ireland     | County Meath                | Newgrange                 | enclosure, open, drv   |                  | Neolithic               | 3000 BC?                      | undetermined? | incisor             |                     |      |           |
| GL442                                                                              |        |              | LWV-B     | 2      | 155/2          | Ireland     | County Meath                | Newgrange                 | enclosure, open, drv   |                  | Neolithic               | 3000 BC?                      | domestic?     | incisor             |                     |      | ANC-Aside |
| GL368                                                                              |        |              | LWV-B     | 3      | 3-Feb          | Ireland     | County Meath                | Newgrange                 | enclosure, open, drv   |                  | Neolithic               | 3000 BC?                      | undetermined  | premlar             |                     |      |           |
| GL443                                                                              |        |              | LWV-B     | 4      | 146/2          | Ireland     | County Meath                | Newgrange                 | enclosure, open, drv   |                  | Neolithic               | 3000 BC?                      | undetermined  | premlar             |                     |      |           |
| GL444                                                                              |        |              | LWV-B     | 5      | 171/3          | Ireland     | County Meath                | Newgrange                 | enclosure, open, drv   |                  | Neolithic               | 3000 BC?                      | undetermined  | premlar             |                     |      |           |
| Netherlands                                                                        |        |              |           |        |                |             |                             |                           |                        |                  |                         |                               |               |                     |                     |      |           |
| GL843                                                                              |        |              | RL        | 1      | 21551/1        | Netherlands | Noord Holland               | Hardinveldt Polderw       | open, waterlogged      |                  | late Meso (6th mill BC) | 5500-5300 BC cal              | wild          | upper incisor       |                     |      |           |
| GL888                                                                              |        |              | RL        | 2      | 11283          | Netherlands | Noord Holland               | Hardinveldt Polderw       | open, waterlogged      |                  | late Meso (6th mill BC) | 5500-5300 BC cal              | wild          | upper can fe        |                     |      |           |
| GL295                                                                              |        |              | RL        | 5      | 25870          | Netherlands | Noord Holland               | Hardinveldt Polderw       | open, waterlogged      |                  | late Meso (6th mill BC) | 5500-5300 BC cal              | wild          | lower incisor       |                     |      |           |
| GL865                                                                              |        |              | RL        | 7      | 13665          | Netherlands | Noord Holland               | Hardinveldt Polderw       | open, waterlogged      |                  | late Meso (6th mill BC) | 5500-5300 BC cal              | wild          | lower M1/2          |                     |      |           |
| GL850                                                                              |        |              | RL        | 11     | 110701         | Netherlands | Noord Holland               | Hardinveldt Polderw       | open, waterlogged      |                  | late Meso (6th mill BC) | 5500-5300 BC cal              | wild          | lower premolar      |                     |      |           |
| GL292                                                                              |        |              | RL        | 14     | 4902           | Netherlands | Noord Holland               | Hardinveldt Polderw       | open, waterlogged      |                  | late Meso (6th mill BC) | 5500-5300 BC cal              | wild          | upper incisor       |                     |      |           |
| GL299                                                                              |        |              | RL        | 19     | 11274          | Netherlands | Noord Holland               | Hardinveldt DeBruin       | open, waterlogged      | phase 1          | Late Mesolithic         | 5500-5100 BC cal              | wild          | lower incisor       |                     |      |           |
| GL298                                                                              |        |              | RL        | 20     | 8357           | Netherlands | Noord Holland               | Hardinveldt DeBruin       | open, waterlogged      | phase 1          | Late Mesolithic         | 5500-5100 BC cal              | wild          | lower incisor       |                     |      |           |
| GL297                                                                              |        |              | RL        | 20     | 8357           | Netherlands | Noord Holland               | Hazendonk                 | open                   | IIb              | Mid Neolithic           | 4100-3400 BC cal              | undetermined  | lower M3            |                     |      |           |
| GL821                                                                              |        |              | RL        | 21     | 1442           | Netherlands | Noord Holland               | Hazendonk                 | open                   | I                | Mid Neolithic           | 4100-3400 BC cal              | undetermined  | upper premolar      |                     |      |           |
| GL297                                                                              |        |              | RL        | 22     | 28896          | Netherlands | Noord Holland               | Hazendonk                 | open                   | II               | Mid Neolithic           | 4100-3400 BC cal              | undetermined  | lower M1/2          |                     |      |           |
| GL294                                                                              |        |              | RL        | 25     | 2614           | Netherlands | Noord Holland               | Hardinveldt DeBruin       | open                   | phase 3          | Early Neolithic         | 4700-4450 BC cal              | undetermined  | lower M1/2          |                     |      |           |
| GL294                                                                              |        |              | RL        | 28     | 24758          | Netherlands | Flevoland                   | Swifterbant - S3          | open                   |                  | Mid Neolithic           | 4100-3400 BC cal              | undetermined  | upper incisor       |                     |      |           |
| GL877                                                                              |        |              | RL        | 29     | 910185         | Netherlands | Flevoland                   | Swifterbant - S3          | open                   |                  | Mid Neolithic           | 4100-3400 BC cal              | undetermined  | upper incisor       |                     |      |           |
| GL389                                                                              |        |              | RL        | 31a    | 38654          | Netherlands | Flevoland                   | Swifterbant - S3          | open                   |                  | Mid Neolithic           | 4100-3400 BC cal              | undetermined  | lower incisor       |                     |      | ANC-Aside |
| GL801                                                                              |        |              | RL        | 31b    | 29321          | Netherlands | Flevoland                   | Swifterbant - S3          | open                   |                  | Mid Neolithic           | 4100-3400 BC cal              | undetermined  | lower incisor       |                     |      |           |
| GL807                                                                              |        |              | RL        | 34     | 20107          | Netherlands | Flevoland                   | Swifterbant - S3          | open                   |                  | Mid Neolithic           | 4100-3400 BC cal              | undetermined  | lower M3            |                     |      |           |
| GL835                                                                              |        |              | RL        | 47     | 6357           | Netherlands | Flevoland                   | p14                       | open                   |                  | Neo/Bronze              | 2500-1500 BC cal              | undetermined  | lower M3            |                     |      |           |
| GL371                                                                              |        |              | RL        | 41     | 14771          | Netherlands | Gelderland                  | Gelderland                | urban                  |                  | 70-120 AD               | domestic?                     | wild          | lower incisor       |                     |      |           |
| GL160                                                                              |        |              | RL        |        |                | Netherlands | Gelderland                  | Nijmegen                  | urban, drv             | 161-22-27        | Roman 0-70 AD           | 0-70 AD                       | undetermined  | jaw fragment        |                     |      | ANC-Aside |
| GL323                                                                              |        |              | RL        |        |                | Netherlands | Gelderland                  | Nijmegen                  | urban, drv             | 212-65-68        | Roman 0-70 AD           | 0-70 AD                       | undetermined  | tooth fragment      |                     |      |           |
| GL806                                                                              |        |              | RL        |        |                | Netherlands | Gelderland                  | Nijmegen                  | urban, drv             | 218-65-25        | Roman 0-70 AD           | 0-70 AD                       | undetermined  | jaw fragment        |                     |      | ANC-Cside |
| GL208                                                                              |        |              | KP/DM/JG1 |        | NS16           | Netherlands | Brown bank/ridge, North Sea | Southern Bight            | sea floor              |                  |                         |                               |               | humerus             |                     |      | ANC-Cside |
| GL209                                                                              |        |              | KP/DM/JG1 |        | NS15           | Netherlands | Brown bank/ridge, North Sea | Southern Bight            | sea floor              |                  |                         |                               |               | radius              |                     |      | ANC-Cside |
| GL210                                                                              |        |              | KP/DM/JG1 |        | JG202          | Netherlands | 52 63 862N 002 23 471E      | Southern Bight            | sea floor              |                  |                         |                               |               | metacarpal          |                     |      | ANC-Cside |
| GL211                                                                              |        |              | KP/DM/JG1 |        | NS13           | Netherlands | Brown bank/ridge, North Sea | Southern Bight            | sea floor              |                  |                         |                               |               | tibia               |                     |      | ANC-Aside |
| GL212                                                                              |        |              | KP/DM/JG1 |        | NS14           | Netherlands | Brown bank/ridge, North Sea | Southern Bight            | sea floor              |                  |                         |                               |               | tibia               |                     |      | ANC-Aside |
| GL516                                                                              |        |              | KP/DM/JG1 |        | NS37           | Netherlands | Brown bank/ridge, North Sea | Southern Bight            | sea floor              |                  |                         |                               |               | tibia               |                     |      | ANC-Cside |
| GL515                                                                              |        |              | KP/DM/JG1 |        | NS38           | Netherlands | Brown bank/ridge, North Sea | Southern Bight            | sea floor              |                  |                         |                               |               | tibia               |                     |      | ANC-Aside |
| GL544                                                                              |        |              | KP/DM/JG1 |        | NS42           | Netherlands | Brown bank/ridge, North Sea | Southern Bight            | sea floor              |                  |                         |                               |               | humerus             |                     |      | ANC-Cside |
| Portugal                                                                           |        |              |           |        |                |             |                             |                           |                        |                  |                         |                               |               |                     |                     |      |           |

| Table 5. A list of all novel obtained, extracted, and sequenced ancient specimens.                                                                                                                                                                                                                                   |        |              |        |       |              |               |                     |                         |                             |                    |                           |                     |              | ANC1            | Haplotype           |  |
|----------------------------------------------------------------------------------------------------------------------------------------------------------------------------------------------------------------------------------------------------------------------------------------------------------------------|--------|--------------|--------|-------|--------------|---------------|---------------------|-------------------------|-----------------------------|--------------------|---------------------------|---------------------|--------------|-----------------|---------------------|--|
| Extract                                                                                                                                                                                                                                                                                                              | Cloned | Exter Replic | Source | Sam # | Spec. #      | Country       | Location            | Site code               | Site type                   | Context            | Phase                     | Dating              | Wild/Dom     | Element         | Notes               |  |
| GL452                                                                                                                                                                                                                                                                                                                |        |              | CD     | 33    | 2002.83.76   | Portugal      | North-West Alentejo | Cabeço do Pez           | open, drv                   | T1B Sq4 Ly2        | late Mesolithic           | 5500-4500 BC cal    | wild         | low inc         |                     |  |
| GL300                                                                                                                                                                                                                                                                                                                |        |              | CD     | 34    | 2002.77.88   | Portugal      | North-West Alentejo | Cabeço do Pez           | open, drv                   | T1B Sq3 Ly2        | late Mesolithic           | 5500-4500 BC cal    | wild         | low inc         |                     |  |
| GL472                                                                                                                                                                                                                                                                                                                |        |              | CD     | 35    | 2002.151.161 | Portugal      | North-West Alentejo | Cabeço do Pez           | open, drv                   | T1B Sq4 Ly2        | late Mesolithic           | 5500-4500 BC cal    | wild         | low inc         |                     |  |
| GL454                                                                                                                                                                                                                                                                                                                |        | X            | SD     | 1     |              | Portugal      | Estremadura         | Zambual                 | trenched settlement, drv    | Z274               | Chalcolithic/Early Bronze | 2,600-1,800 BC cal? | wild?        | lower I3        |                     |  |
| GL840                                                                                                                                                                                                                                                                                                                |        |              | SD     | 2     |              | Portugal      | Estremadura         | Zambual                 | trenched settlement, drv    | Z296               | Chalcolithic/Early Bronze | 2,600-1,800 BC cal? | domestic?    | lower I3        |                     |  |
| GL855                                                                                                                                                                                                                                                                                                                |        |              | SD     | 5     |              | Portugal      | Estremadura         | Zambual                 | trenched settlement, drv    | ?                  | Chalcolithic/Early Bronze | 2,600-1,800 BC cal? | domestic?    | lower I3        |                     |  |
| GL487                                                                                                                                                                                                                                                                                                                |        |              | SD     | 12    |              | Portugal      | Estremadura         | Zambual                 | trenched settlement, drv    | ?                  | Chalcolithic/Early Bronze | 2,600-1,800 BC cal? | domestic?    | lower tremolar  |                     |  |
| GL333                                                                                                                                                                                                                                                                                                                |        |              | SD     | 14    |              | Portugal      | Estremadura         | Zambual                 | trenched settlement, drv    | Z885               | Chalcolithic/Early Bronze | 2,600-1,800 BC cal? | wild?        | lower M3        |                     |  |
| GL332                                                                                                                                                                                                                                                                                                                |        |              | SD     | 15    |              | Portugal      | Estremadura         | Zambual                 | trenched settlement, drv    | ?                  | Chalcolithic/Early Bronze | 2,600-1,800 BC cal? | wild?        | lower M3        |                     |  |
| GL331                                                                                                                                                                                                                                                                                                                |        |              | SD     | 16    |              | Portugal      | Estremadura         | Zambual                 | trenched settlement, drv    | ?                  | Chalcolithic/Early Bronze | 2,600-1,800 BC cal? | domestic?    | lower M3        |                     |  |
| GL357                                                                                                                                                                                                                                                                                                                |        |              | SD     | 17    |              | Portugal      | Estremadura         | Zambual                 | trenched settlement, drv    | Z429               | Chalcolithic/Early Bronze | 2,600-1,800 BC cal? | domestic?    | lower M3        |                     |  |
| GL358                                                                                                                                                                                                                                                                                                                |        |              | SD     | 20    |              | Portugal      | Estremadura         | Zambual                 | trenched settlement, drv    | Z485               | Chalcolithic/Early Bronze | 2,600-1,800 BC cal? | domestic?    | lower M3        |                     |  |
| GL836                                                                                                                                                                                                                                                                                                                |        |              | SD     | 22    |              | Portugal      | Estremadura         | Zambual                 | trenched settlement, drv    | Z499               | Chalcolithic/Early Bronze | 2,600-1,800 BC cal? | wild?        | fra low can mal |                     |  |
| GL879                                                                                                                                                                                                                                                                                                                |        |              | SD     | 24    |              | Portugal      | Estremadura         | Zambual                 | trenched settlement, drv    | Z9039              | Chalcolithic/Early Bronze | 2,600-1,800 BC cal? | domestic?    | upper can fem   |                     |  |
| GL465                                                                                                                                                                                                                                                                                                                |        |              | SD     | 27    |              | Portugal      | Estremadura         | Zambual                 | trenched settlement, drv    | Z1185              | Chalcolithic/Early Bronze | 2,600-1,800 BC cal? | domestic?    | upper can fem   |                     |  |
| GL285                                                                                                                                                                                                                                                                                                                |        |              | SD     | 28    |              | Portugal      | Estremadura         | Zambual                 | trenched settlement, drv    | Z994               | Chalcolithic/Early Bronze | 2,600-1,800 BC cal? | domestic?    | upper can fem   |                     |  |
| GL819                                                                                                                                                                                                                                                                                                                |        |              | SD     | 31    |              | Portugal      | Estremadura         | Zambual                 | trenched settlement, drv    | Z623               | Chalcolithic/Early Bronze | 2,600-1,800 BC cal? | wild?        | fra low can mal |                     |  |
| GL1038                                                                                                                                                                                                                                                                                                               |        |              | CD     | 322   |              | Portugal      | Ribatejo            | C. Amoreira             |                             | square: HI 6 Troco | center Layer              |                     | wild?        | tooth           |                     |  |
| GL1039                                                                                                                                                                                                                                                                                                               |        |              | OD     | 330   |              | Portugal      | Ribatejo            | C. Arruda               |                             | square: LM 6 Troco | center Layer              |                     | wild?        | tooth           |                     |  |
| Scotland                                                                                                                                                                                                                                                                                                             |        |              |        |       |              |               |                     |                         |                             |                    |                           |                     |              |                 |                     |  |
| GL457                                                                                                                                                                                                                                                                                                                |        |              | FH     | 1     |              | Scotland      | Isle of Skye        | High Pasture Cave       | subterranean ritual deposit | Isle of Skye       | Iron Age                  | 350-100BC           | domestic     | incisor         |                     |  |
| GL330                                                                                                                                                                                                                                                                                                                |        |              | TM     | 1     |              | Faroe Islands |                     | Junkavns Fløtvi, Sandur | open, drv                   | unit/UJ.cxd06      | c.AD1100                  | c.AD1100            | domestic     | ulna            |                     |  |
| Sweden                                                                                                                                                                                                                                                                                                               |        |              |        |       |              |               |                     |                         |                             |                    |                           |                     |              |                 |                     |  |
| GL453                                                                                                                                                                                                                                                                                                                |        |              | GB/NO  | 2     |              | Sweden        | Göland              | Avide                   | coastal settlement          | Layer III          | Middle Neolithic          | 2800-2500 cal BC    | undetermined | canine          | Pitted Ware culture |  |
| GL488                                                                                                                                                                                                                                                                                                                |        |              | GB/NO  | 4     |              | Sweden        | Göland              | Avide                   | coastal settlement          | GO94, Layer III    | Middle Neolithic          | 2800-2500 cal BC    | undetermined | M1, canine      | Pitted Ware culture |  |
| GL474                                                                                                                                                                                                                                                                                                                |        |              | GB/NO  | 5     |              | Sweden        | Göland              | Avide                   | coastal settlement          | GO97               | Middle Neolithic          | 2800-2500 cal BC    | undetermined | M3              | Pitted Ware culture |  |
| GL459                                                                                                                                                                                                                                                                                                                |        |              | GB/NO  | 6     |              | Sweden        | Göland              | Avide                   | coastal settlement          | GO97, Layer III    | Middle Neolithic          | 2800-2500 cal BC    | undetermined | incisor x2      | Pitted Ware culture |  |
| GL316                                                                                                                                                                                                                                                                                                                |        |              | GB/NO  | 7     |              | Sweden        | Göland              | Avide                   | coastal settlement          | GO97, Layer II     | Middle Neolithic          | 2800-2500 cal BC    | undetermined | canine          | Pitted Ware culture |  |
| <b>Extraction #:</b> The code given to each individual                                                                                                                                                                                                                                                               |        |              |        |       |              |               |                     |                         |                             |                    |                           |                     |              |                 |                     |  |
| <b>Cloned:</b> An "X" indicates that this sample was cloned at the Ancient Biomolecules Centre in Oxford. At least eight cloned sequences were examined in each case.                                                                                                                                                |        |              |        |       |              |               |                     |                         |                             |                    |                           |                     |              |                 |                     |  |
| <b>External replication:</b> An "X" in this column indicates that the sample was externally replicated either in Adelaide, Australia, by Alan Cooper and Gavnor Dolman, in Basel, Switzerland, by Angela Schlumbaum, or, if the original work was carried out in Switzerland, by Greger Larson at Oxford University. |        |              |        |       |              |               |                     |                         |                             |                    |                           |                     |              |                 |                     |  |
| <b>Source:</b> The codes for the museums and individuals from which material was generously provided are as follows:                                                                                                                                                                                                 |        |              |        |       |              |               |                     |                         |                             |                    |                           |                     |              |                 |                     |  |
| AB: Adrian Bălăşescu, National History Museum of Romania, National Center of Pluridisciplinary Research, 12 Calea Victoriei, 30026 Bucharest, Romania                                                                                                                                                                |        |              |        |       |              |               |                     |                         |                             |                    |                           |                     |              |                 |                     |  |
| AC: Andrew Chamberlain, Department of Archaeology, University of Sheffield, Northgate House, West Street, Sheffield S1 4ET, United Kingdom                                                                                                                                                                           |        |              |        |       |              |               |                     |                         |                             |                    |                           |                     |              |                 |                     |  |
| AD: Alexandra Dima, UW Madison, Anthropology Department, 1180 Observatory Drive, 5240 Social Science Building, Madison, WI, 53706                                                                                                                                                                                    |        |              |        |       |              |               |                     |                         |                             |                    |                           |                     |              |                 |                     |  |
| AE: Anton Evroevck, Flemish Heritage Institute, Konink Albert II-kaan 19, box 5, B-1210 Brussels, Belgium                                                                                                                                                                                                            |        |              |        |       |              |               |                     |                         |                             |                    |                           |                     |              |                 |                     |  |
| AF: Andy Hammon, English Heritage, 37 Tanner Row, York YO1 6WP, UK                                                                                                                                                                                                                                                   |        |              |        |       |              |               |                     |                         |                             |                    |                           |                     |              |                 |                     |  |
| AM: Augusta McMahon, Faculty of Oriental Studies and Archaeology and Anthropology, University of Cambridge, Sidwick Avenue, Cambridge CB3 9DA, UK, Rm 208, Sidwick Avenue, Cambridge CB3 9DA, UK                                                                                                                     |        |              |        |       |              |               |                     |                         |                             |                    |                           |                     |              |                 |                     |  |
| AT1: Antonio Tafiachoz, Soprintendenza Speciale al Museo Nazionale Preistorico Etnografico L. Pigorini, Sezione di Paleontologia del Quaternario e Archeozoologia, Piazzale G. Marconi 14, 00144 Roma, Italy                                                                                                         |        |              |        |       |              |               |                     |                         |                             |                    |                           |                     |              |                 |                     |  |
| AT2: Anne Tresselt, CNRS - Muséum national d'Histoire naturelle, Dent Evolevol and Biodiversity Management, USM 303, Case postale 56, 57 rue Cuvier, F-75231 Paris cedex 05, France                                                                                                                                  |        |              |        |       |              |               |                     |                         |                             |                    |                           |                     |              |                 |                     |  |
| CC: Chiara Cavallo, Amsterdams Archeologisch Centrum (AAC) / University of Amsterdam Nwe Prinsengracht 130, 1018 VZ Amsterdam, the Netherlands                                                                                                                                                                       |        |              |        |       |              |               |                     |                         |                             |                    |                           |                     |              |                 |                     |  |
| CD: Cleia Detry, R. Prof. Alfredo de Sousa nº 8/B, 1600-1800 Lisboa, Portugal                                                                                                                                                                                                                                        |        |              |        |       |              |               |                     |                         |                             |                    |                           |                     |              |                 |                     |  |
| CM1: Claudine Malone, Department of Archaeology, University of Cambridge, Downing Street, Cambridge CB2 3DZ, UK                                                                                                                                                                                                      |        |              |        |       |              |               |                     |                         |                             |                    |                           |                     |              |                 |                     |  |
| CM2: Chiaia Minitti, Laboratorio di Archeologia, Soprintendenza Archeologica di Roma, Palazzo Alemans, v. S. Apollinare, 8 - 00186 ROMA, Italy                                                                                                                                                                       |        |              |        |       |              |               |                     |                         |                             |                    |                           |                     |              |                 |                     |  |
| DH: Daniel Helmer, UMR 5133 Archeorient, Maison de l'Orient et de la Méditerranée, Antenne de Jalès, F-07460 Berrias, France                                                                                                                                                                                         |        |              |        |       |              |               |                     |                         |                             |                    |                           |                     |              |                 |                     |  |
| DK: Derek Kennet, Department of Archaeology, University of Durham, South Road, Durham DH1 3L                                                                                                                                                                                                                         |        |              |        |       |              |               |                     |                         |                             |                    |                           |                     |              |                 |                     |  |
| DM: Dick Mol, Natural History Museum, Rotterdam, Westzeedijk 345, NL-3015 AA Rotterdam The Netherlands                                                                                                                                                                                                               |        |              |        |       |              |               |                     |                         |                             |                    |                           |                     |              |                 |                     |  |
| FH: Fraser Hunter, Department of Archaeology, National Museums of Scotland, Queen Street, Edinburgh EH1 1JD, Scotland                                                                                                                                                                                                |        |              |        |       |              |               |                     |                         |                             |                    |                           |                     |              |                 |                     |  |
| FMNH: Field Museum of Natural History, Division of Mammals, 1400 S Lake Shore Drive, Chicago, Illinois 60605 (Bill Stanley)                                                                                                                                                                                          |        |              |        |       |              |               |                     |                         |                             |                    |                           |                     |              |                 |                     |  |
| FMI: Filippo Macconi, Via Daniele Manni 25, Tempio Pausanias (SS) 07029, Italy                                                                                                                                                                                                                                       |        |              |        |       |              |               |                     |                         |                             |                    |                           |                     |              |                 |                     |  |
| FM2: Finbar McCormick, School of Archaeology and Palaeoecology, Queen's University Belfast, Belfast BT7 1NN, UK                                                                                                                                                                                                      |        |              |        |       |              |               |                     |                         |                             |                    |                           |                     |              |                 |                     |  |
| GB: Göran Burenbul, Gotland University College, Cramérstratan 3, 62157 Visby, Sweden                                                                                                                                                                                                                                 |        |              |        |       |              |               |                     |                         |                             |                    |                           |                     |              |                 |                     |  |
| HI: Hitomi Hongo, Advanced Science, Graduate University for Advanced Studies, Shonan Village, Hayama, Miura, Kanagawa, 240-0193, Japan                                                                                                                                                                               |        |              |        |       |              |               |                     |                         |                             |                    |                           |                     |              |                 |                     |  |
| HD: Hans-Jürgen Döble, Landesamt für Archäologie, Sachsen-Anhalt-Landesmuseum für Vorgeschichte, Richard Wagner Strasse 9-10, 06114 Halle (Saale), Germany                                                                                                                                                           |        |              |        |       |              |               |                     |                         |                             |                    |                           |                     |              |                 |                     |  |
| IO: Inger Österholm, Gotland University College, Cramérstratan 3, 62157 Visby, Sweden                                                                                                                                                                                                                                |        |              |        |       |              |               |                     |                         |                             |                    |                           |                     |              |                 |                     |  |
| J-DV: Jean-Denis Vigne, CNRS, Muséum National d'Histoire Naturelle, UMR 5197, Dpt Ecologie et Gestion de la Biodiversité, Bat. 56, 57 rue Cuvier, F-75231, Paris cedex 05, France                                                                                                                                    |        |              |        |       |              |               |                     |                         |                             |                    |                           |                     |              |                 |                     |  |
| JG1: Jan Glimmerveen, Anna Paulownastraat 25A, 2518 BA Den Haag, The Netherlands                                                                                                                                                                                                                                     |        |              |        |       |              |               |                     |                         |                             |                    |                           |                     |              |                 |                     |  |
| JG2: Jacopo de Grossi Mazzorin, Dipartimento di Beni Culturali, Via D. Birago, 64, 73100 Lecce, Italy                                                                                                                                                                                                                |        |              |        |       |              |               |                     |                         |                             |                    |                           |                     |              |                 |                     |  |
| JJ: T. Justin Lev-Tov, Hackenheimerstr. 43, 55545 Bad Kreuznach, Germany                                                                                                                                                                                                                                             |        |              |        |       |              |               |                     |                         |                             |                    |                           |                     |              |                 |                     |  |
| JS: Jörg Schibler, Institute of Prehistory and Archaeological Science (IPAS), Basel University, Switzerland, Bones searched from the archaeological Services from cantons Graubünden, Zürich, Bern, Basel-Stadt and Basel-Landschaft                                                                                 |        |              |        |       |              |               |                     |                         |                             |                    |                           |                     |              |                 |                     |  |
| KAS: Kim Aaris-Sørensen, Zoological Museum, Vertebrate Department, Universitetstræken 15, DK-2100 Copenhagen Ø, Denmark                                                                                                                                                                                              |        |              |        |       |              |               |                     |                         |                             |                    |                           |                     |              |                 |                     |  |
| KP: Klaas Post, Natuurmuseum Rotterdam, Rotterdam, The Netherlands                                                                                                                                                                                                                                                   |        |              |        |       |              |               |                     |                         |                             |                    |                           |                     |              |                 |                     |  |
| KS: Ken Steedman, Humber Archaeology Partnership, The Old School, Northumberland Avenue, Hull, HU2 0LN                                                                                                                                                                                                               |        |              |        |       |              |               |                     |                         |                             |                    |                           |                     |              |                 |                     |  |
| LB: László Bartosiewicz, Institute of Archaeological Sciences, Eötvös Loránd University, Budapest, Hungary                                                                                                                                                                                                           |        |              |        |       |              |               |                     |                         |                             |                    |                           |                     |              |                 |                     |  |
| LKH: Liora Kolska Horwitz, Department of Evolution, Systematics and Ecology, The Hebrew University, Berman Building, Givat Ram, Jerusalem, Israel                                                                                                                                                                    |        |              |        |       |              |               |                     |                         |                             |                    |                           |                     |              |                 |                     |  |
| LWVB: Louise Van Winjaerden-Bakker, Amsterdam Archaeological Center, University of Amsterdam, Turfgraafsteraan 9, 1012 XT Amsterdam, the Netherlands                                                                                                                                                                 |        |              |        |       |              |               |                     |                         |                             |                    |                           |                     |              |                 |                     |  |
| MMH: Marco Masseti, Dipartimento di Biologia Animale e Genetica "I eo Pardi" dell'Università di Firenze, Laboratorio di Antropologia, Firenze, Italy                                                                                                                                                                 |        |              |        |       |              |               |                     |                         |                             |                    |                           |                     |              |                 |                     |  |
| MM2: Maria Mashkova, CNRS - Muséum national d'Histoire naturelle, Dent Evolevol and Biodiversity Management, USM 303, Case postale 56, 57 rue Cuvier, F-75231 Paris cedex 05, France                                                                                                                                 |        |              |        |       |              |               |                     |                         |                             |                    |                           |                     |              |                 |                     |  |
| NB: Norbert Benecke, Deutsches Archäologisches Institut, Referat Naturwissenschaften, Im Dol 2-6, Haus 2, 14195 Berlin, Germany                                                                                                                                                                                      |        |              |        |       |              |               |                     |                         |                             |                    |                           |                     |              |                 |                     |  |
| NMI: Nigel Monaghan, Natural History Division, National Museum of Ireland, Merrion Street, Dublin 2, Ireland                                                                                                                                                                                                         |        |              |        |       |              |               |                     |                         |                             |                    |                           |                     |              |                 |                     |  |
| NM2: Ninna Manaservyan, Institute of Zoology, The National Academy of Sciences of Armenia, 7, Sevag str., Yerevan 375014, Armenia                                                                                                                                                                                    |        |              |        |       |              |               |                     |                         |                             |                    |                           |                     |              |                 |                     |  |
| OF: Ornella Fonzo, Via Lai 2, 09128 Cagliari, Italy                                                                                                                                                                                                                                                                  |        |              |        |       |              |               |                     |                         |                             |                    |                           |                     |              |                 |                     |  |
| PH: Paul Halstead, Department of Archaeology, University of Sheffield, Northgate House, West Street, Sheffield S1 4ET, UK                                                                                                                                                                                            |        |              |        |       |              |               |                     |                         |                             |                    |                           |                     |              |                 |                     |  |
| PML: Preston Miracle, Department of Archaeology, University of Cambridge, Downing Street, Cambridge CB2 3DZ, UK                                                                                                                                                                                                      |        |              |        |       |              |               |                     |                         |                             |                    |                           |                     |              |                 |                     |  |
| PM2: Peabody Museum of Archaeology and Ethnology, 11 Divinity Ave, Cambridge, MA 02138, USA                                                                                                                                                                                                                          |        |              |        |       |              |               |                     |                         |                             |                    |                           |                     |              |                 |                     |  |
| RB: Ruth Bollongnino, Institute for Anthropology, Kolonel-Kleinmann Weg 2, 55128 Mainz, Germany                                                                                                                                                                                                                      |        |              |        |       |              |               |                     |                         |                             |                    |                           |                     |              |                 |                     |  |
| RF: Roel Lauwerij, National Service for Archaeology, Cultural Landscape and Built Heritage (RACM), Kerksstraat 1, NL-3811 CV Amersfoort, the Netherlands                                                                                                                                                             |        |              |        |       |              |               |                     |                         |                             |                    |                           |                     |              |                 |                     |  |

| Table 5. A list of all novel obtained, extracted, and sequenced ancient specimens.                                                                                                                                                                                                                                                                                                                                                                                                                                                                                                                                                                                |        |              |        |        |         |         |          |           |           |         |       |        |          |         |       |      |           |
|-------------------------------------------------------------------------------------------------------------------------------------------------------------------------------------------------------------------------------------------------------------------------------------------------------------------------------------------------------------------------------------------------------------------------------------------------------------------------------------------------------------------------------------------------------------------------------------------------------------------------------------------------------------------|--------|--------------|--------|--------|---------|---------|----------|-----------|-----------|---------|-------|--------|----------|---------|-------|------|-----------|
| Extract                                                                                                                                                                                                                                                                                                                                                                                                                                                                                                                                                                                                                                                           | Cloned | Exter Replic | Source | Samp # | Spec. # | Country | Location | Site code | Site type | Context | Phase | Dating | Wild/Dom | Element | Notes | ANC1 | Haplotype |
| RM1: Roger Matthews, Institute of Archaeology, University College London, 31-34 Gordon Square, London WC1H 0PY, UK                                                                                                                                                                                                                                                                                                                                                                                                                                                                                                                                                |        |              |        |        |         |         |          |           |           |         |       |        |          |         |       |      |           |
| RM2: Zooarcheology Laboratory, Peabody Museum of Archaeology and Ethnology, 11 Divinity Ave, Cambridge, MA 02138, USA                                                                                                                                                                                                                                                                                                                                                                                                                                                                                                                                             |        |              |        |        |         |         |          |           |           |         |       |        |          |         |       |      |           |
| RR: Richard Redding, Museum of Anthropology, 1109 Geddes Avenue, Ann Arbor, Michigan 48109-1079, USA.                                                                                                                                                                                                                                                                                                                                                                                                                                                                                                                                                             |        |              |        |        |         |         |          |           |           |         |       |        |          |         |       |      |           |
| SD: Simon Davis, Instituto Português de Arqueologia, Avenida da Índia 136, P-1300, Lisbon, Portugal                                                                                                                                                                                                                                                                                                                                                                                                                                                                                                                                                               |        |              |        |        |         |         |          |           |           |         |       |        |          |         |       |      |           |
| SH: Susanne Hanik, Brandenburgisches Landesamt für Denkmalpflege und Archäologisches Landesmuseum, Wünsdorfer Platz 4 – 5, D - 15838 Zossen (Ortsteil Wünsdorf), Germany                                                                                                                                                                                                                                                                                                                                                                                                                                                                                          |        |              |        |        |         |         |          |           |           |         |       |        |          |         |       |      |           |
| SS: Simon Stoddart, Magdalene College, University of Cambridge, CB3 0AG, UK                                                                                                                                                                                                                                                                                                                                                                                                                                                                                                                                                                                       |        |              |        |        |         |         |          |           |           |         |       |        |          |         |       |      |           |
| SVP: Sophie Van Poucke, Koninklijk Belgisch Instituut voor Natuurwetenschappen, Afdeling Antropologie en Prehistorie, Vautierstraat 29, 1000 Brussel, Belgium                                                                                                                                                                                                                                                                                                                                                                                                                                                                                                     |        |              |        |        |         |         |          |           |           |         |       |        |          |         |       |      |           |
| TC: Thomas Cucchi, Muséum national Histoire Naturelle, UMR 5197, Case Postale 55, 57 rue Cuvier, F-75231 Paris cedex 05, France.                                                                                                                                                                                                                                                                                                                                                                                                                                                                                                                                  |        |              |        |        |         |         |          |           |           |         |       |        |          |         |       |      |           |
| TM: Thomas McGovern, Anthropology Dept. Hunter College, 695 Park Ave. NYC 10021 USA                                                                                                                                                                                                                                                                                                                                                                                                                                                                                                                                                                               |        |              |        |        |         |         |          |           |           |         |       |        |          |         |       |      |           |
| UA: Umberto Albarella, Department of Archaeology, University of Sheffield, Northgate House, West Street, Sheffield S1 4ET, UK                                                                                                                                                                                                                                                                                                                                                                                                                                                                                                                                     |        |              |        |        |         |         |          |           |           |         |       |        |          |         |       |      |           |
| VD: Valentin Dumitrescu, Institutul de Arheologie, Str Henri Coandă, nr. 11, Sector 1, cod 71113, Bucuresti                                                                                                                                                                                                                                                                                                                                                                                                                                                                                                                                                       |        |              |        |        |         |         |          |           |           |         |       |        |          |         |       |      |           |
|                                                                                                                                                                                                                                                                                                                                                                                                                                                                                                                                                                                                                                                                   |        |              |        |        |         |         |          |           |           |         |       |        |          |         |       |      |           |
| <b>Site code / Context / Phase / Dating / Element:</b> Information presented in these columns was provided by the people who provided the material. The dating information was based upon a variety of means including direct and associated <sup>14</sup> C analysis and stratigraphic or cultural association.                                                                                                                                                                                                                                                                                                                                                  |        |              |        |        |         |         |          |           |           |         |       |        |          |         |       |      |           |
|                                                                                                                                                                                                                                                                                                                                                                                                                                                                                                                                                                                                                                                                   |        |              |        |        |         |         |          |           |           |         |       |        |          |         |       |      |           |
| <b>Wild/Dom:</b> Six different categories are used in this column. “Wild” and “Domestic” mean the samples were unambiguously defined as being one or the other based on methods discussed above. “Undetermined” signifies that no definitive determination could be made (usually as a result of the inappropriateness of the element) and use of question marks after words “wild” or “domestic” indicates there was some doubt in assigning a status. “Dom/feral” indicates that these samples are from an island where all pigs were introduced and therefore most likely to be either fully domestic or living wild (feral), but derived from domestic stock. |        |              |        |        |         |         |          |           |           |         |       |        |          |         |       |      |           |
|                                                                                                                                                                                                                                                                                                                                                                                                                                                                                                                                                                                                                                                                   |        |              |        |        |         |         |          |           |           |         |       |        |          |         |       |      |           |
| <b>ANC1:</b> This column relates to the ~120bp primer pair designed for the analysis of ancient specimens (and used on 10 of the museum specimens) in this study. Sequences derived from the ANC1 pair determined whether the sample belonged to one of 18 haplotypes. A red box indicates the primer pair was attempted but no sequence was derived. A green box indicates the primer pair was attempted and a sequence was obtained. In order for a sequence to be reported, the same primer pair had to reveal the same result on at least two consecutive, independent occasions.                                                                             |        |              |        |        |         |         |          |           |           |         |       |        |          |         |       |      |           |
|                                                                                                                                                                                                                                                                                                                                                                                                                                                                                                                                                                                                                                                                   |        |              |        |        |         |         |          |           |           |         |       |        |          |         |       |      |           |
| <b>Haplotype:</b> The information present in this column relates to one of the 18 different haplotypes evident after the truncation of the full data set.                                                                                                                                                                                                                                                                                                                                                                                                                                                                                                         |        |              |        |        |         |         |          |           |           |         |       |        |          |         |       |      |           |
|                                                                                                                                                                                                                                                                                                                                                                                                                                                                                                                                                                                                                                                                   |        |              |        |        |         |         |          |           |           |         |       |        |          |         |       |      |           |
