# Supplementary material
Source: PubMed Central journal article supplement (PMC2000515)
Supplement: pnas_0703411104_8.pdf [file pnas_0703411104_8.pdf]

| Table 6. A list of dating and status determinations of all sequenced ancient specimens. |        |         |               |            |                            |                     |                           |                                   |                                     |                 |              |                                                                                                                                                                                                                         |               |           |
|-----------------------------------------------------------------------------------------|--------|---------|---------------|------------|----------------------------|---------------------|---------------------------|-----------------------------------|-------------------------------------|-----------------|--------------|-------------------------------------------------------------------------------------------------------------------------------------------------------------------------------------------------------------------------|---------------|-----------|
| Extract                                                                                 | Source | Samp. # | Spec. #       | Country    | Location                   | Site code           | Phase                     | Dating                            | Dating Determination                | Element         | Wild/Dom     | Criteria of Wild/Dom                                                                                                                                                                                                    | Determination | Haplotype |
| <b>NEAR EAST</b>                                                                        |        |         |               |            |                            |                     |                           |                                   |                                     |                 |              |                                                                                                                                                                                                                         |               |           |
| Armenia                                                                                 |        |         |               |            |                            |                     |                           |                                   |                                     |                 |              |                                                                                                                                                                                                                         |               |           |
| GL343                                                                                   | NM2    | 32      | 77            | Armenia    |                            | Khatunarkh          | 5th millennium            | 5th millennium BC uncal?          | stratigraphic/cultural              | lower P4+M1+M2  | wild         | an absolutely enormous specimen, well beyond the size we know of any domestic pig of any time and region; also id based on tooth widths, the most reliable criterion of all for the wild/dom id. M2WA=16mm; M2WP=17,2mm | UA            | ANC-Arm2T |
| GL376                                                                                   | NM2    | 15      | 163           | Armenia    | n/ Yerevan                 | Shengevit           | late 4th-early 3rd millen | late 4th-early 3rd mill BC uncal? | stratigraphic/cultural              | lower P2        | undetermined |                                                                                                                                                                                                                         | UA            | ANC-Arm2T |
| GL932                                                                                   | NM2    | 25      |               | Armenia    | Lake Sevan                 | Sevan               | 2nd millennium BC         | 2nd millennium BC uncal?          | stratigraphic/cultural              | lower P4        | domestic?    | undetermined, but belonging to a cultural context dominated by domestic animals                                                                                                                                         | UA            | ANC-Arm1T |
| GL896                                                                                   | NM2    | 1       | 10            | Armenia    | Lake Sevan                 | Lchashen            | Late Bronze/eary Iron     | 13th-9th cent. BC                 | stratigraphic/cultural              | Lower I         | domestic?    | undetermined, but belonging to a cultural context dominated by domestic animals                                                                                                                                         | UA            | ANC-Arm1T |
| GL187                                                                                   | NM2    | 2       |               | Armenia    | Lake Sevan                 | Lchashen            | Late Bronze/eary Iron     | 13th-9th cent. BC                 | stratigraphic/cultural              | Lower M1        | domestic?    | a small tooth, well below the size expected for wild boar in the region also belonging to a cultural context dominated by domestic animals                                                                              | UA            | ANC-Arm1T |
| GL188                                                                                   | NM2    | 4       | 38            | Armenia    | Lake Sevan                 | Lchashen            | Late Bronze/eary Iron     | 13th-9th cent. BC                 | stratigraphic/cultural              | Lower M1        | domestic?    | a small tooth, well below the size expected for wild boar in the region also belonging to a cultural context dominated by domestic animals                                                                              | UA            | ANC-Arm1T |
| GL891                                                                                   | NM2    | 10      |               | Armenia    | Lake Sevan                 | Lchashen            | Late Bronze/eary Iron     | 13th-9th cent. BC                 | stratigraphic/cultural              | lower I         | undetermined |                                                                                                                                                                                                                         | UA            | ANC-Arm1T |
| GL876                                                                                   | NM2    | 28      |               | Armenia    |                            | Tmbatir             | Late Bronze-early Iron    | 13th-9th cent. BC                 | stratigraphic/cultural              | lower I         | undetermined |                                                                                                                                                                                                                         | UA            | ANC-Arm1T |
| GL881                                                                                   | NM2    | 23      |               | Armenia    |                            | Pilorpat            | 6th-5th cent BC           | 6th-5th cent BC                   | stratigraphic/cultural              | lower dP4       | domestic?    | a small tooth, well below the size expected for wild boar in the region also belonging to a cultural context dominated by domestic animals                                                                              | UA            | ANC-Aside |
| GL861                                                                                   | NM2    | 17      |               | Armenia    |                            | Tmbatir             | 6th-5th cent BC           | 6th-5th cent BC                   | stratigraphic/cultural              | P2+P3           | undetermined |                                                                                                                                                                                                                         | UA            | ANC-Aside |
| GL895                                                                                   | NM2    | 27      |               | Armenia    |                            | Sevkar              | 7th-5th cent BC           | 7th-5th cent BC                   | stratigraphic/cultural              | lower M2        | domestic     | a very small tooth, well below the size expected for wild boar in the region also belonging to a cultural context dominated by domestic animals                                                                         | UA            | ANC-Aside |
| GL812                                                                                   | NM2    | 35      |               | Armenia    |                            | Beniamin            | 1st half 1st mill. AD     | 1st half 1st mill. AD             | stratigraphic/cultural              | Upper M3        | undetermined |                                                                                                                                                                                                                         | UA            | ANC-Aside |
| GL366                                                                                   | NM2    | 37      |               | Armenia    |                            | Tsakaektsi          | 13th cent AD              | 13th cent AD                      | stratigraphic/cultural              | lower M1        | domestic     | a very small tooth, well below the size expected for wild boar in the region also belonging to a cultural context dominated by domestic animals                                                                         | UA            | ANC-Aside |
| GL864                                                                                   | NM2    | 38      |               | Armenia    |                            | Tsakaektsi          | 13th cent AD              | 13th cent AD                      | stratigraphic/cultural              | upper M3        | undetermined |                                                                                                                                                                                                                         | UA            | ANC-Aside |
| Syria                                                                                   |        |         |               |            |                            |                     |                           |                                   |                                     |                 |              |                                                                                                                                                                                                                         |               |           |
| GL484                                                                                   | AM     | 8       | E.224.1       | Syria      | Hassake province, NE Syria | CB00 (Chagar Bazar) |                           | 1st 1/2 2nd mill BC               | stratigraphic/cultural              | Canine (female) | domestic     | a small tooth, well below the size expected for wild boar in the region also belonging to a cultural context dominated by domestic animals                                                                              | KD            | ANC-Arm1T |
| <b>EAST / CENTRAL EUROPE</b>                                                            |        |         |               |            |                            |                     |                           |                                   |                                     |                 |              |                                                                                                                                                                                                                         |               |           |
| Croatia                                                                                 |        |         |               |            |                            |                     |                           |                                   |                                     |                 |              |                                                                                                                                                                                                                         |               |           |
| GL730                                                                                   | PM1    | 5       | Pup 61 (1261) | Croatia    | 15km w of Rijeka           | Pupicina Cave       | Mesolithic                | ~9500 cal BC                      | stratigraphic/cultural              | upper I1        | wild?        | for this study all pre-Neolithic specimens were considered wild                                                                                                                                                         | PM1           | ANC-Italy |
| GL979                                                                                   | PM1    | 2       | Pup59 1250    | Croatia    | 15km w of Rijeka           | Pupicina Cave       | Mesolithic                | 9225-9310 cal BC                  | direct 14C                          | Humerus, distal | wild?        | for this study all pre-Neolithic specimens were considered wild                                                                                                                                                         | PM1           | ANC-Italy |
| GL980                                                                                   | PM1    | 1       | Pup96 229.11  | Croatia    | 15km w of Rijeka           | Pupicina Cave       | Mesolithic                | 8740-9220 cal BC                  | direct 14C                          | Metatarsal 4    | wild?        | for this study all pre-Neolithic specimens were considered wild                                                                                                                                                         | PM1           | ANC-Italy |
| GL726                                                                                   | PM1    | 1       | Pup97 771C.24 | Croatia    | 15km w of Rijeka           | Pupicina Cave       | Mesolithic                | 8500 cal BC                       | stratigraphic/cultural              | lower incisor   | wild?        | for this study all pre-Neolithic specimens were considered wild                                                                                                                                                         | PM1           | ANC-Italy |
| GL728                                                                                   | PM1    | 3       | Pup97 564.37  | Croatia    | 15km w of Rijeka           | Pupicina Cave       | Late Neolithic            | 4300 cal BC                       | stratigraphic/cultural              | upper canine    | domestic?    | context and supported by the DNA haplotype and phylogeography                                                                                                                                                           | PM1           | ANC-Y2-5A |
| GL729                                                                                   | PM1    | 4       | Pup 17 (24)   | Croatia    | 15km w of Rijeka           | Pupicina Cave       | Mid Bronze                | 1500 cal BC                       | stratigraphic/cultural              | astragalus      | domestic?    | context                                                                                                                                                                                                                 | PM1           | ANC-Cside |
| Czech Republic                                                                          |        |         |               |            |                            |                     |                           |                                   |                                     |                 |              |                                                                                                                                                                                                                         |               |           |
| GL30                                                                                    | PM2    | 1       |               | Czech Rep. | Bohemia                    | HOMOLKA             | Eneolithic                | c. 2700-2300 BC                   | stratigraphic/cultural              | fem. lo can     | undetermined |                                                                                                                                                                                                                         | UA            | ANC-Cside |
| GL33                                                                                    | PM2    | 4       |               | Czech Rep. | Bohemia                    | HOMOLKA             | Eneolithic                | c. 2700-2300 BC                   | stratigraphic/cultural              | max M3          | undetermined |                                                                                                                                                                                                                         | UA            | ANC-Aside |
| GL34                                                                                    | PM2    | 5       |               | Czech Rep. | Bohemia                    | HOMOLKA             | Eneolithic                | c. 2700-2300 BC                   | stratigraphic/cultural              | fem. lo can     | undetermined |                                                                                                                                                                                                                         | UA            | ANC-Aside |
| GL36                                                                                    | PM2    | 7       |               | Czech Rep. | Bohemia                    | HOMOLKA             | Eneolithic                | c. 2700-2300 BC                   | stratigraphic/cultural              | mand inc        | undetermined |                                                                                                                                                                                                                         | UA            | ANC-Aside |
| GL37                                                                                    | PM2    | 8       |               | Czech Rep. | Bohemia                    | HOMOLKA             | Eneolithic                | c. 2700-2300 BC                   | stratigraphic/cultural              | mand            | wild         | a huge specimen, well beyond the size we know of any domestic pig of any time and region; M2WA=17.1mm; M2WP=17.4mm                                                                                                      | UA            | ANC-Cside |
| GL38                                                                                    | PM2    | 9       |               | Czech Rep. | Bohemia                    | HOMOLKA             | Eneolithic                | c. 2700-2300 BC                   | stratigraphic/cultural              | mand            | wild?        | a large specimen, v. unlikely to be domestic, but smaller than sample n.8; M2WA=15.3mm; M2WP=16.1mm; M3L=4.13mm                                                                                                         | UA            | ANC-Cside |
| GL41                                                                                    | PM2    | 12      |               | Czech Rep. | Bohemia                    | HOMOLKA             | Eneolithic                | c. 2700-2300 BC                   | stratigraphic/cultural              | calc            | wild?        | a large specimen, v. unlikely to be domestic, as assessment based on a fully fused specimen and a measurement that is not much age dependent and also relative little sex dependent                                     | UA            | ANC-Cside |
| Germany                                                                                 |        |         |               |            |                            |                     |                           |                                   |                                     |                 |              |                                                                                                                                                                                                                         |               |           |
| GL115                                                                                   | NB     | 1       |               | Germany    | Southern Germany           | Allendorf           | Epipalaeo                 | 12,000-10,000 BC                  | stratigraphic/cultural              | lower M1/2      | wild         | for this study all pre-Neolithic specimens were considered wild                                                                                                                                                         | UA            | ANC-Cside |
| GL116                                                                                   | NB     | 2       |               | Germany    | Southern Germany           | Allendorf           | Epipalaeo                 | 12,000-10,000 BC                  | stratigraphic/cultural              | lower P2+P3+P4  | wild         | for this study all pre-Neolithic specimens were considered wild                                                                                                                                                         | UA            | ANC-Cside |
| GL119                                                                                   | SH     | 7       |               | Germany    | North-East Germany         | Friesack            | Mesolithic I/III          | 8,500-7,500 BC cal                | indirect 14C/stratigraphic/cultural | upper incisor   | wild         | for this study all pre-Neolithic specimens were considered wild                                                                                                                                                         | UA            | ANC-Cside |

| Table 6. A list of dating and status determinations of all sequenced ancient specimens |        |        |         |         |                    |                      |                                  |                              |                                     |                 |              |                                                                                                                                                                                                                 |               |           |
|----------------------------------------------------------------------------------------|--------|--------|---------|---------|--------------------|----------------------|----------------------------------|------------------------------|-------------------------------------|-----------------|--------------|-----------------------------------------------------------------------------------------------------------------------------------------------------------------------------------------------------------------|---------------|-----------|
| Extract                                                                                | Source | Samp # | Spec. # | Country | Location           | Site code            | Phase                            | Dating                       | Dating Determination                | Element         | Wild/Dom     | Criteria of Wild/Dom                                                                                                                                                                                            | Determination | Haplotype |
| GL538                                                                                  | SH     | 9      |         | Germany | North-East Germany | Friesack             | Mesolithic II/III                | 8,500-7,500 BC cal           | indirect 14C/stratigraphic/cultural | upper incisor   | wild         | for this study all pre-Neolithic specimens were considered wild                                                                                                                                                 | UA            | ANC-Aside |
| GL120                                                                                  | SH     | 10     |         | Germany | North-East Germany | Friesack             | Mesolithic II/III                | 8,500-7,500 BC cal           | indirect 14C/stratigraphic/cultural | upper incisor   | wild         | for this study all pre-Neolithic specimens were considered wild                                                                                                                                                 | UA            | ANC-Cside |
| GL121                                                                                  | SH     | 12     |         | Germany | North-East Germany | Friesack             | Mesolithic II/III                | 8,500-7,500 BC cal           | indirect 14C/stratigraphic/cultural | upper can fem   | wild         | for this study all pre-Neolithic specimens were considered wild                                                                                                                                                 | UA            | ANC-Cside |
| GL122                                                                                  | SH     | 17     |         | Germany | North-East Germany | Friesack             | Mesolithic II/III                | 8,500-7,500 BC cal           | indirect 14C/stratigraphic/cultural | upper incisor   | wild         | for this study all pre-Neolithic specimens were considered wild                                                                                                                                                 | UA            | ANC-Aside |
| GL123                                                                                  | HJD    | 21     | 76:471b | Germany | North-East Germany | Eilsleben            | LBK                              | 5,500-5,000 BC cal           | stratigraphic/cultural              | lower M3        | wild         | a very large specimen, well beyond the size we know of any domestic pig of any time and region; M3L=46.6mm; M3WA=20.5mm                                                                                         | UA            | ANC-Aside |
| GL541                                                                                  | HJD    | 22     | 76:471b | Germany | North-East Germany | Eilsleben            | LBK                              | 5,500-5,000 BC cal           | stratigraphic/cultural              | lower incisor   | undetermined |                                                                                                                                                                                                                 | UA            | ANC-Cside |
| GL977                                                                                  | HJD    | 24     | 83:828k | Germany | North-East Germany | Eilsleben            | LBK                              | 5,500-5,000 BC cal           | stratigraphic/cultural              | lower incisor   | domestic?    | a difficult tooth attribute to wild/dom, but domestic based upon phylogeography                                                                                                                                 | UA            | ANC-Y1-6A |
| GL972                                                                                  | HJD    | 26     | 85:128u | Germany | North-East Germany | Eilsleben            | LBK                              | 5,500-5,000 BC cal           | stratigraphic/cultural              | upper incisor   | domestic?    | a difficult tooth attribute to wild/dom, but domestic based upon phylogeography                                                                                                                                 | UA            | ANC-Y1-6A |
| GL973                                                                                  | HJD    | 27     | 85:138p | Germany | North-East Germany | Eilsleben            | LBK                              | 5,500-5,000 BC cal           | stratigraphic/cultural              | lower canine fe | domestic?    | a difficult tooth attribute to wild/dom, but domestic based upon phylogeography                                                                                                                                 | UA            | ANC-Y1-6A |
| GL976                                                                                  | HJD    | 28     | 88:485h | Germany | North-East Germany | Eilsleben            | LBK                              | 5,500-5,000 BC cal           | stratigraphic/cultural              | upper P3        | domestic?    | a difficult tooth attribute to wild/dom, but domestic based upon phylogeography                                                                                                                                 | UA            | ANC-Y1-6A |
|                                                                                        |        |        |         |         |                    |                      |                                  |                              |                                     |                 |              |                                                                                                                                                                                                                 |               |           |
|                                                                                        |        |        |         |         |                    |                      |                                  |                              |                                     |                 |              |                                                                                                                                                                                                                 |               |           |
| Hungary                                                                                |        |        |         |         |                    |                      |                                  |                              |                                     |                 |              |                                                                                                                                                                                                                 |               |           |
| GL159                                                                                  | LB     |        |         | Hungary |                    | Aquincum             | Roman                            |                              | stratigraphic/cultural              | mandible        | domestic     | Small specimen with short M3 (GL = 34.5mm), shortened dental row from site where majority of animals were domestic.                                                                                             | KD/LB         | ANC-Aside |
| GL185                                                                                  | LB     |        | BT 122  | Hungary |                    | Bajcsa-Torokvar      |                                  | AD 1578-1661                 | stratigraphic/cultural              | M1              | domestic     | From mandible of small male specimen (M1 GL = 16.8mm) from site where majority of animals were domestic.                                                                                                        | KD/LB         | ANC-Aside |
| GL186                                                                                  | LB     |        | BT 321  | Hungary |                    | Bajcsa-Torokvar      |                                  | AD 1578-1667                 | stratigraphic/cultural              | M2              | domestic     | From mandible of small specimen (M2 GL = 19.9mm; M3 GL=33.7mm) from site where majority of animals were domestic.                                                                                               | KD/LB         | ANC-Aside |
|                                                                                        |        |        |         |         |                    |                      |                                  |                              |                                     |                 |              |                                                                                                                                                                                                                 |               |           |
| Italy                                                                                  |        |        |         |         |                    |                      |                                  |                              |                                     |                 |              |                                                                                                                                                                                                                 |               |           |
| GL1000                                                                                 | AT1    | 49     |         | Italy   | Calabria           | Grotta Madonna       | Mesolithic                       | 7,000-6,500 BC cal           | stratigraphic/cultural              | mand I1 sn      | wild         | for this study all pre-Neolithic specimens were considered wild                                                                                                                                                 | UA            | ANC-Cside |
| GL882                                                                                  | AT1    | 52     |         | Italy   | Calabria           | Grotta Madonna       | Early Neolithic                  | 6,500-5,500 BC cal           | stratigraphic/cultural              | mand premolar   | undetermined |                                                                                                                                                                                                                 | UA            | ANC-Italy |
| GL848                                                                                  | AT1    | 49     |         | Italy   | Calabria           | Grotta Madonna       | Mid Neolithic                    | 5,500-4,500 BC cal           | stratigraphic/cultural              | mand I1         | undetermined |                                                                                                                                                                                                                 | UA            | ANC-Italy |
| GL738                                                                                  | AT1    | 54     |         | Italy   | Calabria           | Grotta Madonna       | Mid Bronze                       | c.1,500 BC cal               | stratigraphic/cultural              | mand I1         | domestic?    | a difficult tooth to measure/identify but deriving from a context dominated by domestic animals                                                                                                                 | UA            | ANC-Aside |
| GL467                                                                                  | AT1    | 84     |         | Italy   | Apulia             | Torre Mordillo 89    | Late Bronze                      | Late 2nd - early 1st mil. BC | stratigraphic/cultural              | upper can fem   | domestic?    | a difficult tooth to measure/identify but deriving from a context dominated by domestic animals                                                                                                                 | UA            | ANC-Aside |
| GL183                                                                                  | AT1    | 86     |         | Italy   | Apulia             | Torre Mordillo 89    | Late Bronze                      | Late 2nd - early 1st mil. BC | stratigraphic/cultural              | upper I1        | domestic?    | a difficult tooth to measure/identify but deriving from a context dominated by domestic animals                                                                                                                 | UA            | ANC-Aside |
| GL184                                                                                  | AT1    | 87     |         | Italy   | Apulia             | Torre Mordillo 87    | Late Bronze                      | Late 2nd - early 1st mil. BC | stratigraphic/cultural              | lower Inc       | domestic?    | a difficult tooth to measure/identify but deriving from a context dominated by domestic animals                                                                                                                 | UA            | ANC-Cside |
| GL857                                                                                  | FM1    | 1      |         | Italy   | North Sardinia     | Santu Antine         | Late Bronze / Saggio Torre D     | c.1400-1200 BC cal           | stratigraphic/cultural              | P3 sup          | dom/feral    | Sardinian wild boar and domestic pigs cannot be distinguished biometrically and morphologically; in any case the so called 'wild boar' are likely to represent domestic animals that became feral in prehistory | UA            | ANC-Cside |
| GL344                                                                                  | FM1    | 4      |         | Italy   | North Sardinia     | Santu Antine         | Late Bronze / Saggio Torre D     | c.1400-1200 BC cal           | stratigraphic/cultural              | P sup           | dom/feral    | Sardinian wild boar and domestic pigs cannot be distinguished biometrically and morphologically; in any case the so called 'wild boar' are likely to represent domestic animals that became feral in prehistory | UA            | ANC-Aside |
| GL338                                                                                  | FM1    | 7      |         | Italy   | North Sardinia     | Santu Antine         | Late Bronze / Saggio Torre D     | c.1400-1200 BC cal           | stratigraphic/cultural              | I1 sup          | dom/feral    | Sardinian wild boar and domestic pigs cannot be distinguished biometrically and morphologically; in any case the so called 'wild boar' are likely to represent domestic animals that became feral in prehistory | UA            | ANC-Aside |
| GL336                                                                                  | OF     | 18     |         | Italy   | Central Sardinia   | Arrubiu              | Late Bronze / Cortile B          | c.1400-1200 BC cal           | stratigraphic/cultural              | I inf           | dom/feral    | Sardinian wild boar and domestic pigs cannot be distinguished biometrically and morphologically; in any case the so called 'wild boar' are likely to represent domestic animals that became feral in prehistory | UA            | ANC-Aside |
| GL884                                                                                  | AT1    | 25     |         | Italy   | Veneto             | Concordia Sagittaria | Late bronze                      | 13th-9th cent. BC            | stratigraphic/cultural              | mand i          | domestic?    | a difficult tooth to measure/identify but deriving from a context dominated by domestic animals                                                                                                                 | UA            | ANC-Cside |
| GL892                                                                                  | OF     | 20     |         | Italy   | Central Sardinia   | Arrubiu              | FinalBronze/Early Iron/Cortile B | c.1200-900 BC cal            | stratigraphic/cultural              | I1 sup          | dom/feral    | Sardinian wild boar and domestic pigs cannot be distinguished biometrically and morphologically; in any case the so called 'wild boar' are likely to represent domestic animals that became feral in prehistory | UA            | ANC-Italy |
| GL885                                                                                  | OF     | 21     |         | Italy   | Central Sardinia   | Arrubiu              | FinalBronze/Early Iron/Cortile B | c.1200-900 BC cal            | stratigraphic/cultural              | I inf           | dom/feral    | Sardinian wild boar and domestic pigs cannot be distinguished biometrically and morphologically; in any case the so called 'wild boar' are likely to represent domestic animals that became feral in prehistory | UA            | ANC-Italy |
| GL871                                                                                  | FM1    | 10     |         | Italy   | North Sardinia     | Sant'Imbenia         |                                  | c.900-600 BC                 | stratigraphic/cultural              | C inf female    | dom/feral    | Sardinian wild boar and domestic pigs cannot be distinguished biometrically and morphologically; in any case the so called 'wild boar' are likely to represent domestic animals that became feral in prehistory | UA            | ANC-Cside |



| Table 6. A list of dating and status determinations of all sequenced ancient specimens |        |        |         |         |             |                                  |                           |        |                                                    |                                      |                                    |                         |               |                                                                                                                                                                        |       |           |
|----------------------------------------------------------------------------------------|--------|--------|---------|---------|-------------|----------------------------------|---------------------------|--------|----------------------------------------------------|--------------------------------------|------------------------------------|-------------------------|---------------|------------------------------------------------------------------------------------------------------------------------------------------------------------------------|-------|-----------|
| Extract                                                                                | Source | Samp # | Spec. # | Country | Location    | Site code                        | Phase                     | Dating | Dating Determination                               | Element                              | Wild/Dom                           | Criteria of Wild/Dom    | Determination | Haplotype                                                                                                                                                              |       |           |
| GL521                                                                                  | AB     |        | 1       | 1023    | Romania     | Ialomița County                  | Bordușani                 |        | Chalcolithic / Gumelnita culture                   | 4500-3950 BC                         | stratigraphic/cultural             | M2                      | domestic      | Moderate sized specimen falling within the size range of domestic pigs from the region (GL=21.1mm), and supported by DNA haplotype                                     | UA/AB | ANC-Y1-6A |
| GL522                                                                                  | AB     |        | 2       | 1       | Romania     | Bacău county                     | Poduri                    |        | Chalcolithic / Cucuteni culture A2                 | 4500-4250 BC cat                     | stratigraphic/cultural             | dp2                     | domestic      | Assumed domestic since vast majority of pig remains from the site fall within domestic size range and supported by DNA haplotype                                       | UA    | ANC-Y1-6A |
| GL523                                                                                  | AB     |        | 3       | 2       | Romania     | Bacău county                     | Poduri                    |        | Chalcolithic / Cucuteni culture A2                 | 4500-4250 BC                         | stratigraphic/cultural             | dp4                     | domestic      | Assumed domestic since vast majority of pig remains from the site fall within domestic size range and supported by DNA haplotype                                       | UA    | ANC-Y1-6A |
| GL688                                                                                  | AB     |        | 4       | 23      | Romania     | Bacău county                     | Poduri 2001               |        | Chalcolithic / Cucuteni culture A2                 | 4500-4250 BC                         | stratigraphic/cultural             | mandible & M2           | wild          | Large robust specimen (M3 GL=41.3mm) outside size range of smaller domestic specimens from the site                                                                    | UA    | ANC-Cside |
| GL566                                                                                  | AD     |        | 5       | 5041    | Romania     | Calarasi Cnty, Island nr Giurgiu | Căscioarele A             |        | Chalcolithic / Gumelnita culture                   | mid 5th - mid 4th millennium BC      | stratigraphic/cultural             | Premolar                | wild          | Very large specimen outside size range of domestic specimens from this region                                                                                          | UA    | ANC-Cside |
| GL567                                                                                  | AD     |        | 6       | 5151    | Romania     | Calarasi Cnty, Island nr Giurgiu | Căscioarele A             |        | Chalcolithic / Gumelnita culture                   | mid 5th - mid 4th millennium BC      | stratigraphic/cultural             | premolar                | wild          | Very large specimen outside size range of domestic specimens from this region                                                                                          | UA    | ANC-Cside |
| GL432                                                                                  | AD     |        | 7       | 5157    | Romania     | Calarasi Cnty, Island nr Giurgiu | Căscioarele A             |        | Chalcolithic / Gumelnita culture                   | mid 5th - mid 4th millennium BC      | stratigraphic/cultural             | incisor                 | domestic      | Small specimen and because vast majority of pig remains from the site fall within domestic size range and supported by DNA haplotype                                   | UA    | ANC-Y1-6A |
| GL568                                                                                  | AD     |        | 8       | 5068    | Romania     | Calarasi Cnty, Island nr Giurgiu | Căscioarele A             |        | Chalcolithic / Gumelnita culture                   | mid 5th - mid 4th millennium BC      | stratigraphic/cultural             | premolar                | domestic      | Small specimen and because vast majority of pig remains from the site fall within domestic size range and supported by DNA haplotype                                   | UA    | ANC-Y1-6A |
| GL576                                                                                  | AD     |        | 10      | 5138    | Romania     | Calarasi Cnty, Island nr Giurgiu | Căscioarele A             |        | Chalcolithic / Gumelnita culture                   | mid 5th - mid 4th millennium BC      | stratigraphic/cultural             | tooth fragment          | domestic      | Small specimen and because vast majority of pig remains from the site fall within domestic size range and supported by DNA haplotype                                   | UA    | ANC-Y1-6A |
| GL688                                                                                  | AD     |        | 11      | 5142    | Romania     | Calarasi Cnty, Island nr Giurgiu | Căscioarele A             |        | Chalcolithic / Gumelnita culture                   | mid 5th - mid 4th millennium BC      | stratigraphic/cultural             | M1                      | domestic      | Small specimen (GL=16.4), vast majority of pig remains from the site fall within domestic size range and supported by DNA haplotype                                    | UA    | ANC-Y1-6A |
| GL575                                                                                  | AD     |        | 12      | 5150    | Romania     | Calarasi Cnty, Island nr Giurgiu | Căscioarele A             |        | Chalcolithic / Gumelnita culture                   | mid 5th - mid 4th millennium BC      | stratigraphic/cultural             | M2                      | wild          | Very large specimen outside size range of domestic specimens from this region                                                                                          | UA    | ANC-Cside |
| GL803                                                                                  | AD     |        | 14      | 5159    | Romania     | Calarasi Cnty, Island nr Giurgiu | Căscioarele A             |        | Chalcolithic / Gumelnita culture                   | mid 5th - mid 4th millennium BC      | stratigraphic/cultural             | M1                      | domestic      | Small specimen (GL=16.5), vast majority of pig remains from the site fall within domestic size range and supported by DNA haplotype                                    | UA    | ANC-Y1-6A |
| GL834                                                                                  | AD     |        | 15      | 5198    | Romania     | Calarasi Cnty, Island nr Giurgiu | Căscioarele A             |        | Chalcolithic / Gumelnita culture                   | mid 5th - mid 4th millennium BC      | stratigraphic/cultural             | dp4                     | domestic      | Small specimen, vast majority of pig remains from the site fall within domestic size range and supported by DNA haplotype                                              | UA    | ANC-Y1-6A |
| GL987                                                                                  |        |        | 4       | 32167   | Romania     | Calarasi Cnty, Island nr Giurgiu | Căscioarele               |        | Chalcolithic / Gumelnita culture                   | mid 5th - mid 4th millennium BC      | stratigraphic/cultural             | mandible                | domestic?     | Assumed domestic on basis of small size of dp4 (GL=18.5mm), vast majority of pig remains from the site fall within domestic size range, and supported by DNA haplotype | UA    | ANC-Y1-6A |
| GL447                                                                                  | AD     |        | 3       | 165     | Romania     | Călărași County                  | Vărăști                   |        | Middle/Late Neo - Eneo / Boian & Gumelnita culture | 5th Millennium BC?                   | stratigraphic/cultural             | incisor                 | undetermined  |                                                                                                                                                                        |       | ANC-Cside |
| GL565                                                                                  | AD     |        | 4       | 98      | Romania     | Călărași County                  | Vărăști                   |        | Middle/Late Neo - Eneo / Boian & Gumelnita culture | 5th Millennium BC?                   | stratigraphic/cultural             | pre-molar               | undetermined  |                                                                                                                                                                        |       | ANC-Y1-6A |
| GL1032                                                                                 | VD     |        | 4       | 14      | Romania     | Ilfov County                     | Popești                   |        | Bronze Age                                         | 3000-1600 BC?                        | stratigraphic/cultural             | mandible                | domestic      | Small specimen (M2 GL=21.2mm) and because vast majority of pig remains from the site fall within domestic size range                                                   | UA    | ANC-Aside |
| GL1030                                                                                 | AB     |        | 2       | 29      | Romania     | Buzău County                     | Cărlomănești 2003, Cpl. 4 |        | Bronze Age / Monteoru culture                      | 3000-1600 BC                         | stratigraphic/cultural             | mandible & M2           | undetermined  | Quite large specimen (male) M3 cusp a width=17.6, heavily worn M2 & M3                                                                                                 | UA    | ANC-Aside |
| GL906                                                                                  | VD     |        | 6       | 1       | Romania     | Ialomița                         | Bucu 2004                 |        | Hallstatt                                          | 1000-800 BC                          | stratigraphic/cultural             | maxilla                 | undetermined  |                                                                                                                                                                        |       | ANC-Aside |
| GL150                                                                                  | VD     |        | 2       | 15      | Romania     | Ialomița County                  | Popești                   |        | Hallstatt                                          | 10th century BC                      | stratigraphic/cultural             | mandible                | domestic      | Small specimen and because vast majority of pig remains from the site fall within domestic size range                                                                  | UA    | ANC-Cside |
| GL1034                                                                                 | VD     |        | 6       | 16      | Romania     | Ilfov County                     | Popești                   |        | Hallstatt C                                        | 900 - 150 BC?                        | stratigraphic/cultural             | M1                      | wild?         | Large M1 (GL=20.7mm)                                                                                                                                                   | UA    | ANC-Aside |
| GL1035                                                                                 | VD     |        | 7       | 17      | Romania     | Ilfov County                     | Popești                   |        | La Tene                                            | 900 - 150 BC?                        | stratigraphic/cultural             | mandible                | domestic      | Small specimen (M3 GL=28.7mm) and because vast majority of pig remains from the site fall within domestic size range                                                   | UA    | ANC-Aside |
| GL1036                                                                                 | AB     |        | 13      | 134     | Romania     | Constanța County                 | Durostorum                |        | Epoque Roman                                       | 300-400 AD                           | stratigraphic/cultural             | mandible                | domestic      | Small specimen and because vast majority of pig remains from the site fall within domestic size range                                                                  | UA    | ANC-Aside |
| GL1037                                                                                 | AB     |        | 14      | 135     | Romania     | Constanța County                 | Durostorum                |        | Epoque Roman                                       | 300-400 AD                           | stratigraphic/cultural             | Mandible                | domestic      | Small specimen (M3 GL=29.4mm) and because vast majority of pig remains from the site fall within domestic size range                                                   | UA    | ANC-Aside |
| Switzerland                                                                            |        |        |         |         |             |                                  |                           |        |                                                    |                                      |                                    |                         |               |                                                                                                                                                                        |       |           |
| GL510                                                                                  | JS     |        | 1       | C08988  | Switzerland | Augusta Raurica                  | Kastelen                  |        | Roman                                              | 0-50 AD                              | stratigraphic/cultural (ceramic)   | Incisor (deciduous)     | domestic      | From very small mandible (juvenile) - vast majority of specimens from this site are small domestic animals                                                             | KD/JS | ANC-Cside |
| GL814                                                                                  | JS     |        | 2       | C08188  | Switzerland | Augusta Raurica                  | Kastelen                  |        | Roman                                              | 275-320 AD                           | stratigraphic/cultural (ceramic)   | Incisor (deciduous)     | domestic      | From very small mandible (juvenile) - vast majority of specimens from this site are small domestic animals                                                             | KD/JS | ANC-Aside |
| GL507                                                                                  | JS     |        | 1       |         | Switzerland | Basel-Gasfabrik                  | Grube 84 (1990-32)        |        | Late Iron Age / La Tene D1                         | late 2nd - early 1st century BC      | stratigraphic/cultural             | Incisor (deciduous)     | domestic      | From very small mandible (juvenile) - vast majority of specimens from this site are small domestic animals                                                             | KD/JS | ANC-Aside |
| GL509                                                                                  | JS     |        | 5       | 21670   | Switzerland | Basel-Gasfabrik                  | Grube 86 (1990-32)        |        | Late Iron Age / La Tene D1                         | late 2nd - early 1st century BC      | stratigraphic/cultural             | Canine                  | domestic      | From small mandible - vast majority of specimens from this site are small domestic animals                                                                             | KD/JS | ANC-Aside |
| ASPiq4                                                                                 | JS     |        | 4       |         | Switzerland | Untervaz-Haselboden              | 2001 (year of excavation) |        | Neolithic / early Horgen culture                   | 2610+/-50BC, 2630+/-50BC;1695+/-45BC | 3 indirect 14C dates/stratigraphic | Mandibula (Angulus)     | domestic      | size without measurements                                                                                                                                              | JS    | ANC-Cside |
| GL1022                                                                                 | JS     |        | 8       |         | Switzerland | Cazis-Petrushögel                | 1981 (year of excavation) |        | Neolithic / late Horgen culture                    | 29th/28th century BC                 | stratigraphic/cultural             | C max. female           | domestic      | size without measurements                                                                                                                                              | JS    | ANC-Cside |
| ASPiq9                                                                                 | JS     |        | 9       |         | Switzerland | Cazis-Petrushögel                | 1981 (year of excavation) |        | Neolithic / late Horgen culture                    | 29th/28th century BC                 | stratigraphic/cultural             | Occipitale, Proc. Styl. | domestic      | size without measurements                                                                                                                                              | JS    | ANC-Aside |
| GL1023                                                                                 | JS     |        | 10      |         | Switzerland | Cazis-Petrushögel                | 1981 (year of excavation) |        | Neolithic / late Horgen culture                    | 29th/28th century BC                 | stratigraphic/cultural             | Radius                  | wild?         | GBp=33.8                                                                                                                                                               | JS    | ANC-Cside |

| Table 6. A list of dating and status determinations of all sequenced ancient specimens |        |        |                 |             |                            |                           |                                 |                           |                                     |                       |          |                                                                                                                                                  |               |           |
|----------------------------------------------------------------------------------------|--------|--------|-----------------|-------------|----------------------------|---------------------------|---------------------------------|---------------------------|-------------------------------------|-----------------------|----------|--------------------------------------------------------------------------------------------------------------------------------------------------|---------------|-----------|
| Extract                                                                                | Source | Samp # | Spec. #         | Country     | Location                   | Site code                 | Phase                           | Dating                    | Dating Determination                | Element               | Wild/Dom | Criteria of Wild/Dom                                                                                                                             | Determination | Haplotype |
| GL1024                                                                                 | JS     | 11     |                 | Switzerland | Untervaz-Haselbodenschenke | 2003 (year of excavation) | Neolithic / Corded Ware culture | 27th - 25th century BC    | stratigraphic/cultural              | Humerus               | wild     | CI=53.5                                                                                                                                          | JS            | ANC-Cside |
| GL1025                                                                                 | JS     | 12     |                 | Switzerland | Untervaz-Haselbodenschenke | 2003 (year of excavation) | Neolithic / Corded Ware culture | 27th - 25th century BC    | stratigraphic/cultural              | Tibia                 | domestic | GB=29.6                                                                                                                                          | JS            | ANC-Aside |
| GL1026                                                                                 | JS     | 14     |                 | Switzerland | Untervaz-Haselbodenschenke | 2003 (year of excavation) | Neolithic / Corded Ware culture | 27th - 25th century BC    | stratigraphic/cultural              | Astragalus            | wild     | GL=(64.9) / GLm=49.7                                                                                                                             | JS            | ANC-Cside |
| ASPIq15                                                                                | JS     | 15     |                 | Switzerland | Untervaz-Haselbodenschenke | 2003 (year of excavation) | Neolithic / Pfn culture         | 38th - 36th century BC    | stratigraphic/cultural              | Cuboid                | wild     | GB=24.3 / GT=34.3                                                                                                                                | JS            | ANC-Cside |
| Ukraine                                                                                |        |        |                 |             |                            |                           |                                 |                           |                                     |                       |          |                                                                                                                                                  |               |           |
| GL128                                                                                  | NB     | 1      |                 | Ukraine     | South Crimea               | Span-Koba                 | Mesolithic                      | 9th-8th mil BC cal        | stratigraphic/cultural              | lower ilk incis       | wild     | for this study all pre-Neolithic specimens were considered wild                                                                                  | UA            | ANC-Y2-5A |
| GL536/808                                                                              | NB     | 5      |                 | Ukraine     | South Crimea               | Shan-Koba                 | Early Neo                       | 7th mill BC cal           | stratigraphic/cultural              | lower M1/2            | wild     | an absolutely enormous specimen, well beyond the size we know of any domestic pig of any time and region. M2WA=16.7mm; M2WP=17.1mm               | UA            | ANC-Y2-5A |
| <b>WEST / NORTH EUROPE</b>                                                             |        |        |                 |             |                            |                           |                                 |                           |                                     |                       |          |                                                                                                                                                  |               |           |
| Belgium                                                                                |        |        |                 |             |                            |                           |                                 |                           |                                     |                       |          |                                                                                                                                                  |               |           |
| GL158                                                                                  | SVP    |        |                 | Belgium     | Falaen, Wallonia           | Montaigle                 | Roman                           | Late 2nd - 5th Century AD | stratigraphic/cultural              | Incisor               | domestic | From small mandible - vast majority of specimens from this site are small domestic animals                                                       | KD/AE         | ANC-Aside |
| GL314                                                                                  | AE     |        | 4000N           | Belgium     | Flanders, nr Oostende      | Oudenburg                 | Late Roman/Early Medieval       | no precise dates          | stratigraphic/cultural              | canine (female)       | domestic | From small mandible - vast majority of specimens from this site are small domestic animals                                                       | KD/AE         | ANC-Aside |
| GL825                                                                                  | AE     |        | 2000D           | Belgium     | Flanders, nr Oostende      | Oudenburg                 | Late Roman/Early Medieval       | no precise dates          | stratigraphic/cultural              | molar Upper M3)       | domestic | Small specimen within the size range of domestic pigs from the period (GL=29.3mm). Also from a site where vast majority of animals are domestics | KD/AE         | ANC-Aside |
| Denmark                                                                                |        |        |                 |             |                            |                           |                                 |                           |                                     |                       |          |                                                                                                                                                  |               |           |
| GL429                                                                                  | KA-S   | 4      | ZMK 119/1971    | Denmark     | E Jutland                  | Flynderhage               | Late Mesolithic                 | 4500-3900 BC              | stratigraphic/cultural              | incisor               | wild     | Large specimens and for this study all pre-Neolithic specimens were considered wild                                                              | PR-C/KD       | ANC-Cside |
| GL306                                                                                  | KA-S   | 9      | ZMK 215/1934    | Denmark     | central Zealand            | Trelleborg                | Early Medieval                  | c. AD 1000                | stratigraphic/cultural              | incisor               | domestic | From small mandible - vast majority of specimens from this site are small domestic animals                                                       | PR-C/KD       | ANC-Aside |
| GL907                                                                                  | KA-S   | 1      | Z.M.K. 119/1971 | Denmark     | E Jutland                  | Flynderhage               | Late Mesolithic                 | 4500-3900 BC              | stratigraphic/cultural              | premolar              | wild     | Large specimens and for this study all pre-Neolithic specimens were considered wild                                                              | PR-C/KD       | ANC-Cside |
| England                                                                                |        |        |                 |             |                            |                           |                                 |                           |                                     |                       |          |                                                                                                                                                  |               |           |
| A212                                                                                   | AC     | P2     | CPC-98-2218     | England     | Derbyshire                 | Carsington Pasture Cave   | Mesolithic                      | 4393 ± 41 cal BC          | direct 14C                          | right mandible        | wild     | a very large specimen and for this study all pre-Neolithic specimens were considered wild                                                        | UA            | ANC-Cside |
| A213                                                                                   | AC     | P3     | CPC-98-2330     | England     | Derbyshire                 | Carsington Pasture Cave   | Mesolithic                      | 5678 ± 30 cal BC          | direct 14C                          | right tibia           | wild     | a very large specimen and for this study all pre-Neolithic specimens were considered wild                                                        | UA            | ANC-Cside |
| A214                                                                                   | AC     | P4     | CPC-98-1109     | England     | Derbyshire                 | Carsington Pasture Cave   | Late Bronze Age                 | 1130 ± 63 cal BC          | direct 14C                          | left humerus          | domestic | clearly small                                                                                                                                    | UA            | ANC-Aside |
| A215                                                                                   | AC     | P5     | CPC-98-2280     | England     | Derbyshire                 | Carsington Pasture Cave   | Late Bronze Age                 | 1158 ± 60 cal BC          | direct 14C                          | left radius           | domestic | clearly small                                                                                                                                    | UA            | ANC-Aside |
| A216                                                                                   | AC     | P6     | CPC-98-2325     | England     | Derbyshire                 | Carsington Pasture Cave   | Early Neolithic                 | 3457 ± 58 cal BC          | direct 14C                          | right scapula         | domestic | clearly small, fusion not visible but it seems to be fully formed                                                                                | UA            | ANC-Aside |
| A217                                                                                   | AC     | P7     | CPC-98-?        | England     | Derbyshire                 | Carsington Pasture Cave   | Late Neolithic                  | 2327 ± 82 cal BC          | direct 14C                          | atlas                 | domestic | a rather large specimen, but within the variation noted for the late Neolithic domestic pigs at Durrington Walls                                 | UA            | ANC-Aside |
| GL524                                                                                  | UA     | 11     |                 | England     | Wiltshire                  | Durrington Walls 04       | Late Neolithic                  | 2800-2400 BC cal          | indirect 14C on associated material | mand frg M3           | domestic | On the basis of very detailed biometrical analysis virtually all pigs from this site have been interpreted to be domestic.                       | UA            | ANC-Aside |
| GL525                                                                                  | UA     | 12     |                 | England     | Wiltshire                  | Durrington Walls 04       | Late Neolithic                  | 2800-2400 BC cal          | indirect 14C on associated material | metatarsal            | domestic | On the basis of very detailed biometrical analysis virtually all pigs from this site have been interpreted to be domestic.                       | UA            | ANC-Aside |
| GL526                                                                                  | UA     | 16     |                 | England     | Wiltshire                  | Durrington Walls 04       | Late Neolithic                  | 2800-2400 BC cal          | indirect 14C on associated material | upper I1              | domestic | On the basis of very detailed biometrical analysis virtually all pigs from this site have been interpreted to be domestic.                       | UA            | ANC-Aside |
| GL527                                                                                  | AH     | 17     |                 | England     | Gloucestershire            | Chedworth Roman villa     | Roman                           | 1st-5th cent AD           | stratigraphic/cultural              | astragalus            | wild     | A very large specimen at a time when domestic pigs were small; it stands out from most of the other specimens from this site                     | UA            | ANC-Aside |
| GL530                                                                                  | UA     | 25     |                 | England     | York                       | Coppergate                | Roman                           | 1st-5th cent AD           | stratigraphic/cultural              | tooth fragment        | domestic | Small specimen within the size range of domestic pigs from the period. Also from a site where vast majority of animals are domestics             | KD            | ANC-Aside |
| GL531                                                                                  | UA     | 27     |                 | England     | York                       | Coppergate                | Roman                           | 1st-5th cent AD           | stratigraphic/cultural              | dp4                   | domestic | Small specimen within the size range of domestic pigs from the period. Also from a site where vast majority of animals are domestics             | KD            | ANC-Aside |
| GL532                                                                                  | UA     | 29     | AB3             | England     | York                       | Swinegate                 | Roman                           | 1st-5th cent AD           | stratigraphic/cultural              | tooth lower premolar  | domestic | Small specimen within the size range of domestic pigs from the period. Also from a site where vast majority of animals are domestics             | KD            | ANC-Aside |
| GL533                                                                                  | UA     | 31     | AB6             | England     | York                       | Swinegate                 | Roman                           | 1st-5th cent AD           | stratigraphic/cultural              | tooth (lower M1/2)    | domestic | Small specimen within the size range of domestic pigs from the period. Also from a site where vast majority of animals are domestics             | KD            | ANC-Aside |
| GL327                                                                                  | UA     | 5      |                 | England     | York                       | Fishergate                | Roman?                          | 1st-5th cent. AD          | stratigraphic/cultural              | tooth canine (female) | domestic | Small specimen within the size range of domestic pigs from the period. Also from a site where vast majority of animals are domestics             | KD            | ANC-Aside |
| GL157                                                                                  | UA     | 6      |                 | England     | York                       | Fishergate                | Roman?                          | 1st-5th cent. AD          | stratigraphic/cultural              | tooth (lower M3)      | domestic | Small specimen within the size range of domestic pigs from the period (GL=31.4mm). Also from a site where vast majority of animals are domestics | KD            | ANC-Aside |
| GL528                                                                                  | AH     | 19     | 22780           | England     | Shropshire                 | Wroxeter                  | 6th-7th cent AD                 | 6th-7th cent AD           | stratigraphic/cultural              | 3rd metatarsal        | wild     | A very large specimen at a time when domestic pigs were small; it stands out from most of the other specimens from this site                     | UA            | ANC-Cside |



| Table 6. A list of dating and status determinations of all sequenced ancient specimens. |           |        |                                  |             |                             |                  |                           |                     |                        |               |              |                                                                                                                                                                                                                                                                                                                                                                                    |               |           |  |
|-----------------------------------------------------------------------------------------|-----------|--------|----------------------------------|-------------|-----------------------------|------------------|---------------------------|---------------------|------------------------|---------------|--------------|------------------------------------------------------------------------------------------------------------------------------------------------------------------------------------------------------------------------------------------------------------------------------------------------------------------------------------------------------------------------------------|---------------|-----------|--|
| Extract                                                                                 | Source    | Samp # | Spec. #                          | Country     | Location                    | Site code        | Phase                     | Dating              | Dating Determination   | Element       | Wild/Dom     | Criteria of Wild/Dom                                                                                                                                                                                                                                                                                                                                                               | Determination | Haplotype |  |
| GL341                                                                                   | TM        |        | 2                                | Iceland     | North-East Iceland          | Hofstadir        | 10th cent AD              | 10th cent AD        | stratigraphic/cultural | ulna          | domestic     | no native wild boar in Iceland                                                                                                                                                                                                                                                                                                                                                     | UA            | ANC-Aside |  |
| GL361                                                                                   | TM        |        | 4                                | Iceland     |                             | Hrisheimar       | Early med/Viking          | 9th-12th cent. AD   | stratigraphic/cultural | ulna          | domestic     | no native wild boar in Iceland                                                                                                                                                                                                                                                                                                                                                     | UA            | ANC-Aside |  |
| Ireland                                                                                 |           |        |                                  |             |                             |                  |                           |                     |                        |               |              |                                                                                                                                                                                                                                                                                                                                                                                    |               |           |  |
| A244                                                                                    | FM2       | WB 07  | MC98 F1604                       | Ireland     | County Meath                | Movnagh Crannon  |                           | 3888 ± 60 cal BC    | direct 14C             | patella       | undetermined |                                                                                                                                                                                                                                                                                                                                                                                    |               | ANC-Aside |  |
| A352                                                                                    | NM1       | WB 08  | NM1NG: F21156; reference LNG/169 | Ireland     | County Waterford            | Kilgreany        |                           | 7358 ± 138 cal BC   | direct 14C             | metapodial    | wild         | for this study all pre-Neolithic specimens were considered wild                                                                                                                                                                                                                                                                                                                    | UA            | ANC-Cside |  |
| GL442                                                                                   | LVW-B     |        | 2 155/2                          | Ireland     | County Meath                | Newgrange        | Neolithic                 | 3000 BC?            | stratigraphic/cultural | Incisor       | domestic?    | not a measurable element but animals on this site are virtually all domestic (similar site and situation as Durrington Walls, see above)                                                                                                                                                                                                                                           | UA            | ANC-Aside |  |
| Netherlands                                                                             |           |        |                                  |             |                             |                  |                           |                     |                        |               |              |                                                                                                                                                                                                                                                                                                                                                                                    |               |           |  |
| GL877                                                                                   | RL        |        | 29 910185                        | Netherlands | Flevoland                   | Swifterbant - S3 | Mid Neolithic             | 4100-3400 BC cal    | stratigraphic/cultural | upper incisor | domestic?    | a difficult tooth to measure/identify but deriving from a context dominated by domestic species                                                                                                                                                                                                                                                                                    | UA            | ANC-Aside |  |
| GL371                                                                                   | RL        |        | 41 147/1                         | Netherlands | Gelderland                  | Nijmegen Canabae | 70-120 AD                 | 70-120 AD           | stratigraphic/cultural | lower incisor | domestic?    | a difficult tooth to measure/identify but deriving from a context dominated by domestic species                                                                                                                                                                                                                                                                                    | UA            | ANC-Aside |  |
| GL160                                                                                   | RL        |        |                                  | Netherlands | Gelderland                  | Nijmegen         | Roman 0-70 AD             | 0-70 AD             | stratigraphic/cultural | jaw fragment  | domestic?    | a difficult tooth to measure/identify but deriving from a context dominated by domestic species                                                                                                                                                                                                                                                                                    | UA            | ANC-Aside |  |
| GL806                                                                                   | RL        |        |                                  | Netherlands | Gelderland                  | Nijmegen         | Roman 0-70 AD             | 0-70 AD             | stratigraphic/cultural | jaw fragment  | domestic?    | a difficult tooth to measure/identify but deriving from a context dominated by domestic species                                                                                                                                                                                                                                                                                    | UA            | ANC-Cside |  |
| GL208                                                                                   | KP/DM/JG1 |        | NS16                             | Netherlands | Brown bank/ridge, North Sea | Southern Bight   |                           |                     |                        | humerus       | undetermined |                                                                                                                                                                                                                                                                                                                                                                                    |               | ANC-Cside |  |
| GL209                                                                                   | KP/DM/JG1 |        | NS15                             | Netherlands | Brown bank/ridge, North Sea | Southern Bight   |                           |                     |                        | radius        | undetermined |                                                                                                                                                                                                                                                                                                                                                                                    |               | ANC-Cside |  |
| GL210                                                                                   | KP/DM/JG1 | JG202  | NS12                             | Netherlands | 52.53.862N 002.53.471E      | Southern Bight   |                           | 8435-8645 cal BC    | direct 14C             | metacarpal    | wild?        | for this study all pre-Neolithic specimens were considered wild                                                                                                                                                                                                                                                                                                                    | UA            | ANC-Cside |  |
| GL211                                                                                   | KP/DM/JG1 |        | NS13                             | Netherlands | Brown bank/ridge, North Sea | Southern Bight   |                           | 8415-8617 cal BC    | direct 14C             | tibia         | wild?        | for this study all pre-Neolithic specimens were considered wild                                                                                                                                                                                                                                                                                                                    | UA            | ANC-Cside |  |
| GL212                                                                                   | KP/DM/JG1 |        | NS14                             | Netherlands | Brown bank/ridge, North Sea | Southern Bight   |                           | 4262-4349 cal BC    | direct 14C             | tibia         | undetermined |                                                                                                                                                                                                                                                                                                                                                                                    |               | ANC-Cside |  |
| GL515                                                                                   | KP/DM/JG1 |        | NS37                             | Netherlands | Brown bank/ridge, North Sea | Southern Bight   |                           |                     |                        | tibia         | undetermined |                                                                                                                                                                                                                                                                                                                                                                                    |               | ANC-Cside |  |
| GL516                                                                                   | KP/DM/JG1 |        | NS38                             | Netherlands | Brown bank/ridge, North Sea | Southern Bight   |                           |                     |                        | tibia         | undetermined |                                                                                                                                                                                                                                                                                                                                                                                    |               | ANC-Cside |  |
| GL544                                                                                   | KP/DM/JG1 |        | NS42                             | Netherlands | Brown bank/ridge, North Sea | Southern Bight   |                           |                     |                        | humerus       | undetermined |                                                                                                                                                                                                                                                                                                                                                                                    |               | ANC-Cside |  |
| Portugal                                                                                |           |        |                                  |             |                             |                  |                           |                     |                        |               |              |                                                                                                                                                                                                                                                                                                                                                                                    |               |           |  |
| GL454                                                                                   | SD        |        | 1                                | Portugal    | Estremadura                 | Zambujal         | Chalcolithic/Early Bronze | 2,600-1,800 BC cal? | stratigraphic/cultural | lower I3      | wild?        | not a measurable specimen, but a large, detailed biometrical analysis carried out at this site showed that it is characterised by the typical 'peak and tail' distribution, with a minority of wild specimens, which are not completely separated from the domestic specimens. nevertheless very small and large specimens must belong respectively to the domestic and wild forms | UA            | ANC-Cside |  |
| GL840                                                                                   | SD        |        | 2                                | Portugal    | Estremadura                 | Zambujal         | Chalcolithic/Early Bronze | 2,600-1,800 BC cal? | stratigraphic/cultural | lower I3      | domestic?    | not a measurable specimen, but a large, detailed biometrical analysis carried out at this site showed that it is characterised by the typical 'peak and tail' distribution, with a minority of wild specimens, which are not completely separated from the domestic specimens. nevertheless very small and large specimens must belong respectively to the domestic and wild forms | UA            | ANC-Cside |  |
| GL333                                                                                   | SD        |        | 14                               | Portugal    | Estremadura                 | Zambujal         | Chalcolithic/Early Bronze | 2,600-1,800 BC cal? | stratigraphic/cultural | lower M3      | wild?        | a very large specimen but incomplete therefore the question mark                                                                                                                                                                                                                                                                                                                   | UA            | ANC-Cside |  |
| GL465                                                                                   | SD        |        | 27                               | Portugal    | Estremadura                 | Zambujal         | Chalcolithic/Early Bronze | 2,600-1,800 BC cal? | stratigraphic/cultural | upper can fem | domestic?    | not a measurable specimen, but a large, detailed biometrical analysis carried out at this site showed that it is characterised by the typical 'peak and tail' distribution, with a minority of wild specimens, which are not completely separated from the domestic specimens. nevertheless very small and large specimens must belong respectively to the domestic and wild forms | UA            | ANC-Cside |  |
| GL805                                                                                   | SD        |        | 28                               | Portugal    | Estremadura                 | Zambujal         | Chalcolithic/Early Bronze | 2,600-1,800 BC cal? | stratigraphic/cultural | upper can fem | domestic?    | not a measurable specimen, but a large, detailed biometrical analysis carried out at this site showed that it is characterised by the typical 'peak and tail' distribution, with a minority of wild specimens, which are not completely separated from the domestic specimens. nevertheless very small and large specimens must belong respectively to the domestic and wild forms | UA            | ANC-Cside |  |
| Scotland                                                                                |           |        |                                  |             |                             |                  |                           |                     |                        |               |              |                                                                                                                                                                                                                                                                                                                                                                                    |               |           |  |

| Table 6. A list of dating and status determinations of all sequenced ancient specimens.                                                                                                                                                                                                                                                                                                                                                                                                                                                     |             |         |         |               |              |                         |                                        |                  |                        |                 |              |                                                                                                                |               |           |  |
|---------------------------------------------------------------------------------------------------------------------------------------------------------------------------------------------------------------------------------------------------------------------------------------------------------------------------------------------------------------------------------------------------------------------------------------------------------------------------------------------------------------------------------------------|-------------|---------|---------|---------------|--------------|-------------------------|----------------------------------------|------------------|------------------------|-----------------|--------------|----------------------------------------------------------------------------------------------------------------|---------------|-----------|--|
| Extract                                                                                                                                                                                                                                                                                                                                                                                                                                                                                                                                     | Source      | Samp. # | Spec. # | Country       | Location     | Site code               | Phase                                  | Dating           | Dating Determination   | Element         | Wild/Dom     | Criteria of Wild/Dom                                                                                           | Determination | Haplotype |  |
| GL457                                                                                                                                                                                                                                                                                                                                                                                                                                                                                                                                       | CHamberlain | 1       | 1       | Scotland      | Isle of Skye | High Pasture Cave       | from Age                               | 350-100BC        | stratigraphic/cultural | incisor         | domestic     | Small mandible and likely no native wild boar present on this island                                           | PR-C          | ANC-Aside |  |
| GL330                                                                                                                                                                                                                                                                                                                                                                                                                                                                                                                                       | TM          | 1       | 1       | Faroe Islands |              | Junkavins Fløtt, Sandur | c.AD1100                               | c.AD1100         | stratigraphic/cultural | ulna            | domestic     | no native wild boar present in these islands                                                                   | UA            | ANC-Aside |  |
| Sweden                                                                                                                                                                                                                                                                                                                                                                                                                                                                                                                                      |             |         |         |               |              |                         |                                        |                  |                        |                 |              |                                                                                                                |               |           |  |
| GL453                                                                                                                                                                                                                                                                                                                                                                                                                                                                                                                                       | GB/IO       | 2       | 2       | Sweden        | Gotland      | Ajvide                  | Middle Neolithic / Pitted Ware culture | 2800-2500 cal BC |                        | canine (female) | undetermined | Major debate over whether introduced Sus on Gotland are wild, domestic or feral.                               | KD/PR-C       | ANC-Aside |  |
| GL488                                                                                                                                                                                                                                                                                                                                                                                                                                                                                                                                       | GB/IO       | 4       | 4       | Sweden        | Gotland      | Ajvide                  | Middle Neolithic / Pitted Ware culture | 2800-2500 cal BC | indirect 14C           | canine (female) | undetermined | Major debate over whether introduced Sus on Gotland are wild, domestic or feral.                               | KD/PR-C       | ANC-Aside |  |
| GL474                                                                                                                                                                                                                                                                                                                                                                                                                                                                                                                                       | GB/IO       | 5       | 5       | Sweden        | Gotland      | Ajvide                  | Middle Neolithic / Pitted Ware culture | 2800-2500 cal BC | indirect 14C           | Lower M3        | undetermined | Large specimen (GL = 47.6mm). Major debate over whether introduced Sus on Gotland are wild, domestic or feral. | KD/PR-C       | ANC-Aside |  |
| GL459                                                                                                                                                                                                                                                                                                                                                                                                                                                                                                                                       | GB/IO       | 6       | 6       | Sweden        | Gotland      | Ajvide                  | Middle Neolithic / Pitted Ware culture | 2800-2500 cal BC | indirect 14C           | Incisor         | undetermined | Major debate over whether introduced Sus on Gotland are wild, domestic or feral.                               | KD/PR-C       | ANC-Aside |  |
| GL316                                                                                                                                                                                                                                                                                                                                                                                                                                                                                                                                       | GB/IO       | 7       | 7       | Sweden        | Gotland      | Ajvide                  | Middle Neolithic / Pitted Ware culture | 2800-2500 cal BC | indirect 14C           | canine (female) | undetermined | Major debate over whether introduced Sus on Gotland are wild, domestic or feral.                               | KD/PR-C       | ANC-Aside |  |
| Extraction #: The code given to each individual                                                                                                                                                                                                                                                                                                                                                                                                                                                                                             |             |         |         |               |              |                         |                                        |                  |                        |                 |              |                                                                                                                |               |           |  |
| Source: The codes for the museums and individuals from which material was generously provided are as follows:                                                                                                                                                                                                                                                                                                                                                                                                                               |             |         |         |               |              |                         |                                        |                  |                        |                 |              |                                                                                                                |               |           |  |
| AB: Adrian Bălăşescu, National History Museum of Romania, National Center of Interdisciplinary Research, 12 Calea Victoriei, 30026 Bucharest, Romania                                                                                                                                                                                                                                                                                                                                                                                       |             |         |         |               |              |                         |                                        |                  |                        |                 |              |                                                                                                                |               |           |  |
| AC: Andrew Chamberlain, Department of Archaeology, University of Cambridge, Northgate House, West Street, Sheffield S1 4ET, United Kingdom                                                                                                                                                                                                                                                                                                                                                                                                  |             |         |         |               |              |                         |                                        |                  |                        |                 |              |                                                                                                                |               |           |  |
| AD: Alexandru Dima, UW Madison, Anthropology Department, 1180 Observatory Drive, 5240 Social Science Building, Madison, WI, 53706                                                                                                                                                                                                                                                                                                                                                                                                           |             |         |         |               |              |                         |                                        |                  |                        |                 |              |                                                                                                                |               |           |  |
| AE: Anton Ervcken, Flemish Heritage Institute, Konink Albert II-laan 19, box 5, B-1210 Brussels, Belgium                                                                                                                                                                                                                                                                                                                                                                                                                                    |             |         |         |               |              |                         |                                        |                  |                        |                 |              |                                                                                                                |               |           |  |
| AF: Andy Hammon, English Heritage, 37 Tanner Row, York YO1 6WP, UK                                                                                                                                                                                                                                                                                                                                                                                                                                                                          |             |         |         |               |              |                         |                                        |                  |                        |                 |              |                                                                                                                |               |           |  |
| AM: Augusta McMahon, Faculty of Oriental Studies and Archaeology and Anthropology, University of Cambridge, Sideway Avenue, Cambridge CB3 9DA, UK, RM 208, Sideway Avenue, Cambridge CB3 9DA, UK                                                                                                                                                                                                                                                                                                                                            |             |         |         |               |              |                         |                                        |                  |                        |                 |              |                                                                                                                |               |           |  |
| AT1: Antonio Tagliacozzo, Soprintendenza Speciale al Museo Nazionale Preistorico Etnografico L. Pigorini, Sezione di Paleontologia del Quaternario e Archeozoologia, Piazzale G. Marconi 14, 00144 Roma, Italy                                                                                                                                                                                                                                                                                                                              |             |         |         |               |              |                         |                                        |                  |                        |                 |              |                                                                                                                |               |           |  |
| AT2: Anne Tresselt, CNRS - Muséum national d'Histoire naturelle, Dept Ecology and Biodiversity Management, USM 303, Case postale 56, 57 rue Cuvier, F-75231 Paris cedex 05, France                                                                                                                                                                                                                                                                                                                                                          |             |         |         |               |              |                         |                                        |                  |                        |                 |              |                                                                                                                |               |           |  |
| CC: Chiara Cavallo, Amsterdams Archeologisch Centrum (AAC) / University of Amsterdam Nwe Prinsengracht 130, 1018 VZ Amsterdam, the Netherlands                                                                                                                                                                                                                                                                                                                                                                                              |             |         |         |               |              |                         |                                        |                  |                        |                 |              |                                                                                                                |               |           |  |
| CD: Cláudia Detry, R. Prof. Alfredo de Sousa nº 8-4B, 1600-1800 Lisboa, Portugal                                                                                                                                                                                                                                                                                                                                                                                                                                                            |             |         |         |               |              |                         |                                        |                  |                        |                 |              |                                                                                                                |               |           |  |
| CM1: Caroline Malone, Department of Archaeology, University of Cambridge, Downing Street, Cambridge CB2 3DZ, UK                                                                                                                                                                                                                                                                                                                                                                                                                             |             |         |         |               |              |                         |                                        |                  |                        |                 |              |                                                                                                                |               |           |  |
| CM2: Claudia Miriti, Laboratorio di Archeozoologia, Soprintendenza Archeologica di Roma, Palazzo Altemps, v. S. Apollinare, 8 - 00186 ROMA, Italy                                                                                                                                                                                                                                                                                                                                                                                           |             |         |         |               |              |                         |                                        |                  |                        |                 |              |                                                                                                                |               |           |  |
| DH: Daniel Helmer, UMR 5133 Archoorient, Maison de l'Orient et de la Méditerranée, Antenne de Jalès, F-07460 Berrias, France                                                                                                                                                                                                                                                                                                                                                                                                                |             |         |         |               |              |                         |                                        |                  |                        |                 |              |                                                                                                                |               |           |  |
| DK: Derek Kennet, Department of Archaeology, University of Durham, South Road, Durham DH1 3L                                                                                                                                                                                                                                                                                                                                                                                                                                                |             |         |         |               |              |                         |                                        |                  |                        |                 |              |                                                                                                                |               |           |  |
| DM: Dick Mol, Natural History Museum, Rotterdam, Westzeedijk 345, NL-3015 AA Rotterdam The Netherlands                                                                                                                                                                                                                                                                                                                                                                                                                                      |             |         |         |               |              |                         |                                        |                  |                        |                 |              |                                                                                                                |               |           |  |
| FH: Fraser Hunter, Department of Archaeology, National Museums of Scotland, Queen's Street, Edinburgh EH2 1JD, Scotland                                                                                                                                                                                                                                                                                                                                                                                                                     |             |         |         |               |              |                         |                                        |                  |                        |                 |              |                                                                                                                |               |           |  |
| FM1: Filippo Manconi, Via Daniele Manin 25, Tempio Pausania (SS) 07029, Italy                                                                                                                                                                                                                                                                                                                                                                                                                                                               |             |         |         |               |              |                         |                                        |                  |                        |                 |              |                                                                                                                |               |           |  |
| FM2: Finbar McCormick, School of Archaeology and Palaeoecology, Queen's University Belfast, Belfast BT7 1NN, UK                                                                                                                                                                                                                                                                                                                                                                                                                             |             |         |         |               |              |                         |                                        |                  |                        |                 |              |                                                                                                                |               |           |  |
| FM3: Field Museum of Natural History, Division of Mammals, 1400 S Lake Shore Drive, Chicago, Illinois 60605 (Bill Stanley)                                                                                                                                                                                                                                                                                                                                                                                                                  |             |         |         |               |              |                         |                                        |                  |                        |                 |              |                                                                                                                |               |           |  |
| GB: Göran Burenhult, Gotland University College, Cramérsgatan 3, 62157 Visby, Sweden                                                                                                                                                                                                                                                                                                                                                                                                                                                        |             |         |         |               |              |                         |                                        |                  |                        |                 |              |                                                                                                                |               |           |  |
| HH: Hitomi Hongo, Advanced Science Graduate University for Advanced Studies, Shonan Village, Hayama, Miura, Kanagawa, 240-0193, Japan                                                                                                                                                                                                                                                                                                                                                                                                       |             |         |         |               |              |                         |                                        |                  |                        |                 |              |                                                                                                                |               |           |  |
| HJD: Hans-Jürgen Döble, Landesamt für Archäologie, Sachsen-Anhalt-Landesmuseum für Vorgeschichte, Richard Wagner Strasse 9-10, 06114 Halle (Saale), Germany                                                                                                                                                                                                                                                                                                                                                                                 |             |         |         |               |              |                         |                                        |                  |                        |                 |              |                                                                                                                |               |           |  |
| IO: Inger Österholm, Gotland University College, Cramérsgatan 3, 62157 Visby, Sweden                                                                                                                                                                                                                                                                                                                                                                                                                                                        |             |         |         |               |              |                         |                                        |                  |                        |                 |              |                                                                                                                |               |           |  |
| J-DV: Jean-Denis Vigne, CNRS, Muséum National d'Histoire Naturelle, UMR 5197, Dpt Ecologie et Gestion de la Biodiversité, Bat. 56, 57 rue Cuvier, F-75231, Paris cedex 05, France                                                                                                                                                                                                                                                                                                                                                           |             |         |         |               |              |                         |                                        |                  |                        |                 |              |                                                                                                                |               |           |  |
| JG1: Jan Glimmerveen, Anna Paulownastraat 25A, 2518 BA Den Haag, The Netherlands                                                                                                                                                                                                                                                                                                                                                                                                                                                            |             |         |         |               |              |                         |                                        |                  |                        |                 |              |                                                                                                                |               |           |  |
| JG2: Jacopo de Grossi Mazzorin, Università di Lecce, Dipartimento di Beni Culturali, Via D. Birago, 64, 73100 Lecce, Italy                                                                                                                                                                                                                                                                                                                                                                                                                  |             |         |         |               |              |                         |                                        |                  |                        |                 |              |                                                                                                                |               |           |  |
| JL: T. Justin Lev-Tov, Hackenheimerstr. 43, 55545 Bad Kreuznach, Germany                                                                                                                                                                                                                                                                                                                                                                                                                                                                    |             |         |         |               |              |                         |                                        |                  |                        |                 |              |                                                                                                                |               |           |  |
| JS: Jörg Schibler, Institute of Prehistory and Archaeological Science (IPAS), Universität, Switzerland, BONES searched from the archaeological Services from cantons Graubünden, Zürich, Bern, Basel-Stadt and Basel-Landschaft                                                                                                                                                                                                                                                                                                             |             |         |         |               |              |                         |                                        |                  |                        |                 |              |                                                                                                                |               |           |  |
| KAS: Kim Aaris-Sørensen, Zoological Museum, Vertebrate Department, Universitetstræken 15, DK-2100 Copenhagen Ø, Denmark                                                                                                                                                                                                                                                                                                                                                                                                                     |             |         |         |               |              |                         |                                        |                  |                        |                 |              |                                                                                                                |               |           |  |
| K-P: Klaas Post, Natuurmuseum Rotterdam, Rotterdam, The Netherlands                                                                                                                                                                                                                                                                                                                                                                                                                                                                         |             |         |         |               |              |                         |                                        |                  |                        |                 |              |                                                                                                                |               |           |  |
| KS: Ken Steadman, Humbler Archaeology Partnership, The Old School, Northumberland Avenue, Hull, HU12 0LN                                                                                                                                                                                                                                                                                                                                                                                                                                    |             |         |         |               |              |                         |                                        |                  |                        |                 |              |                                                                                                                |               |           |  |
| LB: László Bartosiewicz, Institute of Archaeological Sciences, Eötvös Lorand University, Budapest, Hungary                                                                                                                                                                                                                                                                                                                                                                                                                                  |             |         |         |               |              |                         |                                        |                  |                        |                 |              |                                                                                                                |               |           |  |
| LKH: Liora Kolska Horwitz, Department of Evolution, Systematics and Ecology, The Hebrew University, Berman Building, Givat Ram, Jerusalem, Israel                                                                                                                                                                                                                                                                                                                                                                                           |             |         |         |               |              |                         |                                        |                  |                        |                 |              |                                                                                                                |               |           |  |
| LVW-B: Louise Van Wijnngaarden-Bakker, Amsterdam Archaeological Center, University of Amsterdam, Turfdraaistraat 9, 1012 XT Amsterdam, the Netherlands                                                                                                                                                                                                                                                                                                                                                                                      |             |         |         |               |              |                         |                                        |                  |                        |                 |              |                                                                                                                |               |           |  |
| MM1: Marco Masseti, Dipartimento di Biologia Animale e Genetica "Leo Pardi" dell'Università di Firenze, Laboratori di Antropologia, Firenze, Italy                                                                                                                                                                                                                                                                                                                                                                                          |             |         |         |               |              |                         |                                        |                  |                        |                 |              |                                                                                                                |               |           |  |
| MM2: Marian Mashkour, CNRS - Muséum national d'Histoire naturelle, Dept Ecology and Biodiversity Management, USM 303, Case postale 56, 57 rue Cuvier, F-75231 Paris cedex 05, France                                                                                                                                                                                                                                                                                                                                                        |             |         |         |               |              |                         |                                        |                  |                        |                 |              |                                                                                                                |               |           |  |
| NB: Norbert Benecke, Deutsches Archäologisches Institut, Referat Naturwissenschaftlichen, Im Dol 2-6, Insel 2, 14195 Berlin, Germany                                                                                                                                                                                                                                                                                                                                                                                                        |             |         |         |               |              |                         |                                        |                  |                        |                 |              |                                                                                                                |               |           |  |
| NM1: Niina Monaghan, National History Division, National Museum of Ireland, Merrion Street, Dublin 2, Ireland                                                                                                                                                                                                                                                                                                                                                                                                                               |             |         |         |               |              |                         |                                        |                  |                        |                 |              |                                                                                                                |               |           |  |
| NM2: Nirmal Manasyan, Institute of Zoology, The National Academy of Sciences of Armenia, 7, Sevag str., Yerevan 375014, Armenia                                                                                                                                                                                                                                                                                                                                                                                                             |             |         |         |               |              |                         |                                        |                  |                        |                 |              |                                                                                                                |               |           |  |
| OF: Ornella Fonzo, Via Lai 2, 09128 Cagliari, Italy                                                                                                                                                                                                                                                                                                                                                                                                                                                                                         |             |         |         |               |              |                         |                                        |                  |                        |                 |              |                                                                                                                |               |           |  |
| PH: Paul Halstead, Department of Archaeology, University of Sheffield, Northgate House, West Street, Sheffield S1 4ET, UK                                                                                                                                                                                                                                                                                                                                                                                                                   |             |         |         |               |              |                         |                                        |                  |                        |                 |              |                                                                                                                |               |           |  |
| PM1: Preston Miracle, Department of Archaeology, University of Cambridge, Downing Street, Cambridge CB2 3DZ, UK                                                                                                                                                                                                                                                                                                                                                                                                                             |             |         |         |               |              |                         |                                        |                  |                        |                 |              |                                                                                                                |               |           |  |
| PM2: Peabody Museum of Archaeology and Ethnology, 11 Divinity Ave, Cambridge, MA 02138, USA                                                                                                                                                                                                                                                                                                                                                                                                                                                 |             |         |         |               |              |                         |                                        |                  |                        |                 |              |                                                                                                                |               |           |  |
| RB: Rolf Rühlig, Institute for Anthropology, Kolonel-Kleinmann Weg 2, 55128 Mainz, Germany                                                                                                                                                                                                                                                                                                                                                                                                                                                  |             |         |         |               |              |                         |                                        |                  |                        |                 |              |                                                                                                                |               |           |  |
| RL: Ruth Lauwerier, National Service for Archaeology, Cultural Landscape and Built Heritage (RACM), Kerkerstraat 1, NL-3811 CV Amersfoort, the Netherlands                                                                                                                                                                                                                                                                                                                                                                                  |             |         |         |               |              |                         |                                        |                  |                        |                 |              |                                                                                                                |               |           |  |
| RM1: Roger Mathews, Institute of Archaeology, University College London, 31-34 Gordon Square, London WC1H 0PY, UK                                                                                                                                                                                                                                                                                                                                                                                                                           |             |         |         |               |              |                         |                                        |                  |                        |                 |              |                                                                                                                |               |           |  |
| RM2: Zsuzsanna Csécsényi, Laboratory of Anthropology, Peabody Museum of Archaeology and Ethnology, 11 Divinity Ave, Cambridge, MA 02138, USA                                                                                                                                                                                                                                                                                                                                                                                                |             |         |         |               |              |                         |                                        |                  |                        |                 |              |                                                                                                                |               |           |  |
| RP: Richard Redding, Museum of Anthropology, 1109 Geddes Avenue, Ann Arbor, Michigan, 48106-1079, USA                                                                                                                                                                                                                                                                                                                                                                                                                                       |             |         |         |               |              |                         |                                        |                  |                        |                 |              |                                                                                                                |               |           |  |
| SD: Simon Davis, Instituto Português de Arqueologia, Avenida da Índia 136, P-1300, Lisbon, Portugal                                                                                                                                                                                                                                                                                                                                                                                                                                         |             |         |         |               |              |                         |                                        |                  |                        |                 |              |                                                                                                                |               |           |  |
| SH: Susanne Hanik, Brandenburgisches Landesamt für Denkmalpflege und Archäologisches Landesmuseum, Wundsdorfer Platz 4 – 5, D - 15838 Zossen (Ortsteil Wundsdorf), Germany                                                                                                                                                                                                                                                                                                                                                                  |             |         |         |               |              |                         |                                        |                  |                        |                 |              |                                                                                                                |               |           |  |
| SS: Simon Stoddart, Magdalene College, University of Cambridge, CB3 0AG, UK                                                                                                                                                                                                                                                                                                                                                                                                                                                                 |             |         |         |               |              |                         |                                        |                  |                        |                 |              |                                                                                                                |               |           |  |
| SVP: Sophie Van Poucke, Koninklijk Belgisch Instituut voor Natuurwetenschappen, Afdeling Antropologie en Prehistorie, Vautierstraat 29, 1000 Brussel, Belgium                                                                                                                                                                                                                                                                                                                                                                               |             |         |         |               |              |                         |                                        |                  |                        |                 |              |                                                                                                                |               |           |  |
| TC: Thomas Cucchi, Muséum national Histoire Naturelle, UMR 5197, Case Postale 55, 57 rue Cuvier, F-75231 Paris cedex 05, France                                                                                                                                                                                                                                                                                                                                                                                                             |             |         |         |               |              |                         |                                        |                  |                        |                 |              |                                                                                                                |               |           |  |
| TM: Thomas McGovern, Anthropology Dept, Hunter College, 695 Park Ave, NYC 10021 USA                                                                                                                                                                                                                                                                                                                                                                                                                                                         |             |         |         |               |              |                         |                                        |                  |                        |                 |              |                                                                                                                |               |           |  |
| UA: Umberto Albarella, Department of Archaeology, University of Sheffield, Northgate House, West Street, Sheffield S1 4ET, UK                                                                                                                                                                                                                                                                                                                                                                                                               |             |         |         |               |              |                         |                                        |                  |                        |                 |              |                                                                                                                |               |           |  |
| VD: Valentin Dumitrescu, Institutul de Arheologie - Str Henri Coandă, nr. 11, Sector 1, cod 71113, Bucuresti                                                                                                                                                                                                                                                                                                                                                                                                                                |             |         |         |               |              |                         |                                        |                  |                        |                 |              |                                                                                                                |               |           |  |
| Site code / Context / Phase / Dating / Element information presented in these columns was provided by the people who provided the material. The dating information was based upon a variety of means including direct and associated <sup>14</sup> C analysis and stratigraphic or cultural association.                                                                                                                                                                                                                                    |             |         |         |               |              |                         |                                        |                  |                        |                 |              |                                                                                                                |               |           |  |
| Wild/Dom: Six different categories are used in this column. "Wild" and "Domestic" mean the samples were unambiguously defined as being one or the other based on methods discussed above. "Undetermined" signifies that no definitive determination could be made (usually as a result of the inappropriateness of the element) and use of question marks after words "wild" or "domestic" indicates there was some doubt in assigning a status. "Dom/feral" indicates that these samples are from an island where all pigs were introduced |             |         |         |               |              |                         |                                        |                  |                        |                 |              |                                                                                                                |               |           |  |



| Table 6. A list of dating and status determinations of all sequenced ancient specimens.                                                                   |        |        |         |         |          |           |       |        |                      |         |          |                      |               |           |  |
|-----------------------------------------------------------------------------------------------------------------------------------------------------------|--------|--------|---------|---------|----------|-----------|-------|--------|----------------------|---------|----------|----------------------|---------------|-----------|--|
| Extract                                                                                                                                                   | Source | Samp # | Spec. # | Country | Location | Site code | Phase | Dating | Dating Determination | Element | Wild/Dom | Criteria of Wild/Dom | Determination | Haplotype |  |
| and therefore most likely to be either fully domestic or living wild (feral), but derived from domestic stock.                                            |        |        |         |         |          |           |       |        |                      |         |          |                      |               |           |  |
| <b>Criteria of Wild/Dom:</b> Information in this column describes the criteria used to assign each sample to the categories listed above                  |        |        |         |         |          |           |       |        |                      |         |          |                      |               |           |  |
| <b>Determination:</b> This column lists the individuals responsible for assigning the status of the samples                                               |        |        |         |         |          |           |       |        |                      |         |          |                      |               |           |  |
| <b>Haplotype:</b> The information present in this column relates to one of the 18 different haplotypes evident after the truncation of the full data set. |        |        |         |         |          |           |       |        |                      |         |          |                      |               |           |  |
