# Supplementary material
Source: PubMed Central journal article supplement (PMC2000515)
Supplement: pnas_0703411104_9.pdf [file pnas_0703411104_9.pdf]

**Table 11.** List of haplotypes and the associated polymorphic sites determined by using the ANC1 primer set that generates a diagnostic 80-bp fragment

| ANC-Haplotype        | Group  | 2 | 3 | 5 | 24 | 25 | 31 | 36 | 40 | 44 | 47 | 49 | 52 | 53 | 60 | 61 | 62 | 64 | 65 | 72 | 77 | 78 |
|----------------------|--------|---|---|---|----|----|----|----|----|----|----|----|----|----|----|----|----|----|----|----|----|----|
| ANC-EAsia            | Grey   | T | G | G | C  | G  | -  | A  | A  | A  | A  | A  | -  | -  | A  | -  | -  | T  | T  | T  | G  | C  |
| ANC-GL132            |        | C | G | G | C  | G  | -  | A  | A  | A  | A  | A  | -  | C  | A  | -  | -  | T  | T  | T  | G  | T  |
| ANC-Y2-5A*           | Yellow | T | G | G | C  | G  | -  | A  | A  | A  | G  | A  | -  | C  | -  | -  | -  | C  | T  | T  | G  | C  |
| ANC-Y1-6A*           | Yellow | T | G | G | C  | G  | -  | A  | A  | A  | G  | A  | -  | C  | A  | -  | -  | C  | T  | T  | G  | C  |
| ANC-EJ               | Yellow | T | A | G | C  | G  | C  | A  | A  | A  | G  | A  | -  | C  | -  | -  | -  | C  | T  | T  | A  | C  |
| ANC-GL254            | Yellow | T | A | G | C  | G  | -  | A  | A  | A  | A  | A  | -  | C  | -  | -  | -  | C  | T  | T  | A  | C  |
| ANC-Arm1T*           | Yellow | T | G | G | C  | G  | -  | A  | A  | A  | G  | T  | A  | C  | A  | -  | -  | C  | T  | T  | A  | C  |
| ANC-Arm2T*           | Yellow | T | G | G | C  | G  | -  | A  | A  | A  | G  | T  | A  | C  | -  | -  | T  | C  | T  | T  | A  | C  |
| ANC-GL790            | Yellow | T | G | A | C  | G  | -  | A  | A  | A  | G  | T  | A  | C  | A  | -  | -  | C  | T  | T  | A  | C  |
| ANC-YueGermLandrace  |        | T | G | G | T  | G  | -  | A  | A  | A  | G  | A  | -  | -  | A  | -  | -  | T  | T  | C  | G  | C  |
| ANC-Italy*           | Orange | T | G | A | T  | G  | -  | A  | A  | G  | G  | A  | -  | C  | A  | -  | -  | C  | T  | T  | G  | C  |
| ANC-GL244            | Orange | T | G | A | T  | G  | -  | A  | A  | G  | G  | A  | -  | C  | A  | -  | -  | C  | G  | T  | G  | C  |
| ANC-Cside*           | Red    | T | G | G | T  | G  | -  | A  | A  | A  | G  | A  | -  | C  | A  | -  | -  | C  | T  | C  | A  | C  |
| ANC-LDomPietrain04   | Red    | T | G | G | T  | G  | -  | T  | T  | A  | G  | A  | -  | C  | A  | -  | -  | C  | T  | C  | A  | C  |
| ANC-GL242            | Red    | T | G | G | T  | G  | -  | A  | A  | A  | A  | A  | -  | C  | A  | -  | -  | C  | T  | C  | A  | C  |
| ANC-Finnish41        | Red    | T | G | G | T  | A  | -  | A  | A  | A  | G  | A  | -  | C  | A  | -  | -  | C  | T  | C  | A  | C  |
| ANC-LDomBritSaddle01 | Red    | T | G | G | T  | G  | -  | A  | T  | A  | G  | A  | -  | C  | A  | -  | -  | C  | T  | T  | A  | C  |
| ANC-Aside*           | Red    | T | G | G | T  | G  | -  | A  | T  | A  | G  | A  | -  | C  | A  | -  | -  | C  | T  | C  | A  | C  |

A Neighbor-Joining tree depicting the relationship between these haplotypes is shown in SI Fig 3. Asterisks denote the 7 of the 18 haplotypes identified in the ancient samples. This table also demonstrates the indels that differentiate the two pairs ANC-Y2-5A and ANC-Y1-6A, and ANC-Arm1T and ANC-Arm2T (highlighted in yellow). Arm1T and Arm2T have been abbreviated A1 and A2 in Fig 1 of the main text.
