# Supplementary material
Source: PubMed Central journal article supplement (PMC2000515)

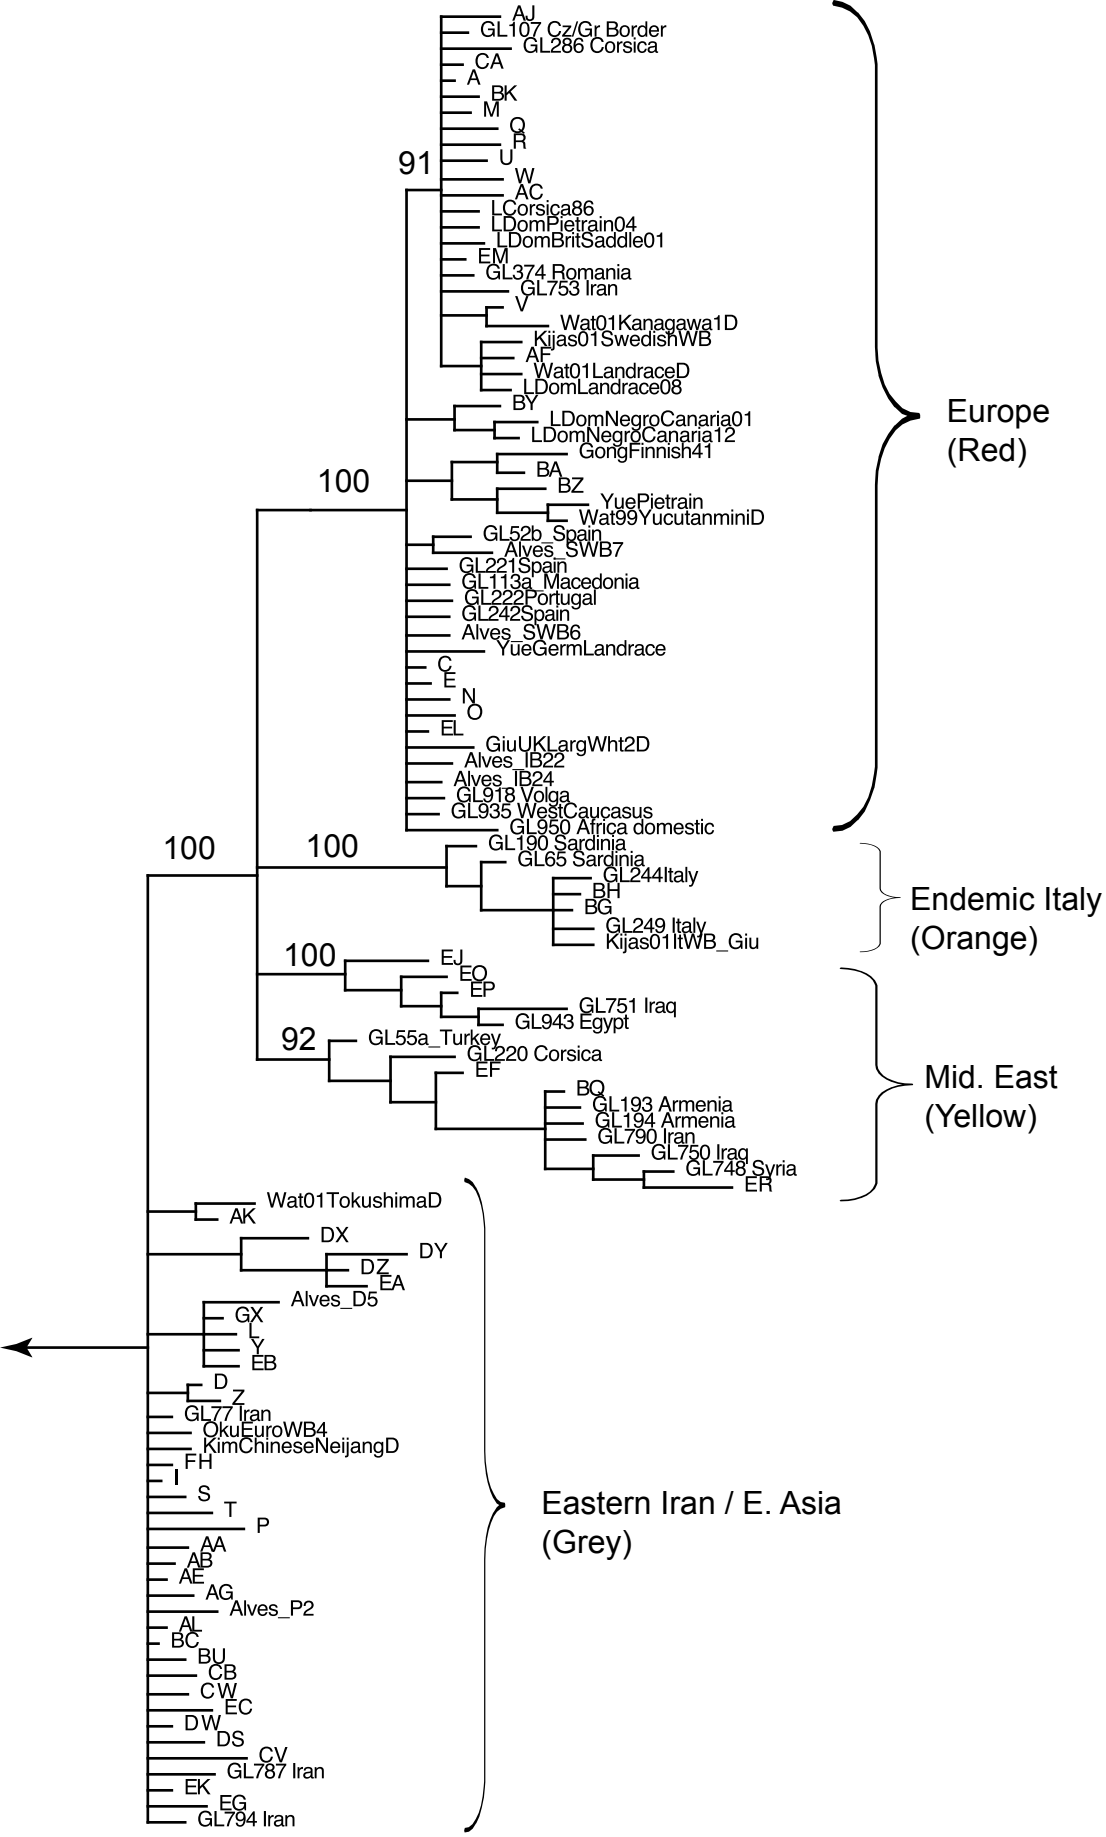

Supplement: pnas_0703411104_1.pdf [file pnas_0703411104_1.pdf]

Eastern Iran / E.Asia (Grey)

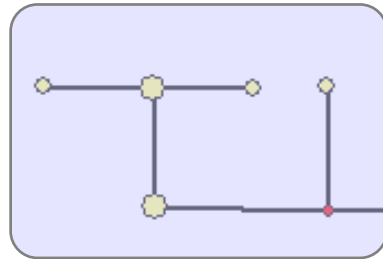

8

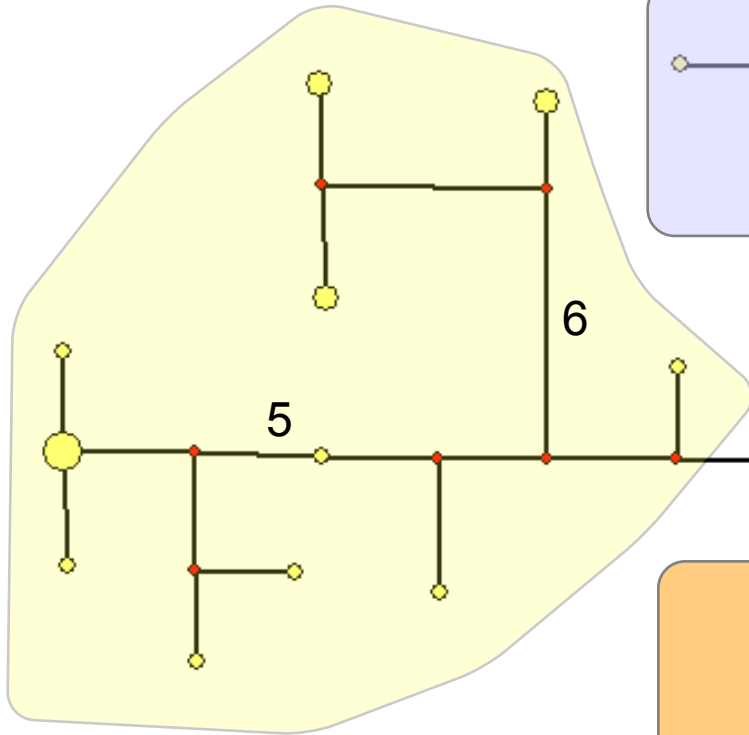

Mid. East (Yellow)

5

4

4

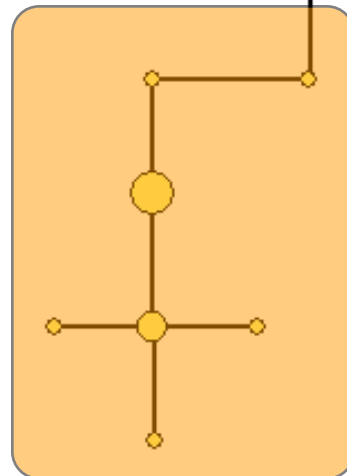

Endemic Italy (Orange)

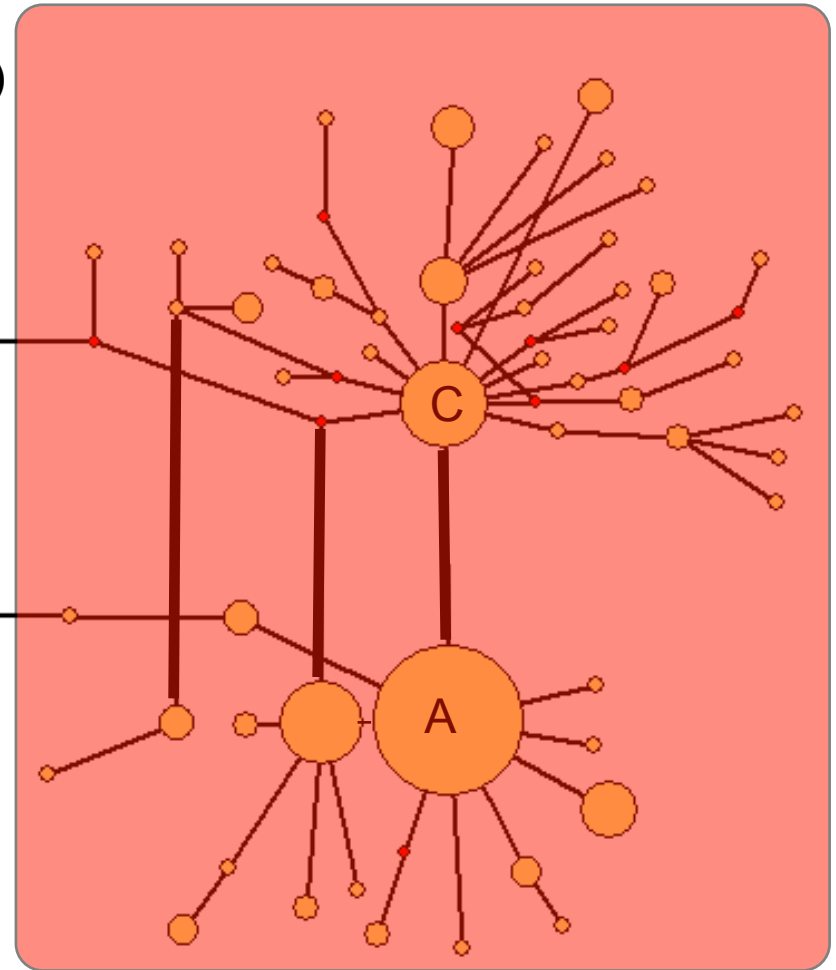

Europe (Red)

Supplement: pnas_0703411104_3.pdf [file pnas_0703411104_3.pdf]

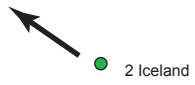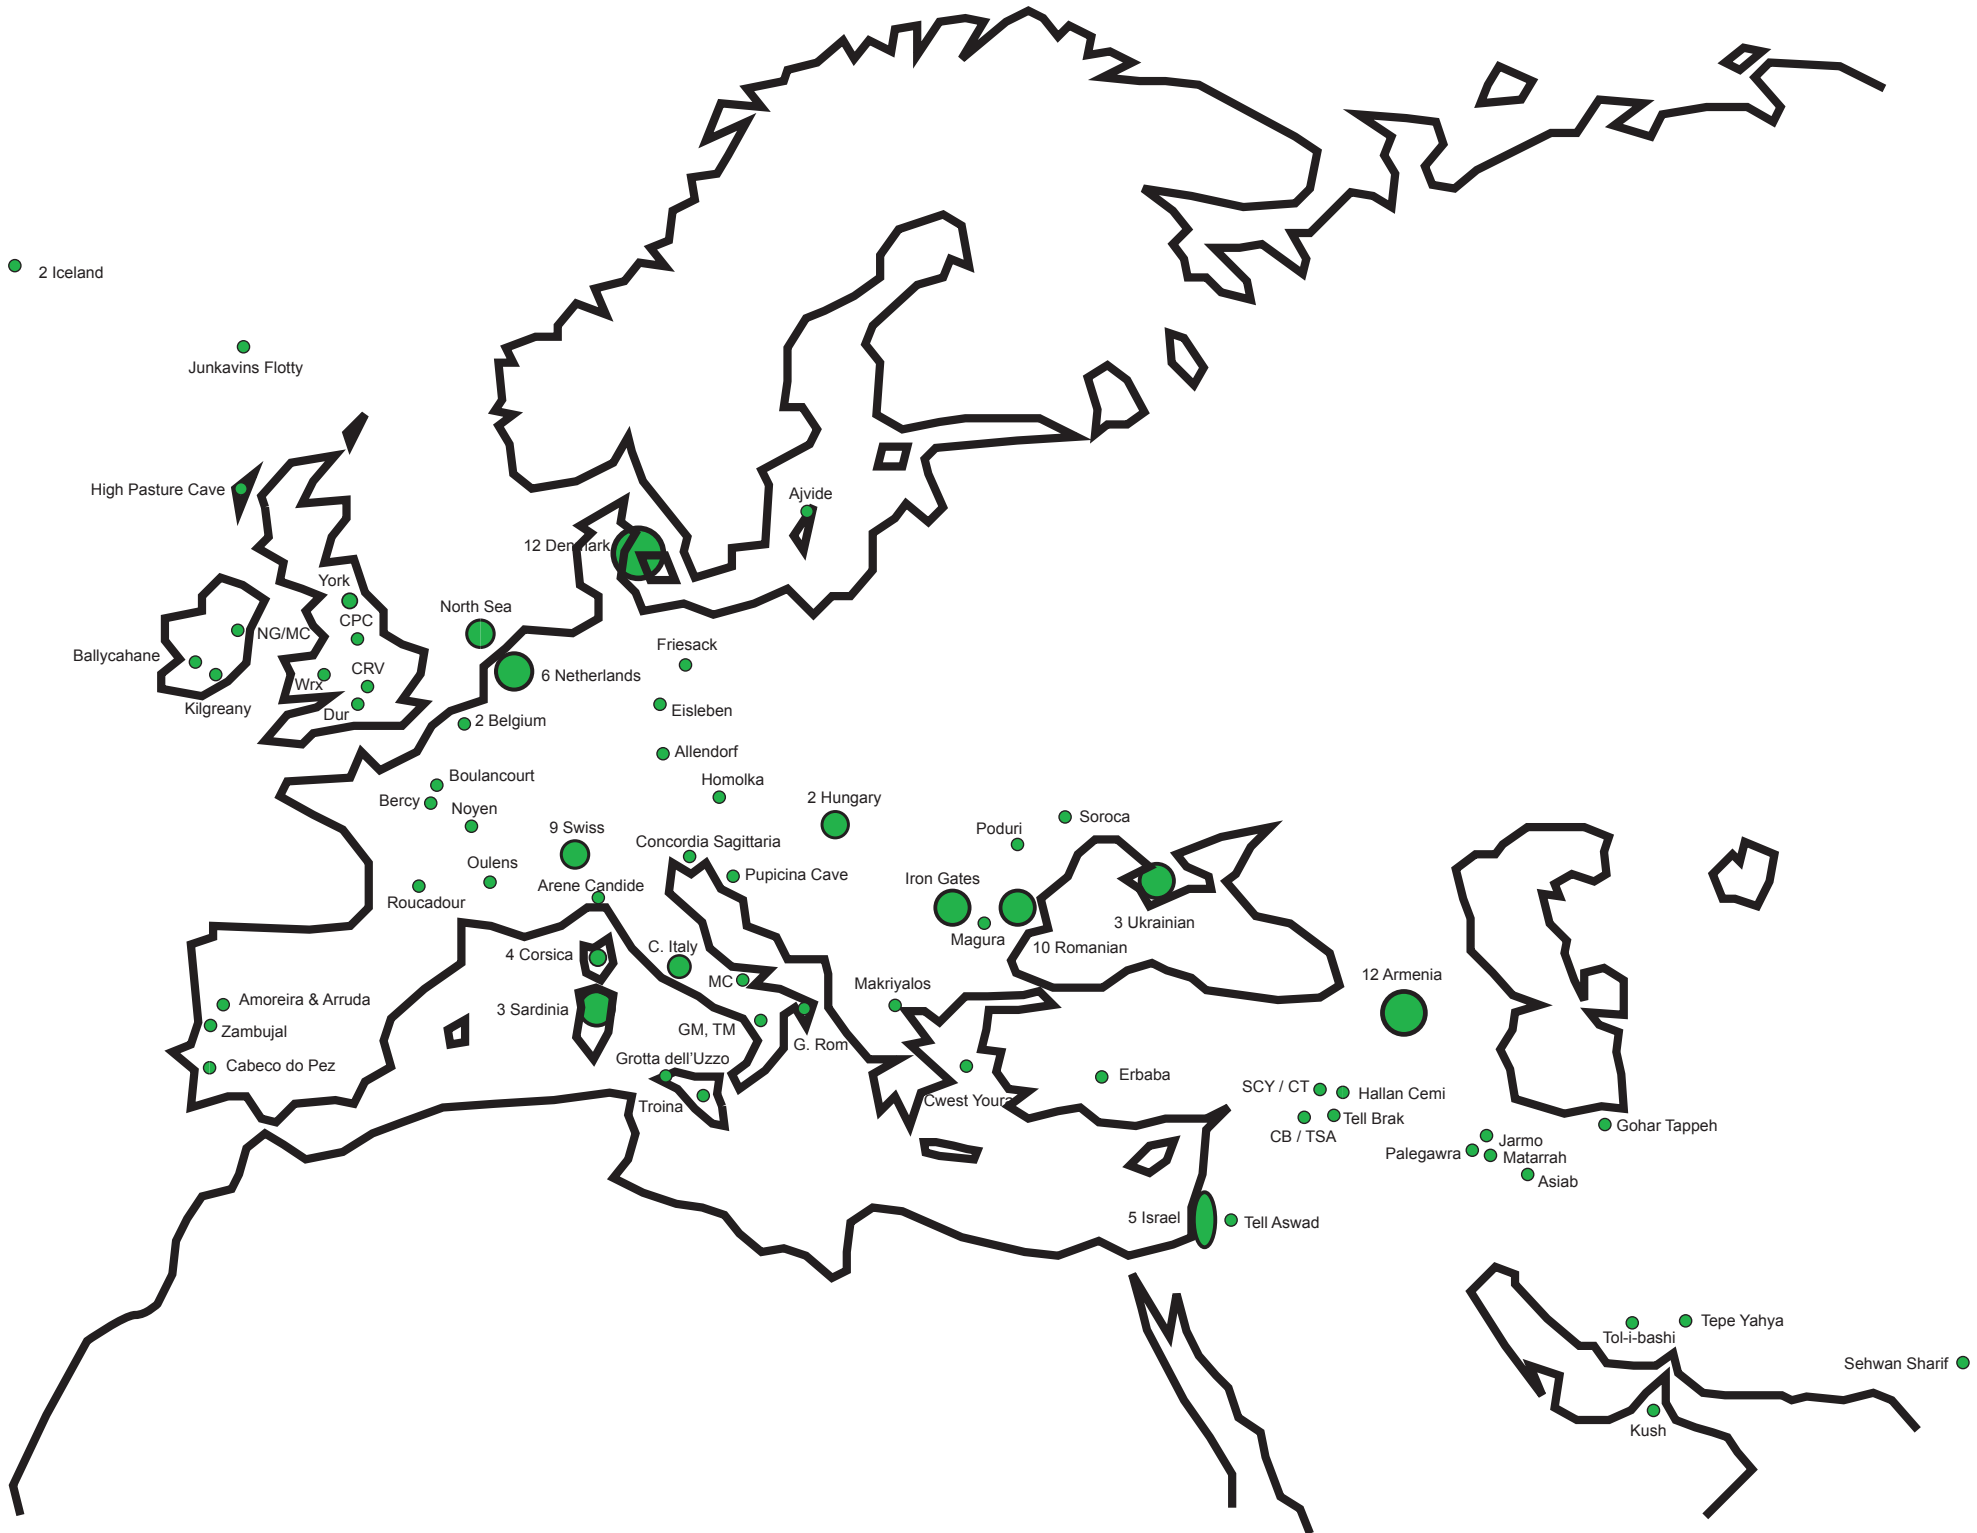

Supplement: pnas_0703411104_4.pdf [file pnas_0703411104_4.pdf]
